# Supplementary material for: The ortho effect in directed C–H activation
Source: Royal Society of Chemistry journal article supplement (doi:10.1039/d1sc00642h), 2021-01-01
Supplement: d1sc00642h2.xlsx [file d1sc00642h2.xlsx]

## Sheet: General Information
The Ortho Effect in Directed C-H Activation
Balázs L. Tóth,*1 Anna Monory,1 Orsolya Egyed,2 Attila Domján,2 Attila Bényei,3 Bálint Szathury,4 Zoltán Novák,*1 András Stirling*2,5
1 ELTE Catalysis and Organic Synthesis Research Group, Institute of Chemistry, Eötvös Loránd University, Faculty of Science, Pázmány Péter sétány. 1/A, H-1117 Budapest, Hungary.
2 Research Centre for Natural Sciences, Eötvös Loránd Research Network. Magyar Tudósok körútja 2. H-1117 Budapest, Hungary.
3 Department of Physical Chemistry, University of Debrecen, Egyetem tér 1, H-4032 Debrecen, Hungary.
4 Department of Chemistry, University of Cambridge, Lensfield Rd, Cambridge CB2 1EW, United Kingdom.
5 Department of Chemistry, Eszterházy Károly University, Leányka u. 6, H-3300 Eger, Hungary.
Full Interactive Database This provided Microsoft Excel (.xslx extension) file contains all the calculated elements of our database. • There is a conversion table (named as “Article-SI-Conversion”) which is dedicated to connect the serial numbers of substrates in the main article and SI file and between # numbers in this excel and the names of attached cartesian XYZ files. • The “OE Database” tab…

## Sheet: Article-SI-Conversion
Structure	SMILES	Name	Number in Article	Number in this Excel & attached XYZ files
	CC(NC1=CC=CC=C1)=O	N-phenylacetamide	-	23
	CC(N(C)C1=C(C)C=CC=C1)=O	N-methyl-N-(o-tolyl)acetamide	7	3
	CC(NC1=C(C)C=CC=C1)=O	N-(o-tolyl)acetamide	1	33
	CC(N(C)C1=CC=CC=C1)=O	N-methyl-N-phenylacetamide	5	4
	O=C1CCCN1C2=CC=CC=C2	1-phenylpyrrolidin-2-one	3	58
	O=C1N(C2=CC=CC=C2C)CCC1	1-(o-tolyl)pyrrolidin-2-one	6	314
	CC(N(CC1)C2=C1C=CC=C2)=O	1-(indolin-1-yl)ethan-1-one	2	93
	O=C(C)N1CCCC2=C1C=CC=C2	1-(3,4-dihydroquinolin-1(2H)-yl)ethan-1-one	4	2
	O=C(C1=CC=CC=C1)NC2=CC=CC=C2	N-phenylbenzamide	8	156
	O=C(NC1=CC=CC=C1C)C2=CC=CC=C2	N-(o-tolyl)benzamide benzamidos:	9	326
	O=C(NC1=CC=CC=C1)C2=CC=CC=C2C	2-methyl-N-phenylbenzamide	10	327
	O=C(NC1=CC=CC=C1C)C2=CC=CC=C2C	2-methyl-N-(o-tolyl)benzamide	11	328
	O=C(C1=CC=CC=C1)N(C)C2=CC=CC=C2	N-methyl-N-phenylbenzamide	12	323
	O=C(N(C)C1=CC=CC=C1C)C2=CC=CC=C2	N-methyl-N-(o-tolyl)benzamide	13	333
	O=C(N(C)C1=CC=CC=C1)C2=CC=CC=C2C	N,2-dimethyl-N-phenylbenzamide	14	334
	O=C(N(C)C1=CC=CC=C1C)C2=CC=CC=C2C	N,2-dimethyl-N-(o-tolyl)benzamide	15	335
	O=C(OC)NC1=CC=CC=C1	methyl phenylcarbamate	16	211
	O=C(OC(C)(C)C)NC1=CC=CC=C1	tert-butyl phenylcarbamate	17	138
	O=C(NC1=CC=CC=C1)N(C)C	1,1-dimethyl-3-phenylurea	18	208
	O=C(N(C)C)N(C)C1=CC=CC=C1	1,1,3-trimethyl-3-phenylurea	19	292
	O=C1CCC(N1C2=CC=CC=C2)=O	1-phenylpyrrolidine-2,5-dione	20	89
	O=C1CCC(N1C2=C(C)C=CC=C2)=O	1-(o-tolyl)pyrrolidine-2,5-dione	21	90
	C1(/N=N/C2=CC=CC=C2)=CC=CC=C1	(E)-1,2-diphenyldiazene	22	82
	O=C(C)C1=CC=CC=C1	acetophenone	23	119
	CC1=CC=CC=C1/C=N/C2=CC=CC=C2	(E)-N-phenyl-1-(o-tolyl)methanimine	24	222
	CC(CO1)(C)N=C1C2=CC=CC=C2C	4,4-dimethyl-2-(o-tolyl)-4,5-dihydrooxazole	25	250
	CC1=C(C2=NC=CC=N2)C=CC=C1	2-(o-tolyl)pyrimidine	26	80
	C12=CC=C(C=CC=N3)C3=C1C=CC=C2	benzo[h]quinoline	27	76
	CC1=CC(C2=CC=CC=N2)=CC=C1	2-(m-tolyl)pyridine	28	261
	CC1=C(C2=CC=CC=N2)C=CC=C1	2-(o-tolyl)pyridine	29	85
	CC1=CC=CN=C1C2=CC=CC=C2	3-methyl-2-phenylpyridine	30	226
	CC1=C(C2=C(C)C=CC=N2)C=CC=C1	3-methyl-2-(o-tolyl)pyridine	31	86
	O=C(NCCCC)C1=CC=CC=C1	N-butylbenzamide	32	298
	O=C(NCCCC)C1=CC=CC=C1C	N-butyl-2-methylbenzamide	33	301
	O=C(N(CCCC)C)C1=CC=CC=C1	N-butyl-N-methylbenzamide	34	299
	O=C(N(CCCC)C)C1=CC=CC=C1C	N-butyl-N,2-dimethylbenzamide	35	300
	O=C(N(CC)CC)C1=CC=CC(C)=C1	N,N-diethyl-3-methylbenzamide	36	296
	O=C(N(CC)CC)C1=CC=CC=C1C	N,N-diethyl-2-methylbenzamide	37	297
	O=C(N(C)OC)C1=CC=CC=C1	N-methoxy-N-methylbenzamide	38	287
	O=C(N(C)OC)C1=CC=CC=C1C	N-methoxy-N,2-dimethylbenzamide	39	288
	O=C(NC1=CC=CC(OC)=C1)C2=CC=CC=C2	N-(3-methoxyphenyl)benzamide	40	330
	O=C(NC1=CC=CC=C1)C2=CC=CC(OC)=C2	3-methoxy-N-phenylbenzamide	41	329
	O=C(NC1=CC=CC=C1C)C2=CC=C(OC)C=C2	4-methoxy-N-(o-tolyl)benzamide	42	331
	O=C(NC1=CC=CC=C1C)C2=CC=C([N+]([O-])=O)C=C2	4-nitro-N-(o-tolyl)benzamide	43	332
	O=C(N(C1=CC=CC(OC)=C1)C)C2=CC=CC=C2	N-(3-methoxyphenyl)-N-methylbenzamide	44	336
	O=C(N(C)C1=CC=CC=C1)C2=CC=CC(OC)=C2	3-methoxy-N-methyl-N-phenylbenzamide	45	280

## Sheet: OE Database
SI #	Structure	SMILES	Name	Dihedral Angle (1,2,3,4)	Optimized E	0° Coplanar E	ΔGrot	ΔGrot/RT	Complex Yield (%)	Reaction Temperature / °C	Necessary Temperature / °C	Reaction Time / h	Directing Group	Link to the Published Reaction Conditions		TEMPERATURE CONTROL PANEL
2		O=C(C)N1CCCC2=C1C=CC=C2	1-(3,4-dihydroquinolin-1(2H)-yl)ethan-1-one	44.3	-556.959	-556.956	1.81353	3.06089	75	40	25	1	AmideNR			TEMPERATURE CONTROL PANEL
3		CC(N(C)C1=C(C)C=CC=C1)=O	N-methyl-N-(o-tolyl)acetamide	109.1	-518.849	-518.83	12.2859	20.7363	0	40	25	1	AmideNR			Set temperature
4		CC(N(C)C1=CC=CC=C1)=O	N-methyl-N-phenylacetamide	52.1	-479.532	-479.528	2.43967	4.11769	0	40	25	1	AmideNR			In cell R4 the Necessary Temperature (for column L) can be set to the chosen temperature value (in °C unit) in order to calculate ΔGrot/RT values (column I).
5		O=C1C2=C(C=CC=C2)C(N1C3=C(C)C=CC=C3)=O	2-(o-tolyl)isoindoline-1,3-dione	70.3	-783.394	-783.363	19.3964	32.7373	0	40	25	1	Imide			°C	25	in °F	77	in K	298.15
6		O=C1CCC(N1C2=C(CC(F)(F)F)C=CC=C2)=O	1-(2-(2,2,2-trifluoroethyl)phenyl)pyrrolidine-2,5-dione	55.5	-968.058	-968.035	14.1359	23.8586	0	40	25	1	Imide			Apply custom temperature for all entries?
7		O=C1C=CC(N1C2=CC=CC=C2)=O	1-phenyl-1H-pyrrole-2,5-dione	50.1	-744.076	-744.071	3.07032	5.18211	#N/A	25	25	#N/A	Imide			for using literature temperature data type 0 to cell T8: Apply the Necessary Temperture (defined in cell R4, in °C) ONLY for those rows, where there are NO available value for Published Reaction Temperature (column K, with red numbers). for using custom temperature data type 1 to cell T8: Apply the Necessary Temperture (defined in cell R4, in °C) for each row, override the Published Reaction Temp…
8		CC(NC1=C(CC(F)(F)F)C=CC=C1)=O	N-(2-(2,2,2-trifluoroethyl)phenyl)acetamide	32.4	-816.606	-816.606	0.242417	0.409153	#N/A	25	25	#N/A	AmideNH			1 = YES 0 = NO			1
9		C1(C2=CC=CC=C2)=NC=CC=C1	2-phenylpyridine	27.4	-479.288	-479.287	0.440319	0.743173	99	25	25	3	Py	dx.doi.org/10.1021/ja1036644
14		C/C(C1=CC=CC=C1)=N\C2=CC=CC=C2	(E)-N,1-diphenylethan-1-imine	0	-596.001	-596.001	0	0	99	118	25	0.5	Imine	dx.doi.org/10.1016/S0022-328X(00)81621-6
16		C1(/C=N/C2=CC=CC=C2)=CC=CC=C1	(E)-N,1-diphenylmethanimine	1.2	-556.685	-556.685	0.00354349	0.00598073	96	118	25	0.5	Imine	dx.doi.org/10.1016/S0022-328X(00)81621-6
20		C(/C1=CC=CC=C1)(C2=CC=CC=C2)=N\C3=CC=CC=C3	N,1,1-triphenylmethanimine	21.8	-787.714	-787.713	0.622496	1.05065	87	118	25	0.5	Imine	dx.doi.org/10.1016/S0022-328X(00)81621-6
22		CC(NC1=C(OC)C=C(OC)C=C1)=O	N-(2,4-dimethoxyphenyl)acetamide	0.332	-669.278	-669.278	-2.50997e-06	-4.23635e-06	68	25	25	1-10	AmideNH	dx.doi.org/10.1039/c3cc43479f
23		CC(NC1=CC=CC=C1)=O	N-phenylacetamide	0	-440.234	-440.234	0	0	99	110	25	0.5	AmideNH	dx.doi.org/10.1021/jo00335a019
33		CC(NC1=C(C)C=CC=C1)=O	N-(o-tolyl)acetamide	0	-479.55	-479.55	0	0	93	40	25	3	AmideNH	dx.doi.org/10.1002/anie.201510555
35		CC(NC1=CC=CC(C)=C1)=O	N-(m-tolyl)acetamide	0.1	-479.55	-479.55	0	0	94	70	25	2.5	AmideNH	doi.org/10.1002/hlca.19920750807
38		CC(NC1=CC=C(C)C=C1)=O	N-(p-tolyl)acetamide	0	-479.55	-479.55	0	0	96	25	25	2	AmideNH	dx.doi.org/10.1039/C0DT00378F
47		CC(NC1=CC=CC=C1[N+]([O-])=O)=O	N-(2-nitrophenyl)acetamide	0	-644.731	-644.731	0	0	#N/A	25	25	#N/A	AmideNH
48		CC(NC1=CC=CC([N+]([O-])=O)=C1)=O	N-(3-nitrophenyl)acetamide	0	-644.731	-644.731	0	0	#N/A	25	25	#N/A	AmideNH
49		CC(NC1=CC=C([N+]([O-])=O)C=C1)=O	N-(4-nitrophenyl)acetamide	0	-644.732	-644.732	0	0	#N/A	25	25	#N/A	AmideNH
50		CC(NC1=CC=CC=C1OC)=O	N-(2-methoxyphenyl)acetamide	0	-554.758	-554.758	0	0	#N/A	25	25	#N/A	AmideNH
51		CC(NC1=CC=CC(OC)=C1)=O	N-(3-methoxyphenyl)acetamide	0	-554.754	-554.754	0	0	66	40	25	1	AmideNH
52		CC(NC1=CC=C(OC)C=C1)=O	N-(4-methoxyphenyl)acetamide	0	-554.754	-554.754	0	0	92	25	25	1-10	AmideNH	dx.doi.org/10.1039/c3cc43479f
55		O=C(C(C)(C)C)NC1=CC=CC=C1	N-phenylpivalamide	0	-558.174	-558.174	0	0	76	25	25	1-10	AmideNH	dx.doi.org/10.1039/C4CC02969K
57		CC(NC1=CC=CC=C1C(C)(C)C)=O	N-(2-(tert-butyl)phenyl)acetamide	44.9	-597.481	-597.481	0.318309	0.537245	#N/A	25	25	#N/A	AmideNH
58		O=C1CCCN1C2=CC=CC=C2	1-phenylpyrrolidin-2-one	23.6	-517.647	-517.646	0.567155	0.957247	87	40	25	3	AmideNR	dx.doi.org/10.1039/C0SC00231C
59		O=C1CCC(C)N1C2=CC=CC=C2	5-methyl-1-phenylpyrrolidin-2-one	3.4	-556.963	-556.963	0.0316266	0.0533796	#N/A	25	25	#N/A	AmideNR
60		O=C1CCC(C)(C)N1C2=CC=CC=C2	5,5-dimethyl-1-phenylpyrrolidin-2-one	65.7	-596.279	-596.271	5.14291	8.68024	#N/A	25	25	#N/A	AmideNR
61		O=C(N(C)C)NC1=CC=CC=C1C(C)C	3-(2-isopropylphenyl)-1,1-dimethylurea	25.2	-652.835	-652.835	0.029249	0.0493667	#N/A	25	25	#N/A	UreaNH
62		O=C(NC)NC1=CC=CC=C1	1-methyl-3-phenylurea	7.7	-495.593	-495.593	0.0414351	0.0699344	#N/A	25	25	#N/A	UreaNH
63		O=C(N)C1=CC=CC=C1	benzamide	24.1	-400.927	-400.926	0.510301	0.86129	#N/A	25	25	#N/A	BenzamideNH
64		O=C(N)C1=CC=CC=C1C	2-methylbenzamide	43.3	-440.239	-440.236	1.67421	2.82574	#N/A	25	25	#N/A	BenzamideNH
65		O=C(NOC)C1=CC=CC=C1	N-methoxybenzamide	31.1	-515.379	-515.377	0.765138	1.2914	96	100	25	2-4	BenzamideNH	dx.doi.org/10.1039/C7CC01201B
66		O=C(NOC(C)(C)C)C1=CC=CC=C1	N-(tert-butoxy)benzamide	38.2	-633.334	-633.331	2.00355	3.38161	#N/A	25	25	#N/A	BenzamideNH
67		O=C(NOC(C)(C)C)C1=CC=CC=C1C	N-(tert-butoxy)-2-methylbenzamide	67.2	-672.65	-672.636	8.73238	14.7386	#N/A	25	25	#N/A	BenzamideNH
68		C1(N2N=CC=C2)=CC=CC=C1	1-phenyl-1H-pyrazole	26.8	-457.207	-457.206	0.339764	0.573455	#N/A	25	25	#N/A	Het
69		CC1=CC=CC=C1N2N=CC=C2	1-(o-tolyl)-1H-pyrazole	51.5	-496.521	-496.515	3.56517	6.01732	#N/A	25	25	#N/A	Het
70		C1(C2=CC=NN2)=CC=CC=C1	5-phenyl-1H-pyrazole	14.2	-457.216	-457.216	0.0318048	0.0536804	#N/A	25	25	#N/A	Het
71		CC1=C(C2=CC=NN2)C=CC=C1	5-(o-tolyl)-1H-pyrazole	38.6	-496.53	-496.528	1.22429	2.06637	#N/A	25	25	#N/A	Het
72		CC(C)(C)/N=C/C1=CC=CC=C1	(E)-N-tert-butyl-1-phenylmethanimine	0.1	-482.911	-482.911	0	0	95	80	25	1-2	Imine	dx.doi.org/10.1039/P19880001317
74		C1(C2=NCCO2)=CC=CC=C1	2-phenyl-4,5-dihydrooxazole	0.1	-478.302	-478.302	0	0	63	50	25	1	Imine	dx.doi.org/10.1016/S0022-328X(00)00133-9
76		C12=CC=C(C=CC=N3)C3=C1C=CC=C2	benzo[h]quinoline	0	-555.509	-555.509	0	0	88	23	25	8	Py	dx.doi.org/10.1021/ja1036644
79		C1(C2=NC=CC=N2)=CC=CC=C1	2-phenylpyrimidine	0	-495.33	-495.33	0	0	90	60	25	15	Py	dx.doi.org/10.1016/j.tetlet.2010.10.061
80		CC1=C(C2=NC=CC=N2)C=CC=C1	2-(o-tolyl)pyrimidine	32.5	-534.641	-534.64	0.68618	1.15814	#N/A	25	25	#N/A	Py
81		CC(C)(C)C1=C(C2=NC=CC=N2)C=CC=C1	2-(2-(tert-butyl)phenyl)pyrimidine	65.8	-652.571	-652.562	5.8774	9.91992	#N/A	25	25	#N/A	Py
82		C1(/N=N/C2=CC=CC=C2)=CC=CC=C1	(E)-1,2-diphenyldiazene	0	-572.693	-572.693	0	0	91	50	25	6	Azo	dx.doi.org/10.1016/S0020-1693(00)00216-4
85		CC1=C(C2=CC=CC=N2)C=CC=C1	2-(o-tolyl)pyridine	46.8	-518.601	-518.595	3.7013	6.24707	66	118	25	12	Py	dx.doi.org/10.1016/S0022-328X(03)00457-1
86		CC1=C(C2=C(C)C=CC=N2)C=CC=C1	3-methyl-2-(o-tolyl)pyridine	93.5	-557.918	-557.893	15.5041	26.1679	#N/A	25	25	#N/A	Py
87		O=C1CCCCN1C2=CC=CC=C2	1-phenylpiperidin-2-one	56.3	-556.956	-556.95	3.29493	5.5612	#N/A	25	25	#N/A	AmideNR
88		O=C1CCCCCN1C2=CC=CC=C2	1-phenylazepan-2-one	60.9	-596.266	-596.26	4.04885	6.83367	#N/A	25	25	#N/A	AmideNR
89		O=C1CCC(N1C2=CC=CC=C2)=O	1-phenylpyrrolidine-2,5-dione	52.6	-591.678	-591.672	3.51549	5.93346	#N/A	25	25	#N/A	Imide
90		O=C1CCC(N1C2=C(C)C=CC=C2)=O	1-(o-tolyl)pyrrolidine-2,5-dione	72.6	-630.996	-630.97	16.3137	27.5344	#N/A	25	25	#N/A	Imide
91		O=C1CCCC(N1C2=CC=CC=C2)=O	1-phenylpiperidine-2,6-dione	89.3	-630.986	-630.97	9.91634	16.7369	#N/A	25	25	#N/A	Imide
92		O=C1CCCC(N1C2=C(C)C=CC=C2)=O	1-(o-tolyl)piperidine-2,6-dione	92	-670.304	-670.281	14.6977	24.8069	#N/A	25	25	#N/A	Imide
93		CC(N(CC1)C2=C1C=CC=C2)=O	1-(indolin-1-yl)ethan-1-one	2.4	-517.647	-517.647	0.0816698	0.137843	76	40	25	0.75	AmideNR
94		O=C1CCC(C)(C)N1C2=C(C)C=CC=C2	5,5-dimethyl-1-(o-tolyl)pyrrolidin-2-one	114.4	-635.597	-635.561	22.2576	37.5665	#N/A	25	25	#N/A	AmideNR
95		CC1=C(C2=NCCO2)C=CC=C1	2-(o-tolyl)-4,5-dihydrooxazole	2.8	-517.616	-517.616	0.0038221	0.00645097	#N/A	25	25	#N/A	Imine
96		O=C(NC(C)(C)C)C1=CC=CC=C1	N-(tert-butyl)benzamide	27.9	-558.177	-558.176	0.598517	1.01018	#N/A	25	25	#N/A	BenzamideNH
97		O=C(NC1=C(F)C=CC=C1F)C2=CC=CC=C2	N-(2,6-difluorophenyl)benzamide	26	-830.421	-830.42	0.838089	1.41453	#N/A	25	25	#N/A	BenzamideNH
98		O=C(NS(=O)(C1=CC=C(C)C=C1)=O)C2=CC=CC=C2	N-tosylbenzamide	26.1	-1219.83	-1219.83	0.62526	1.05532	#N/A	25	25	#N/A	BenzamideNH
100		CC(C)(C)/N=C/C1=C(C)C=CC=C1	(E)-N-tert-butyl-1-(o-tolyl)methanimine	0.4	-522.227	-522.227	0	0	#N/A	25	25	#N/A	Imine
101		N=C(C1=CC=CC=C1)C2=CC=CC=C2	diphenylmethanimine	23.7	-556.691	-556.69	0.709665	1.19778	79	60	25	24	Imine	dx.doi.org/10.1016/j.jorganchem.2012.11.034
102		N=C(C1=CC=CC=C1)C2=C(C)C=CC=C2	phenyl(o-tolyl)methanimine	16.9	-596.008	-596.008	0.271952	0.459002	#N/A	25	25	#N/A	Imine
103		N=C(C1=CC=CC=C1)C2=C(C)C=CC=C2C	(2,6-dimethylphenyl)(phenyl)methanimine	0.1	-635.325	-635.325	0.119872	0.202321	#N/A	25	25	#N/A	Imine
104		N=C(C1=C(C)C=CC=C1)C2=C(C)C=CC=C2C	(2,6-dimethylphenyl)(o-tolyl)methanimine	33.8	-674.636	-674.634	1.22448	2.06668	#N/A	25	25	#N/A	Imine
105		NC(NC1=CC=CC=C1)=N	1-phenylguanidine	4.6	-436.39	-436.39	0.142103	0.239842	#N/A	25	25	#N/A	GuanidineNH
106		NC(N(C)C1=CC=CC=C1)=N	1-methyl-1-phenylguanidine	51.1	-475.687	-475.682	3.00789	5.07673	#N/A	25	25	#N/A	GuanidineNR
107		NC(NC1=CC=CC=C1C)=N	1-(o-tolyl)guanidine	2.52	-475.706	-475.706	0.1152	0.194435	#N/A	25	25	#N/A	GuanidineNH
109		N=C(NC(C)(C)C)C1=CC=CC=C1	N-(tert-butyl)benzimidamide	33.6	-538.279	-538.277	1.40246	2.36708	#N/A	25	25	#N/A	Imine
110		N=C(NC(C)(C)C)C1=CC=CC=C1C	N-(tert-butyl)-2-methylbenzimidamide	68.2	-577.593	-577.585	5.30994	8.96215	#N/A	25	25	#N/A	Imine
111		O=C(O)C1=CC=CC=C1	benzoic acid	0	-420.799	-420.799	0	0	#N/A	25	25	#N/A	Ketone
112		O=C([O-])C1=CC=CC=C1	benzoate	0	-420.244	-420.244	1.757e-05	2.96547e-05	#N/A	25	25	#N/A	Ketone
113		O=C(O)C1=C(C)C=CC=C1	2-methylbenzoic acid	0	-460.112	-460.112	8.78501e-06	1.48274e-05	#N/A	25	25	#N/A	Ketone
114		O=C([O-])C1=C(C)C=CC=C1	2-methylbenzoate	27.8	-459.556	-459.556	0.122858	0.20736	90	100	25	2	Ketone	dx.doi.org/10.1021/ja8063827
115		O=C(OC)C1=CC=CC=C1	methyl benzoate	0	-460.095	-460.095	3.70225e-05	6.24868e-05	#N/A	25	25	#N/A	Ketone
116		O=C(OC)C1=C(C)C=CC=C1	methyl 2-methylbenzoate	10.8	-499.406	-499.406	0.00156059	0.00263398	#N/A	25	25	#N/A	Ketone
117		O=C(OC(C)(C)C)C1=CC=CC=C1	tert-butyl benzoate	0	-578.043	-578.043	0	0	#N/A	25	25	#N/A	Ketone
118		O=C(OC(C)(C)C)C1=C(C)C=CC=C1	tert-butyl 2-methylbenzoate	18.8	-617.355	-617.355	0.0538627	0.0909098	#N/A	25	25	#N/A	Ketone
119		O=C(C)C1=CC=CC=C1	acetophenone	0	-384.862	-384.862	-1.757e-05	-2.96548e-05	75	120	25	3	Ketone	dx.doi.org/10.1021/ja1026248
120		O=C(C)C1=CC=CC=C1C	1-(o-tolyl)ethan-1-one	35.1	-424.172	-424.171	0.922813	1.55753	#N/A	25	25	#N/A	Ketone
121		O=C(N)NC1=CC=CC=C1	1-phenylurea	7.8	-456.29	-456.29	0.0423795	0.0715283	#N/A	25	25	#N/A	UreaNH
122		O=C(N)N(C)C1=CC=CC=C1	1-methyl-1-phenylurea	55.8	-495.589	-495.585	2.48926	4.20139	#N/A	25	25	#N/A	UreaNR
123		O=C(N)N(C)C1=CC=CC=C1C	1-methyl-1-(o-tolyl)urea	111	-534.907	-534.89	10.5978	17.8871	#N/A	25	25	#N/A	UreaNR
124		O=C(N(C1CCCCC1)C2CCCCC2)NC3=CC=CC=C3	1,1-dicyclohexyl-3-phenylurea	17.6	-925.623	-925.623	0.324033	0.546905	#N/A	25	25	#N/A	UreaNH
125		O=C(C)N1CC=CC2=C1C=CC=C2	1-(quinolin-1(2H)-yl)ethan-1-one	43.2	-555.726	-555.721	3.06708	5.17664	#N/A	25	25	#N/A	AmideNR
126		O=C(C)N1C=CCC2=C1C=CC=C2	1-(quinolin-1(4H)-yl)ethan-1-one	36.6	-555.727	-555.723	2.23086	3.76527	#N/A	25	25	#N/A	AmideNR
127		O=C(C)N1C(C)CCC2=C1C=CC=C2	1-(2-methyl-3,4-dihydroquinolin-1(2H)-yl)ethan-1-one	48.9	-596.274	-596.264	6.27859	10.597	#N/A	25	25	#N/A	AmideNR
128		O=C(C)N1C(C)(C)CCC2=C1C=CC=C2	1-(2,2-dimethyl-3,4-dihydroquinolin-1(2H)-yl)ethan-1-one	142	-635.583	-635.567	9.5392	16.1003	#N/A	25	25	#N/A	AmideNR
138		O=C(OC(C)(C)C)NC1=CC=CC=C1	tert-butyl phenylcarbamate	0	-633.409	-633.409	0	0	#N/A	25	25	#N/A	CarbamideNH
139		O=C(OC(C)(C)C)NC1=CC=CC=C1C	tert-butyl o-tolylcarbamate	0	-672.725	-672.725	0	0	#N/A	25	25	#N/A	CarbamideNH
140		O=C(OC(C)(C)C)N(C)C1=CC=CC=C1	tert-butyl methyl(phenyl)carbamate	50.1	-672.707	-672.704	2.009	3.39081	#N/A	25	25	#N/A	CarbamideNR
141		O=C(OC(C)(C)C)N(C)C1=C(C)C=CC=C1	tert-butyl methyl(o-tolyl)carbamate	110	-712.025	-712.006	11.9176	20.1146	#N/A	25	25	#N/A	CarbamideNR
144		CC(N(C)C1=CC=CC=C1)=S	N-methyl-N-phenylethanethioamide	89.5	-802.488	-802.473	9.21086	15.5462	#N/A	25	25	#N/A	TioamideNR
145		CC(N(C)C1=C(C)C=CC=C1)=S	N-methyl-N-(o-tolyl)ethanethioamide	91.3	-841.807	-841.776	19.565	33.0219	#N/A	25	25	#N/A	TioamideNR
146		O=C1OCCN1C2=CC=CC=C2	3-phenyloxazolidin-2-one	21.6	-553.555	-553.554	0.370733	0.625725	#N/A	25	25	#N/A	CarbamideNR
147		O=C(C)NC1=CC=C(OC)C(OC)=C1	N-(3,4-dimethoxyphenyl)acetamide	0	-669.266	-669.266	0	0	93	25	25	1-10	AmideNH	dx.doi.org/10.1039/c3cc43479f
148		O=C(C)NC1=C(OC)C=C(OC)C=C1	N-(2,4-dimethoxyphenyl)acetamide	0	-669.276	-669.276	0	0	68	25	25	1-10	AmideNH	dx.doi.org/10.1039/c3cc43479f
149		O=C(NC1=CC=CC=C1C2=CC=CC=C2)C	N-([1,1'-biphenyl]-2-yl)acetamide	7.7	-671.265	-671.265	0.0477634	0.0806154	80	25	25	2	AmideNH	dx.doi.org/10.1002/asia.201000613
150		O=C(NC1=CC=CC=C1C2=CC(C)=CC=C2)C	N-(3'-methyl-[1,1'-biphenyl]-2-yl)acetamide	7.8	-710.582	-710.582	0.0481506	0.0812689	75	110	25	4	AmideNH	dx.doi.org/10.1039/C7CC00110J
151		CC1=CC(C)=C(NC(C(C)(C)C)=O)C=C1	N-(2,4-dimethylphenyl)pivalamide	0.2	-636.806	-636.806	1.757e-05	2.96547e-05	80	40	25	0.5	AmideNH	dx.doi.org/10.1021/ja106364r
152		O=C(C(C)(C)C)NC1=CC(C)=CC=C1	N-(m-tolyl)pivalamide	0.1	-597.49	-597.49	-5.64744e-06	-9.53179e-06	89	40	25	3	AmideNH	dx.doi.org/10.1039/C0SC00231C
153		CC1=CC=C(NC(C(C)(C)C)=O)C=C1	N-(p-tolyl)pivalamide	0.5	-597.489	-597.489	0.000171307	0.000289134	89	80	25	2	AmideNH	dx.doi.org/10.1039/C0DT00385A
156		O=C(C1=CC=CC=C1)NC2=CC=CC=C2	N-phenylbenzamide	29.1	-631.946	-631.944	0.744674	1.25687	0	40	25	0.5	BenzamideNH	dx.doi.org/10.1021/jo00335a019
			aniline	6.6	-631.946	-631.946	0.0222047	0.0374773	84	40	25	1	AmideNH
158		C=CC(NC1=CC=CC=C1)=O	N-phenylacrylamide	0	-478.307	-478.307	0	0	0	110	25	0.5	AmideNH	dx.doi.org/10.1021/jo00335a019
159		O=C(NOC)C1=CC(C)=CC=C1	N-methoxy-3-methylbenzamide	28.5	-554.697	-554.696	0.915051	1.54443	86	120	25	0.1666	BenzamideNH	dx.doi.org/10.1002/anie.201005874
160		O=C(NOC)C1=CC=C(Br)C=C1	4-bromo-N-methoxybenzamide	27.5	-3088.95	-3088.95	0.871196	1.47041	83	120	25	0.5	BenzamideNH	dx.doi.org/10.1002/anie.201005874
161		C/N=C/C1=CC=CC=C1	(E)-N-methyl-1-phenylmethanimine	0	-364.968	-364.968	0	0	99	118	25	0.5	Imine	dx.doi.org/10.1016/S0022-328X(00)81621-6
163		CCCC/N=C/C1=CC=CC=C1	(E)-N-butyl-1-phenylmethanimine	0.2	-482.908	-482.908	0	0	91	80	25	1-2	Imine	dx.doi.org/10.1039/P19880001317
164		CC(C)/N=C/C1=CC=CC=C1	(E)-N-isopropyl-1-phenylmethanimine	0.4	-443.596	-443.596	0	0	94	80	25	1-2	Imine	dx.doi.org/10.1039/P19880001317
165		C/C(C1=CC=CC=C1)=N\CCCC	(E)-N-butyl-1-phenylethan-1-imine	5.3	-522.221	-522.221	-0.00176704	-0.00298242	63	80	25	1-2	Imine	dx.doi.org/10.1039/P19880001317
166		CC(C)(C)/N=C/C1=CC(OC)=C(OC)C=C1	(E)-N-tert-butyl-1-(3,4-dimethoxyphenyl)methanimine	0.5	-711.947	-711.947	0	0	89	80	25	1-2	Imine	dx.doi.org/10.1039/P19880001317
167		CC(C)(C)/N=C/C1=C(OC)C=CC=C1	(E)-N-tert-butyl-1-(2-methoxyphenyl)methanimine	0	-597.431	-597.431	0	0	81	80	25	1-2	Imine	dx.doi.org/10.1039/P19880001317
168		CC(C)(C)/N=C/C1=CC(OC)=CC=C1	(E)-N-tert-butyl-1-(3-methoxyphenyl)methanimine	0	-597.431	-597.431	0	0	96	80	25	1-2	Imine	dx.doi.org/10.1039/P19880001317
169		CC(C)(C)/N=C/C1=CC=C(OC)C=C1	(E)-N-tert-butyl-1-(4-methoxyphenyl)methanimine	0.1	-597.434	-597.434	0	0	95	80	25	1-2	Imine	dx.doi.org/10.1039/P19880001317
170		CC(C)(C)/N=C/C1=CC=C(C)C=C1	(E)-N-tert-butyl-1-(p-tolyl)methanimine	0	-522.227	-522.227	0	0	89	80	25	1-2	Imine	dx.doi.org/10.1039/P19880001317
171		CC(C)(C)/N=C/C1=CC=C(Cl)C=C1	(E)-N-tert-butyl-1-(4-chlorophenyl)methanimine	0	-942.52	-942.52	0	0	88	80	25	1-2	Imine	dx.doi.org/10.1039/P19880001317
173		CC(C)(C)/N=C/C1=CC=C([N+]([O-])=O)C=C1	(E)-N-tert-butyl-1-(4-nitrophenyl)methanimine	0	-687.409	-687.409	0	0	0	80	25	1-2	Imine	dx.doi.org/10.1039/P19880001317
174		O=C([O-])C1=CC=C(C)C=C1	4-methylbenzoate	0.1	459.559	459.559	0	0	70	100	25	2	Ketone	dx.doi.org/10.1021/acs.orglett.5b01398
175		O=C([O-])C1=CC(C)=CC=C1	3-methylbenzoate	0.1	-459.559	-459.559	0	0	54	100	25	2	Ketone	dx.doi.org/10.1021/acs.orglett.7b00177
179		CC(NC1=CC=C(Cl)C=C1)=O	N-(4-chlorophenyl)acetamide	0.3	-899.842	-899.842	3.20025e-05	5.40141e-05	83	110	25	0.5	AmideNH	dx.doi.org/10.1021/jo00335a019
180		O=C(OCC)C1=CC=C(NC(C)=O)C=C1	ethyl 4-acetamidobenzoate	1.1	-707.426	-707.426	0.00273904	0.00462297	74	110	25	0.5	AmideNH	dx.doi.org/10.1021/jo00335a019
181		CC(NC1=CC=C(C(C)=O)C=C1)=O	N-(4-acetylphenyl)acetamide	0	-592.877	-592.877	0	0	94	110	25	0.5	AmideNH	dx.doi.org/10.1021/jo00335a019
182		CC(NC1=CC=CC(Cl)=C1)=O	N-(3-chlorophenyl)acetamide	0	-899.842	-899.842	0	0	74	110	25	0.5	AmideNH	dx.doi.org/10.1021/jo00335a019
183		O=C(OC)C1=CC=CC(NC(C)=O)=C1	methyl 3-acetamidobenzoate	0.6	-668.109	-668.109	0.000581065	0.000980725	63	110	25	0.5	AmideNH	dx.doi.org/10.1021/jo00335a019
184		CCC(NC1=CC=CC=C1)=O	N-phenylpropionamide	0	-479.546	-479.546	8.09475e-05	0.000136624	79	110	25	0.5	AmideNH	dx.doi.org/10.1021/jo00335a019
185		CC(C)C(NC1=CC=CC=C1)=O	N-phenylisobutyramide	0.8	-518.86	-518.86	0.000841477	0.00142025	93	110	25	0.5	AmideNH	dx.doi.org/10.1021/jo00335a019
186		CC(NC1=C2C=CC=CC2=CC=C1)=O	N-(naphthalen-1-yl)acetamide	22.9	-593.854	-593.854	0.105805	0.178578	87	25	25	1-10	AmideNH	dx.doi.org/10.1039/c3cc43479f
188		CC(NC1=CC=C(Cl)C(Cl)=C1)=O	N-(3,4-dichlorophenyl)acetamide	0	-1359.44	-1359.44	0	0	54	25	25	1-10	AmideNH	dx.doi.org/10.1039/c3cc43479f
189		CC(NC1=CC=CC(F)=C1)=O	N-(3-fluorophenyl)acetamide	0.8	-539.476	-539.476	0.00174445	0.00294429	95	25	25	1-10	AmideNH	dx.doi.org/10.1039/c3cc43479f
190		CC(NC1=CC(F)=CC(F)=C1)=O	N-(3,5-difluorophenyl)acetamide	1.2	-717.343	-717.343	0.0257375	0.04344	73	25	25	1-10	AmideNH	dx.doi.org/10.1039/c3cc43479f
191		CC(NC1=CC=C(C=C1)C2=C3C(C)=CC(C)=[N]3B(F)(N4C2=C(C=C4C)C)F)=O	N-(4-(5,5-difluoro-1,3,7,9-tetramethyl-5H-4l4,5l4-dipyrrolo[1,2-c:2',1'-f][1,3,2]diazaborinin-10-yl)phenyl)acetamide	1.3	-1277.66	-1277.66	0.00209585	0.00353739	35	25	25	1-10	AmideNH	dx.doi.org/10.1039/C4CC02969K
192		CC(NC1=CC=C(C=C1)OCC2=C3C(C)=CC(C)=[N]3B(F)(N4C2=C(C=C4C)C)F)=O	N-(4-((5,5-difluoro-1,3,7,9-tetramethyl-5H-4l4,5l4-dipyrrolo[1,2-c:2',1'-f][1,3,2]diazaborinin-10-yl)methoxy)phenyl)acetamide	0.1	-1392.17	-1392.17	-1.255e-05	-2.1182e-05	72	25	25	1-10	AmideNH	dx.doi.org/10.1039/C4CC02969K
193		CC(NC1=CC=C(OCCN2C3(C4=C(OC5=C3C=CC(O)=C5)C=C(O)C=C4)C6=C(C=CC=C6)C2=O)C=C1)=O	N-(4-(2-(3',6'-dihydroxy-3-oxospiro[isoindoline-1,9'-xanthen]-2-yl)ethoxy)phenyl)acetamide	1	-1718.43	-1718.43	0	0	60	25	25	1-10	AmideNH	dx.doi.org/10.1039/c3cc43479f
194		CC(NC1=CC=C(F)C(F)=C1)=O	N-(3,4-difluorophenyl)acetamide	0.7	-638.71	-638.71	0.000225273	0.000380216	85	25	25	4	AmideNH	dx.doi.org/10.1039/c3cc43479f
195		O=C(N(C)C)NC1=CC=CC(F)=C1	1-(3-fluorophenyl)-3,3-dimethylurea	2	-634.137	-634.137	0.00886657	0.0149651	90	25	25	2	UreaNH	dx.doi.org/10.1039/c3cc43479f
197		O=C(NC1=CC=CC(C)=C1)N(C)C	1,1-dimethyl-3-(m-tolyl)urea	1	-574.211	-574.211	0.00345439	0.00583034	79	50	25	1.5	UreaNH	dx.doi.org/10.1002/anie.200805842
198		CCC1=CC=CC=C1/N=N/C2=CC=CC=C2CC	(E)-1,2-bis(2-ethylphenyl)diazene	17.3	-729.947	-729.947	0.0215766	0.0364171	95	25	25	1	Azo	dx.doi.org/10.1021/ja01092a063
204		C1(/C=N/N=C/C2=CC=CC=C2)=CC=CC=C1	1,2-di((E)-benzylidene)hydrazine	0	-650.104	-650.104	0	0	77	118	25	0.75	Imine	dx.doi.org/10.1021/jo00906a021
205		C/C(C1=CC=CC=C1)=N\N(C)C	(E)-1,1-dimethyl-2-(1-phenylethylidene)hydrazine	16.4	-498.912	-498.912	0.22056	0.372263	61	118	25	1	Imine	dx.doi.org/10.1021/jo00906a021
208		O=C(NC1=CC=CC=C1)N(C)C	1,1-dimethyl-3-phenylurea	1.9	-534.895	-534.895	0.018446	0.0311333	87	25	25	1-10	UreaNH	dx.doi.org/10.1039/C4CC02969K
210		O=C(OCC)NC1=CC=CC=C1	ethyl phenylcarbamate	0	-554.777	-554.777	0	0	75	25	25	0.5	CarbamideNH	dx.doi.org/10.1039/C4CC02969K
211		O=C(OC)NC1=CC=CC=C1	methyl phenylcarbamate	0	-515.446	-515.446	0	0	80	25	25	0.5	CarbamideNH	dx.doi.org/10.1039/C4CC02969K
212		O=C(OC(C)C)NC1=CC=CC=C1	isopropyl phenylcarbamate	1.1	-594.081	-594.081	0.0194481	0.0328246	80	25	25	0.5	CarbamideNH	dx.doi.org/10.1039/C4CC02969K
213		O=C(OCCOCCOCCOC)NC1=CC=CC=C1	2-(2-(2-methoxyethoxy)ethoxy)ethyl phenylcarbamate	0	-976.931	-976.931	0	0	90	25	25	0.5	CarbamideNH	dx.doi.org/10.1039/C4CC02969K
214		O=C(OCC)NC1=CC=C(OC)C=C1	ethyl (4-methoxyphenyl)carbamate	9.5	-669.282	-669.282	0.00297498	0.00502119	70	25	25	0.5	CarbamideNH	dx.doi.org/10.1039/C4CC02969K
215		O=C(OCC)NC1=CC=C(OC)C(OC)=C1	ethyl (3,4-dimethoxyphenyl)carbamate	5.6	-783.796	-783.796	0.00781049	0.0131826	30	25	25	0.5	CarbamideNH	dx.doi.org/10.1039/C4CC02969K
216		O=C(OC)NC1=CC=C(OC)C(C)=C1	methyl (4-methoxy-3-methylphenyl)carbamate	0	-669.282	-669.282	0	0	65	25	25	0.5	CarbamideNH	dx.doi.org/10.1039/C4CC02969K
217		O=C(OC)NC1=CC=C(C)C=C1	methyl p-tolylcarbamate	0	-554.762	-554.762	-3.76503e-06	-6.35465e-06	75	25	25	0.5	CarbamideNH	dx.doi.org/10.1039/C4CC02969K
218		O=C(OC)NC1=CC=CC(C)=C1	methyl m-tolylcarbamate	0.2	-554.762	-554.762	9.41247e-06	1.58864e-05	45	25	25	0.5	CarbamideNH	dx.doi.org/10.1039/C4CC02969K
219		O=C(OC)NC1=CC=C(F)C=C1	methyl (4-fluorophenyl)carbamate	0	-614.687	-614.687	0	0	72	25	25	0.5	CarbamideNH	dx.doi.org/10.1039/C4CC02969K
220		O=C(OC)NC1=CC=CC(F)=C1	methyl (3-fluorophenyl)carbamate	0	-614.688	-614.688	0	0	70	25	25	0.5	CarbamideNH	dx.doi.org/10.1039/C4CC02969K
221		O=C(OC)NC1=CC=C(Cl)C=C1	methyl (4-chlorophenyl)carbamate	0	-975.053	-975.053	0	0	60	25	25	0.5	CarbamideNH	dx.doi.org/10.1039/C4CC02969K
222		CC1=CC=CC=C1/C=N/C2=CC=CC=C2	(E)-N-phenyl-1-(o-tolyl)methanimine	3.3	-596	-596	0.00809412	0.0136613	95	56	25	#N/A	Imine	dx.doi.org/10.1021/jo00415a024
223		COC1=CC=CC=C1/C=N/C2=CC=CC=C2	(E)-1-(2-methoxyphenyl)-N-phenylmethanimine	1.6	-671.206	-671.206	0.00227218	0.003835	94	56	25	#N/A	Imine	dx.doi.org/10.1021/jo00415a024
224		ClC1=CC=CC=C1/C=N/C2=CC=CC=C2	(E)-1-(2-chlorophenyl)-N-phenylmethanimine	0.4	-1016.29	-1016.29	0.0002008	0.000338912	95	56	25	#N/A	Imine	dx.doi.org/10.1021/jo00415a024
225		CC([C@@H]1N=C(C2=CC=CC=C2)OC1)C	(4S)-4-isopropyl-2-phenyl-4,5-dihydro-1,3-oxazole	1.5	-596.247	-596.247	0.00279488	0.00471723	96	25	25	1.16667	Imine	dx.doi.org/10.1002/1615-4169(20010330)343:3%3C260::AID-ADSC260%3E3.0.CO;2-8
226		CC1=CC=CN=C1C2=CC=CC=C2	3-methyl-2-phenylpyridine	46.9	-518.602	-518.596	3.71981	6.27831	96	25	25	1.16667	Py	dx.doi.org/10.1021/ja051402f
229		CN1C(C2=CC=CC=C2)=NC3=CC=CC=C13	1-methyl-2-phenyl-1H-benzo[d]imidazole	40.5	-650.171	-650.166	2.61716	4.41725	74	60	25	6	Imine	dx.doi.org/10.1016/0022-328X(96)06218-3
230		C1(C2=CC=CC=C2)=NC3=CC=CC=C3S1	2-phenylbenzo[d]thiazole	5.4	-953.702	-953.702	0.000419798	0.000708537	74	60	25	6	Imine	dx.doi.org/10.1016/0022-328X(96)06218-3
232		O=C(C1=CC=CC=C1)C2=NC=CC=C2	phenyl(pyridin-2-yl)methanone	25.4	-592.607	-592.605	1.05751	1.78487	81	50	25	3.5	Py	dx.doi.org/10.1016/S0020-1693(00)00216-4
233		C1(C2=CC=CC=C2)=NOC(C3=CC=CC=C3)=C1	3,5-diphenylisoxazole	19.6	-708.081	-708.081	0.0831312	0.140309	99	80	25	24	Imine	dx.doi.org/10.1248/cpb.37.1694
234		C1(C2=CC=CC=C2)=NC=C(C3=CC=CC=C3)O1	2,5-diphenyloxazole	0	-708.124	-708.124	0	0	94	80	25	24	Imine	dx.doi.org/10.1248/cpb.37.1694
235		C1(C2=CC=CC=C2)=NC3=C4C=CC=CC4=CC=C3O1	2-phenylnaphtho[1,2-d]oxazole	0	-784.346	-784.346	0	0	82	100	25	6	Imine	dx.doi.org/10.1016/j.poly.2007.05.031
236		CC1=CC=C(C2=NC3=C4C=CC=CC4=CC=C3O2)C=C1	2-(p-tolyl)naphtho[1,2-d]oxazole	0.1	-823.663	-823.663	0	0	78	100	25	6	Imine	dx.doi.org/10.1016/j.poly.2007.05.031
237		COC1=CC=C(C2=NC3=C4C=CC=CC4=CC=C3O2)C=C1	2-(4-methoxyphenyl)naphtho[1,2-d]oxazole	0.1	-898.868	-898.868	0	0	76	100	25	6	Imine	dx.doi.org/10.1016/j.poly.2007.05.031
238		O=C(C1=CC=C(Cl)C=C1)C2CCCCC2	(4-chlorophenyl)(cyclohexyl)methanone	4.6	-1039.83	-1039.83	0.016886	0.0285003	65	120	25	3	Ketone	dx.doi.org/10.1021/ja1026248
239		O=C(C12CC3CC(C2)CC(C3)C1)C4=CC=C(C)C(C)=C4	adamantan-1-yl-(3,4-dimethyl-phenyl)-methanone	23.9	-813.698	-813.697	0.189207	0.319345	98	40	25	0.0833333	Ketone	dx.doi.org/10.1021/ja108450m
241		CC(C)(C)C(C1=CC=CC=C1)=O	2,2-dimethyl-1-phenylpropan-1-one	27.3	-502.796	-502.796	0.206782	0.349008	70	50	25	ON	Ketone	dx.doi.org/10.1002/anie.201207479
243		O=C(C12CC3CC(C2)CC(C3)C1)C4=CC=C(C)C=C4	adamantan-1-yl(p-tolyl)methanone	23.6	-774.381	-774.381	0.134916	0.227713	92	25	25	24	Ketone	dx.doi.org/10.1002/anie.201207458
244		O=CC1=CC=CC2=C3N=CC=CC3=CC=C21	benzo[h]quinoline-7-carbaldehyde	0	-668.823	-668.823	0	0	96	100	25	0.166667	Py	dx.doi.org/10.1021/ja1036644
245		ClC1=CC=CC2=C3N=CC=CC3=CC=C21	7-chlorobenzo[h]quinoline	0	-1015.12	-1015.12	0	0	92	100	25	0.166667	Py	dx.doi.org/10.1021/ja1036644
246		IC1=CC=CC2=C3N=CC=CC3=CC=C21	7-iodobenzo[h]quinoline	0	-566.297	-566.297	0	0	92	100	25	0.166667	Py	dx.doi.org/10.1021/ja1036644
247		CC1=CC=CC2=C3N=CC=CC3=CC=C21	7-methylbenzo[h]quinoline	0	-594.825	-594.825	0	0	92	100	25	0.166667	Py	dx.doi.org/10.1021/ja1036644
248		CC(CO1)(C)N=C1C2=CC=CC=C2	4,4-dimethyl-2-phenyl-4,5-dihydrooxazole	1.4	-556.937	-556.937	0.00201616	0.00340288	90	95	25	12.5	Imine	dx.doi.org/10.1016/0022-328X(90)85416-V
250		CC(CO1)(C)N=C1C2=CC=CC=C2C	4,4-dimethyl-2-(o-tolyl)-4,5-dihydrooxazole	29.6	-596.249	-596.248	0.25852	0.436332	96	95	25	12.5	Imine	dx.doi.org/10.1016/0022-328X(90)85416-V
251		CC(CO1)(C)N=C1C2=CC=CC=C2OC	2-(2-methoxyphenyl)-4,4-dimethyl-4,5-dihydrooxazole	41.8	-671.451	-671.449	0.815003	1.37557	94	95	25	12.5	Imine	dx.doi.org/10.1016/0022-328X(90)85416-V
252		CC1(C)N=C(C2=CC=C(OC)C=C2)OC1	2-(4-methoxyphenyl)-4,4-dimethyl-4,5-dihydrooxazole	1.8	-671.459	-671.459	0.00429147	0.00724318	88	95	25	12.5	Imine	dx.doi.org/10.1016/0022-328X(90)85416-V
253		CC1(C)N=C(C2=CC=C(OC)C(OC)=C2)OC1	2-(3,4-dimethoxyphenyl)-4,4-dimethyl-4,5-dihydrooxazole	1.5	-785.972	-785.972	0.00266248	0.00449376	87	95	25	12.5	Imine	dx.doi.org/10.1016/0022-328X(90)85416-V
254		CC(CO1)(C)N=C1C2=CC=C([N+]([O-])=O)C=C2	4,4-dimethyl-2-(4-nitrophenyl)-4,5-dihydrooxazole	0.1	-761.432	-761.432	0	0	95	95	25	12.5	Imine	dx.doi.org/10.1016/0022-328X(90)85416-V
255		CC(CO1)(C)N=C1C2=CC=CC([N+]([O-])=O)=C2	4,4-dimethyl-2-(3-nitrophenyl)-4,5-dihydrooxazole	1	-761.433	-761.433	0	0	98	95	25	12.5	Imine	dx.doi.org/10.1016/0022-328X(90)85416-V
256		CC(CO1)(C)N=C1C2=CC=C(Cl)C=C2	2-(4-chlorophenyl)-4,4-dimethyl-4,5-dihydrooxazole	1.3	-1016.54	-1016.54	0.0021586	0.0036433	82	95	25	12.5	Imine	dx.doi.org/10.1016/0022-328X(90)85416-V
257		CC(O1)(C)CN=C1C2=CC=CC=C2	5,5-dimethyl-2-phenyl-4,5-dihydrooxazole	1.4	-556.937	-556.937	0.0020149	0.00340077	96	95	25	12.5	Imine	dx.doi.org/10.1016/0022-328X(90)85416-V
261		CC1=CC(C2=CC=CC=N2)=CC=C1	2-(m-tolyl)pyridine	27.6	-518.604	-518.603	0.472954	0.798254	72	118	25	12	Py	dx.doi.org/10.1016/S0022-328X(03)00457-1
262		CC(C=C1)=CC=C1C2=CC=CC=N2	2-(p-tolyl)pyridine	26.2	-518.604	-518.604	0.370502	0.625335	48	118	25	12	Py	dx.doi.org/10.1016/S0022-328X(03)00457-1
263		COC1=CC=CC=C1C2=CC=CC=N2	2-(2-methoxyphenyl)pyridine	36	-593.804	-593.801	1.90786	3.2201	62	118	25	12	Py	dx.doi.org/10.1016/S0022-328X(03)00457-1
264		COC1=CC(C2=CC=CC=N2)=CC=C1	2-(3-methoxyphenyl)pyridine	27.3	-593.809	-593.808	0.419847	0.708621	41	118	25	12	Py	dx.doi.org/10.1016/S0022-328X(03)00457-1
266		COC(C=C1)=CC=C1C2=CC=CC=N2	2-(4-methoxyphenyl)pyridine	25	-593.809	-593.809	0.343542	0.579832	60	118	25	12	Py	dx.doi.org/10.1016/S0022-328X(03)00457-1
267		[O-][N+](C1=CC=CC=C1C2=CC=CC=N2)=O	2-(2-nitrophenyl)pyridine	44.2	-683.777	-683.771	3.82092	6.44897	42	118	25	12	Py	dx.doi.org/10.1016/S0022-328X(03)00457-1
268		O=[N+]([O-])C1=CC(C2=CC=CC=N2)=CC=C1	2-(3-nitrophenyl)pyridine	24.5	-683.785	-683.785	0.348404	0.588038	66	61	25	12	Py	dx.doi.org/10.1016/S0022-328X(03)00457-1
270		O=[N+]([O-])C(C=C1)=CC=C1C2=CC=CC=N2	2-(4-nitrophenyl)pyridine	26.5	-683.785	-683.784	0.410425	0.692718	37	118	25	12	Py	dx.doi.org/10.1016/S0022-328X(03)00457-1
271		ClC1=CC=CC=C1C2=CC=CC=N2	2-(2-chlorophenyl)pyridine	47.5	-938.892	-938.886	3.52853	5.95547	19	118	25	12	Py	dx.doi.org/10.1016/S0022-328X(03)00457-1
272		ClC(C=C1)=CC=C1C2=CC=CC=N2	2-(4-chlorophenyl)pyridine	25.7	-938.896	-938.896	0.350624	0.591786	31	118	25	12	Py	dx.doi.org/10.1016/S0022-328X(03)00457-1
273		BrC(C=C1)=CC=C1C2=CC=CC=N2	2-(4-bromophenyl)pyridine	25.9	-3052.86	-3052.86	0.361352	0.609893	67	118	25	12	Py	dx.doi.org/10.1016/S0022-328X(03)00457-1
275		BrC1=CC=CC=C1C2=CC=CC=N2	2-(2-bromophenyl)pyridine	51.2	-3052.86	-3052.85	4.4735	7.5504	0	118	25	12	Py	dx.doi.org/10.1016/S0022-328X(03)00457-1
277		O=C(C)/N=N\C1=CC=CC=C1	(Z)-1-(phenyldiazenyl)ethan-1-one	7.4	-494.304	-494.304	0.0380993	0.0643042	#N/A	25	25	#N/A	Azo
278		O=C(NC1=C(N=CC=C2)C2=CC=C1)C3=C(C)C=CC=C3	2-methyl-N-(quinolin-8-yl)benzamide	45.5	-840.928	-840.924	2.35796	3.97978	46	60	25	4	BenzamideNH	dx.doi.org/10.1021/ol502439m
279		O=C(NC1=C2N=CC=CC2=CC=C1)C3=CC=CC(OC)=C3	3-methoxy-N-(quinolin-8-yl)benzamide	23.9	-916.135	-916.135	0.277584	0.468508	90	60	25	4	BenzamideNH	dx.doi.org/10.1021/ja511557h
280		O=C(N(C)C1=CC=CC=C1)C2=CC=CC(OC)=C2	3-methoxy-N-methyl-N-phenylbenzamide	55.5	-785.76	-785.753	4.69796	7.92925	58	40	25	2.5	BenzamideNR	dx.doi.org/10.1016/j.ica.2011.01.059
			aniline	49.9	-785.76	-785.758	1.67654	2.82967	0	40	25	3	AmideNR
281		O=C(N(C)C1=CC=CC=C1C)C2=CC=CC(OC)=C2	3-methoxy-N-methyl-N-(o-tolyl)benzamide	54.5	-825.079	-825.071	5.33446	9.00354	65	40	25	2.5	BenzamideNR	dx.doi.org/10.1016/j.ica.2011.01.059
			aniline	105.9	-825.079	-825.062	10.7688	18.1756	0	40	25	3	AmideNR
282		O=C(N(C)C1=CC=CC=C1)C2=CC=C(OC)C(OC)=C2	3,4-dimethoxy-N-methyl-N-phenylbenzamide	33.5	-900.282	-900.279	2.27435	3.83867	47	40	25	2.5	BenzamideNR	dx.doi.org/10.1016/j.ica.2011.01.059
			aniline	48.4	-900.282	-900.271	6.87665	11.6064	0	40	25	3	AmideNR
283		O=C([C@H]1N=C(C2=CC=CC=C2)OC1)OC	(S)-4-carbomethoxy-2-phenyloxazoline	0.1	-706.171	-706.171	0	0	84	118	25	2	Imine	dx.doi.org/10.1021/om049687c
284		[H]C(C1=CC=CC=C1)/N=C(C(C2=CC=CC=C2)=O)/C3=CC=CC=C3	(Z)-2-(benzylimino)-1,2-diphenylethan-1-one	3.1	-940.34	-940.34	0.025452	0.0429581	60	118	25	2	Imine	dx.doi.org/10.1021/om00034a052
285		CC(C1=CC=CC=C1)/N=C(C(C2=CC=CC=C2)=O)/C3=CC=CC=C3	(Z)-1,2-diphenyl-2-((1-phenylethyl)imino)ethan-1-one	2.6	-979.656	-979.656	0.00857604	0.0144747	60	118	25	2	Imine	dx.doi.org/10.1021/om00034a052
286		CC(C)[C@@H]1N=C(OC1)C2=CC=CC=C2	(S)-4-isopropyl-2-phenyl-4,5-dihydrooxazole	1.6	-596.247	-596.247	0.00285575	0.00481996	92	95	25	1.9166	Imine	doi.org/10.1002/1615-4169(20010330)343:3<260::AID-ADSC260>3.0.CO;2-8
287		O=C(N(C)OC)C1=CC=CC=C1	N-methoxy-N-methylbenzamide	42.4	-554.685	-554.679	3.68589	6.22106	#N/A	25	25	#N/A	BenzamideNR
288		O=C(N(C)OC)C1=CC=CC=C1C	N-methoxy-N,2-dimethylbenzamide	67.9	-594.001	-593.988	8.24163	13.9103	#N/A	25	25	#N/A	BenzamideNR
289		O=C(NOC)C1=CC=CC=C1C	N-methoxy-2-methylbenzamide	57.1	-554.694	-554.691	1.97829	3.33896	#N/A	25	25	#N/A	BenzamideNH
290		O=C(C)C1=CN(C)C2=C1C=CC=C2	1-(1-methyl-1H-indol-3-yl)ethan-1-one	0	-555.736	-555.736	0	0	82	40	25	1	Ketone
291		O=C(C)C1=CSC2=C1C=CC=C2	1-(benzo[b]thiophen-3-yl)ethan-1-one	0	-859.265	-859.265	0	0	#N/A	25	25	#N/A	Ketone
292		O=C(N(C)C)N(C)C1=CC=CC=C1	1,1,3-trimethyl-3-phenylurea	33.5	-574.19	-574.185	3.09116	5.21729	#N/A	25	25	#N/A	UreaNR
293		O=C(NC1CCCCC1)N2C3=CC=CC=C3CC2	N-cyclohexylindoline-1-carboxamide	5.6	-768.374	-768.374	0.039353	0.0664203	#N/A	25	25	#N/A	UreaNH
294		O=C(N1CCCC1)C2=CC=CC=C2C	pyrrolidin-1-yl(o-tolyl)methanone	83.1	-596.269	-596.251	11.2313	18.9563	#N/A	25	25	#N/A	BenzamideNR
295		O=C(N1CCCC1)C2=CC=CC(C)=C2	pyrrolidin-1-yl(m-tolyl)methanone	43.8	-596.269	-596.263	3.4004	5.73921	#N/A	25	25	#N/A	BenzamideNR
296		O=C(N(CC)CC)C1=CC=CC(C)=C1	N,N-diethyl-3-methylbenzamide	55.4	-597.477	-597.469	5.33549	9.00527	#N/A	25	25	#N/A	BenzamideNR
297		O=C(N(CC)CC)C1=CC=CC=C1C	N,N-diethyl-2-methylbenzamide	89.4	-597.479	-597.454	15.8137	26.6904	#N/A	25	25	#N/A	BenzamideNR
298		O=C(NCCCC)C1=CC=CC=C1	N-butylbenzamide	28.6	-558.171	-558.17	0.609426	1.02859	#N/A	25	25	#N/A	BenzamideNH
299		O=C(N(CCCC)C)C1=CC=CC=C1	N-butyl-N-methylbenzamide	55.4	-597.471	-597.462	5.69896	9.61875	#N/A	25	25	#N/A	BenzamideNR
300		O=C(N(CCCC)C)C1=CC=CC=C1C	N-butyl-N,2-dimethylbenzamide	106.8	-636.789	-636.771	11.1032	18.74	#N/A	25	25	#N/A	BenzamideNR
301		O=C(NCCCC)C1=CC=CC=C1C	N-butyl-2-methylbenzamide	48.4	-597.485	-597.482	2.09954	3.54361	#N/A	25	25	#N/A	BenzamideNH
302		CC1=CC(C(NC(C)(C)C)=O)=CC=C1	N-(tert-butyl)-3-methylbenzamide	28.8	-597.493	-597.492	0.668071	1.12757	#N/A	25	25	#N/A	BenzamideNH
303		CC1=CC(C(N(C)C(C)(C)C)=O)=CC=C1	N-(tert-butyl)-N,3-dimethylbenzamide	42.2	-636.785	-636.779	3.89681	6.57707	#N/A	25	25	#N/A	BenzamideNR
304		O=C(NC(C)(C)C)C1=C(C)C=CC=C1	N-(tert-butyl)-2-methylbenzamide	54.5	-597.49	-597.486	2.54344	4.29283	#N/A	25	25	#N/A	BenzamideNH
305		O=C(N(C)C(C)(C)C)C1=C(C)C=CC=C1	N-(tert-butyl)-N,2-dimethylbenzamide	64.5	-636.785	-636.771	9.07676	15.3198	#N/A	25	25	#N/A	BenzamideNR
306		O=C(NC(C)C)C1=CC=CC=C1C	N-isopropyl-2-methylbenzamide	53.3	-558.176	-558.172	2.16303	3.65077	#N/A	25	25	#N/A	BenzamideNH
307		CC1=CC(C(N(C(C)C)C(C)C)=O)=CC=C1	N,N-diisopropyl-3-methylbenzamide	61	-676.101	-676.089	7.52171	12.6952	#N/A	25	25	#N/A	BenzamideNR
308		O=C(N(C(C)C)C(C)C)C1=C(C)C=CC=C1	N,N-diisopropyl-2-methylbenzamide	94.2	-676.107	-676.083	14.9864	25.2942	#N/A	25	25	#N/A	BenzamideNR
309		O=C(NC1=C(C)C=CC=C1C)C2=CC=CC(C)=C2	N-(2,6-dimethylphenyl)-3-methylbenzamide	34.1	-749.894	-749.89	2.10372	3.55068	#N/A	25	25	#N/A	BenzamideNH
310		O=C(NC1=C(C)C=CC=C1C)C2=CC=CC=C2C	N-(2,6-dimethylphenyl)-2-methylbenzamide	52.9	-749.891	-749.878	8.02361	13.5423	#N/A	25	25	#N/A	BenzamideNH
312		O=C(C)N(C=N1)C2=C1C=CC=C2	1-(1H-benzo[d]imidazol-1-yl)ethan-1-one	0	-532.476	-532.476	0	0	#N/A	25	25	#N/A	AmideNR
313		CC1=CC(NC(C)=O)=NO1	N-(5-methylisoxazol-3-yl)acetamide	1	-493.355	-493.355	0.0009538	0.00160983	#N/A	25	25	#N/A	AmideNH
314		O=C1N(C2=CC=CC=C2C)CCC1	1-(o-tolyl)pyrrolidin-2-one	116.8	-556.962	-556.948	8.82235	14.8904	#N/A	25	25	#N/A	AmideNR
315		O=C1C2=C(C(N1C3=CC=CC=C3)=O)C=CC=C2	2-phenylisoindoline-1,3-dione	50.1	-744.076	-744.071	3.09801	5.22884	0	40	25	1	Imide
316		CC(NC1=CC=CC=C1Cl)=O	N-(2-chlorophenyl)acetamide	0.7	-899.843	-899.843	0.00193646	0.00326838	86	50	25	2	AmideNH	doi.org/10.1002/hlca.19920750807
317		CC(NC1=C(Cl)C=CC(C)=C1)=O	N-(2-chloro-5-methylphenyl)acetamide	0.2	-939.159	-939.159	0.000272335	0.000459649	0	70	25	20	AmideNH	doi.org/10.1002/hlca.19920750807
320		O=C(C(C)(C)C)NC1=CC=CC=C1C	N-(o-tolyl)pivalamide	0	-597.49	-597.49	0	0	#N/A	25	25	#N/A	AmideNH
321		O=C(C(C)(C)C)N(C)C1=CC=CC=C1	N-methyl-N-phenylpivalamide	88.6	-597.463	-597.456	4.26959	7.20625	#N/A	25	25	#N/A	AmideNR
322		CC1=CC(NC(C)=O)=CC(C)=C1	N-(3,5-dimethylphenyl)acetamide	0	-518.867	-518.867	0	0	#N/A	25	25	#N/A	AmideNH
323		O=C(C1=CC=CC=C1)N(C)C2=CC=CC=C2	N-methyl-N-phenylbenzamide	51.4	-671.239	-671.232	4.41501	7.45169	0	70	25	1	BenzamideNR
			aniline	51.2	-671.239	-671.237	1.73824	2.93381	0	70	25	1	AmideNR
324		O=C(NC12C[C@H]3C[C@H](C[C@H](C3)C2)C1)C4=CC=CC=C4	N-((3s,5s,7s)-adamantan-1-yl)benzamide	27.9	-790.445	-790.444	0.633673	1.06952	82	25	25	24	BenzamideNH	dx.doi.org/10.1021/acs.orglett.7b01859
325		O=C(C1=CC=CC=C1)NC2=C(F)C(F)=C(C(F)(F)F)C(F)=C2F	N-(2,3,5,6-tetrafluoro-4-(trifluoromethyl)phenyl)benzamide	24.6	-1365.93	-1365.93	0.778458	1.31389	99	130	25	12	BenzamideNH	dx.doi.org/10.1021/ja305259n
326		O=C(NC1=CC=CC=C1C)C2=CC=CC=C2	N-(o-tolyl)benzamide benzamidos:	28.6	-671.262	-671.26	0.682678	1.15223	0	40	25	1	BenzamideNH
			aniline	2.7	-671.262	-671.261	0.0544833	0.0919573	67	40	25	1	AmideNH
327		O=C(NC1=CC=CC=C1)C2=CC=CC=C2C	2-methyl-N-phenylbenzamide	50.5	-671.259	-671.255	2.77183	4.67832	0	40	25	1	BenzamideNH
			aniline	0.6	-671.259	-671.259	0.0559805	0.0944843	85	40	25	1	AmideNH
328		O=C(NC1=CC=CC=C1C)C2=CC=CC=C2C	2-methyl-N-(o-tolyl)benzamide	49.2	-710.575	-710.571	2.6486	4.47033	0	25	25	1	BenzamideNH
			aniline	1.3	-710.575	-710.575	0.0371712	0.0627378	63	25	25	1	AmideNH
329		O=C(NC1=CC=CC=C1)C2=CC=CC(OC)=C2	3-methoxy-N-phenylbenzamide	30.1	-746.466	-746.465	0.793102	1.3386	73	40	25	1	BenzamideNH
			aniline	5.8	-746.466	-746.466	0.0547525	0.0924117	0	40	25	1	AmideNH
330		O=C(NC1=CC=CC(OC)=C1)C2=CC=CC=C2	N-(3-methoxyphenyl)benzamide	29.3	-746.466	-746.465	0.736095	1.24239	0	25	25	1	BenzamideNH
			aniline	6.2	-746.466	-746.466	0.0672291	0.11347	96	25	25	1	AmideNH
331		O=C(NC1=CC=CC=C1C)C2=CC=C(OC)C=C2	4-methoxy-N-(o-tolyl)benzamide	24.7	-785.784	-785.783	0.491777	0.830024	0	40	25	1	BenzamideNH
			aniline	4.6	-785.784	-785.783	0.0429668	0.0725197	63	40	25	1	AmideNH
332		O=C(NC1=CC=CC=C1C)C2=CC=C([N+]([O-])=O)C=C2	4-nitro-N-(o-tolyl)benzamide	30.4	-875.756	-875.754	0.796747	1.34475	0	40	25	1	BenzamideNH
			aniline	8.5	-875.756	-875.756	0.0401142	0.067705	68	40	25	1	AmideNH
333		O=C(N(C)C1=CC=CC=C1C)C2=CC=CC=C2	N-methyl-N-(o-tolyl)benzamide	48.3	-710.559	-710.551	4.65414	7.85529	0	40	25	1	BenzamideNR
			aniline	103.5	-710.559	-710.541	10.7818	18.1976	0	40	25	1	AmideNR
334		O=C(N(C)C1=CC=CC=C1)C2=CC=CC=C2C	N,2-dimethyl-N-phenylbenzamide	85	-710.557	-710.539	11.1567	18.8304	0	40	25	1	BenzamideNR
			aniline	50.6	-710.557	-710.554	1.71702	2.898	64	40	25	1	AmideNR
335		O=C(N(C)C1=CC=CC=C1C)C2=CC=CC=C2C	N,2-dimethyl-N-(o-tolyl)benzamide	76.1	-749.876	-749.856	12.6092	21.2818	0	40	25	1	BenzamideNR
			aniline	104.6	-749.876	-749.857	11.8054	19.9252	0	40	25	1	AmideNR
336		O=C(N(C1=CC=CC(OC)=C1)C)C2=CC=CC=C2	N-(3-methoxyphenyl)-N-methylbenzamide	54.2	-785.76	-785.753	4.68693	7.91064	0	40	25	1	BenzamideNR
			aniline	49.2	-785.76	-785.758	1.70057	2.87023	54	40	25	1	AmideNR
337		CN(C(C1=CC=CC(OC)=C1)=O)C2=CC=CC(OC)=C2	3-methoxy-N-(3-methoxyphenyl)-N-methylbenzamide	50.1	-900.281	-900.273	4.81335	8.12401	#N/A	25	25	#N/A	BenzamideNR
			aniline	70.3	-900.281	-900.278	1.66597	2.81184	#N/A	25	25	#N/A	AmideNR
338		O=C(CCC1)N1C2=CC=CC=C2C3=CC=CC=C3	1-([1,1'-biphenyl]-2-yl)pyrrolidin-2-one	82.5	-748.678	-748.666	7.39235	12.4769	#N/A	25	25	#N/A	AmideNR
339		O=C(C1=CC=CC(OC)=C1)NC2=CC=CC(OC)=C2	3-methoxy-N-(3-methoxyphenyl)benzamide	30.1	-860.987	-860.986	0.809859	1.36689	#N/A	25	25	#N/A	BenzamideNH
			aniline	5.6	-860.987	-860.987	0.0577105	0.0974042	#N/A	25	25	#N/A	AmideNH

## Sheet: SumUps - Graphs
AmideNR	AmideNH	Imide	Py	UreaNH	UreaNR	CarbamideNH	CarbamideNR	BenzamideNH	BenzamideNR	GuanidineNH	GuanidineNR	TioamideNR	Het	Azo	Imine	Ketone
AmideNR	AmideNH	Imide	Py	UreaNH	UreaNR	CarbamideNH	CarbamideNR	BenzamideNH	BenzamideNR	GuanidineNH	GuanidineNR	TioamideNR	Het	Azo	Imine	Ketone
27	51	8	25	8	3	14	3	31	21	2	1	2	4	3	50	18	271	CrossCheck: OK
22.2576	0.318309	19.3964	15.5041	0.324033	10.5978	0.0194481	11.9176	8.73238	15.8137	0.142103	3.00789	19.565	3.56517	0.0380993	5.30994	0.922813	Max ΔGrot
0	-1.255e-05	3.07032	0	0.00345439	2.48926	-3.76503e-06	0.370733	0.277584	2.27435	0.1152	3.00789	9.21086	0.0318048	0	-0.00176704	-1.757e-05	Min ΔGrot
37.5665	0.537245	32.7373	26.1679	0.546905	17.8871	0.0328246	20.1146	14.7386	26.6904	0.239842	5.07673	33.0219	6.01732	0.0643042	8.96215	1.55753	ΔGrot/RT max
0	-2.1182e-05	5.18211	0	0.00583034	4.20139	-6.35465e-06	0.625725	0.468508	3.83867	0.194435	5.07673	15.5462	0.0536804	0	-0.00298242	-2.96548e-05	ΔGrot/RT min
142	44.9	92	93.5	25.2	111	9.5	110	67.2	106.8	4.6	51.1	91.3	51.5	17.3	68.2	35.1	Max Dihedral Angle
0	0	50.1	0	1	33.5	0	21.6	23.9	33.5	2.52	51.1	89.5	14.2	0	0	0	Min Dihedral Angle
5.27018	0.024166	10.518	1.9118	0.0634021	5.39275	0.00215994	4.76578	1.68535	7.36354	0.128651	3.00789	14.3879	1.29026	0.019892	0.274493	0.0916073	Avarage ΔGrot
3.29493	8.09475e-05	12.0261	0.419847	0.034301	3.09116	0	2.009	0.809859	5.33549	0.128651	3.00789	14.3879	0.782027	0.0215766	0.00121735	2.72962e-05	Median ΔGrot
8.89504	0.0407875	17.7523	3.22675	0.10701	9.10192	0.00364557	8.04372	2.84455	12.4282	0.217139	5.07673	24.284	2.17771	0.0335738	0.463291	0.154615	Avarage ΔGrot/RT
5.5612	0.000136624	20.2977	0.708621	0.0578935	5.21729	0	3.39081	1.36689	9.00527	0.217139	5.07673	24.284	1.31991	0.0364171	0.00205465	4.60708e-05	Median ΔGrot/RT
63.8667	3.30651	66.5625	29.036	8.6	66.7667	1.17143	60.5667	36.1774	62.6048	3.56	51.1	90.4	32.775	8.23333	7.708	9.56111	Avarage Dihedral Angle
52.1	0.332	62.9	26.5	6.65	55.8	0	50.1	30.1	55.4	3.56	51.1	90.4	32.7	7.4	1.25	0.1	Median Dihedral Angle
87	99	0	99	90	0	90	0	99	65	0	0	0	0	95	99	98	Max Yield
0	0	0	0	79	0	30	0	0	0	0	0	0	0	91	0	54	Min Yield
13	41	3	22	3	0	12	0	15	8	0	0	0	0	2	43	9	171	CrossCheck: OK
27.3846	72.9512	0	65.3182	85.3333	#DIV/0!	67.6667	#DIV/0!	43.6667	21.25	#DIV/0!	#DIV/0!	#DIV/0!	#DIV/0!	93	84.2093	77.3333	Avarage Yield
0	79	0	66.5	87	#NUM!	71	#NUM!	46	0	#NUM!	#NUM!	#NUM!	#NUM!	93	89	75	Median Yield
1.81353	0.105805	0	3.82092	0.018446	0	0.0194481	0	2.35796	5.33446	0	0	0	0	0.0215766	2.61716	0.206782	ΔGrot Max (Non-0 Yield)
0.0816698	-1.255e-05	0	0	0.00345439	0	-3.76503e-06	0	0.277584	2.27435	0	0	0	0	0	-0.00176704	-1.757e-05	ΔGrot Min (Non-0 Yield)
3.06089	0.178578	0	6.44897	0.0311333	0	0.0328246	0	3.97978	9.00354	0	0	0	0	0.0364171	4.41725	0.349008	ΔGrot/RT max (Non-0 Yield)
0.137843	-2.1182e-05	0	0	0.00583034	0	-6.35465e-06	0	0.468508	3.83867	0	0	0	0	0	-0.00298242	-2.96548e-05	ΔGrot/RT Min (Non-0 Yield)
50.6	22.9	0	47.5	2	0	9.5	0	45.5	55.5	0	0	0	0	17.3	41.8	27.8	Max Dihedral Angle (Non-0 Yield)
2.4	0	0	0	1	0	0	0	23.9	33.5	0	0	0	0	0	0	0	Min Dihedral Angle (Non-0 Yield)
1.17599	0.0146855	#DIV/0!	1.01209	0.0102557	#DIV/0!	0.00251994	#DIV/0!	0.92402	4.10226	#DIV/0!	#DIV/0!	#DIV/0!	#DIV/0!	0.0107883	0.128384	0.0745146	Avarage ΔGrot (Non-0 Yield)
1.70057	0.000126127	#NUM!	0.370502	0.00886657	#NUM!	0	#NUM!	0.78578	4.69796	#NUM!	#NUM!	#NUM!	#NUM!	0.0107883	0.0001004	0.016886	Median ΔGrot (Non-0 Yield)
1.98484	0.0247864	#DIV/0!	1.70821	0.0173096	#DIV/0!	0.00425316	#DIV/0!	1.55957	6.92382	#DIV/0!	#DIV/0!	#DIV/0!	#DIV/0!	0.0182086	0.216687	0.125766	Avarage ΔGrot/RT (Non-0 Yield)
2.87023	0.000212879	#NUM!	0.625335	0.0149651	#NUM!	0	#NUM!	1.32624	7.92925	#NUM!	#NUM!	#NUM!	#NUM!	0.0182086	0.000169456	0.0285003	Median ΔGrot/RT (Non-0 Yield)
34.02	2.07189	#DIV/0!	22.9952	1.63333	#DIV/0!	1.36667	#DIV/0!	29.8875	47.8333	#DIV/0!	#DIV/0!	#DIV/0!	#DIV/0!	8.65	5.46667	11.9333	Avarage Dihedral Angle (Non-0 Yield)
44.3	0.55	#NUM!	25.9	1.9	#NUM!	0	#NUM!	28.2	54.5	#NUM!	#NUM!	#NUM!	#NUM!	8.65	1.1	4.6	Median Dihedral Angle (Non-0 Yield)

## Sheet: Auxiliary Tables
DG dE	AmideNR	AmideNH	Imide	Py	UreaNH	UreaNR	CarbamideNH	CarbamideNR	BenzamideNH	BenzamideNR	GuanidineNH	GuanidineNR	TioamideNR	Het	Azo	Imine	Ketone	DG Dihedral Angle	AmideNR	AmideNH	Imide	Py	UreaNH	UreaNR	CarbamideNH	CarbamideNR	BenzamideNH	BenzamideNR	GuanidineNH	GuanidineNR	TioamideNR	Het	Azo	Imine	Ketone	DG Yields	AmideNR	AmideNH	Imide	Py	UreaNH	UreaNR	CarbamideNH	CarbamideNR	BenzamideNH	BenzamideNR	GuanidineNH	GuanidineNR	TioamideNR
	1.81353	#N/A	#N/A	#N/A	#N/A	#N/A	#N/A	#N/A	#N/A	#N/A	#N/A	#N/A	#N/A	#N/A	#N/A	#N/A	#N/A		44.3	#N/A	#N/A	#N/A	#N/A	#N/A	#N/A	#N/A	#N/A	#N/A	#N/A	#N/A	#N/A	#N/A	#N/A	#N/A	#N/A		75	#N/A	#N/A	#N/A	#N/A	#N/A	#N/A	#N/A	#N/A	#N/A	#N/A	#N/A	#N/A
	12.2859	#N/A	#N/A	#N/A	#N/A	#N/A	#N/A	#N/A	#N/A	#N/A	#N/A	#N/A	#N/A	#N/A	#N/A	#N/A	#N/A		109.1	#N/A	#N/A	#N/A	#N/A	#N/A	#N/A	#N/A	#N/A	#N/A	#N/A	#N/A	#N/A	#N/A	#N/A	#N/A	#N/A		0	#N/A	#N/A	#N/A	#N/A	#N/A	#N/A	#N/A	#N/A	#N/A	#N/A	#N/A	#N/A
	2.43967	#N/A	#N/A	#N/A	#N/A	#N/A	#N/A	#N/A	#N/A	#N/A	#N/A	#N/A	#N/A	#N/A	#N/A	#N/A	#N/A		52.1	#N/A	#N/A	#N/A	#N/A	#N/A	#N/A	#N/A	#N/A	#N/A	#N/A	#N/A	#N/A	#N/A	#N/A	#N/A	#N/A		0	#N/A	#N/A	#N/A	#N/A	#N/A	#N/A	#N/A	#N/A	#N/A	#N/A	#N/A	#N/A
	#N/A	#N/A	19.3964	#N/A	#N/A	#N/A	#N/A	#N/A	#N/A	#N/A	#N/A	#N/A	#N/A	#N/A	#N/A	#N/A	#N/A		#N/A	#N/A	70.3	#N/A	#N/A	#N/A	#N/A	#N/A	#N/A	#N/A	#N/A	#N/A	#N/A	#N/A	#N/A	#N/A	#N/A		#N/A	#N/A	0	#N/A	#N/A	#N/A	#N/A	#N/A	#N/A	#N/A	#N/A	#N/A	#N/A
	#N/A	#N/A	14.1359	#N/A	#N/A	#N/A	#N/A	#N/A	#N/A	#N/A	#N/A	#N/A	#N/A	#N/A	#N/A	#N/A	#N/A		#N/A	#N/A	55.5	#N/A	#N/A	#N/A	#N/A	#N/A	#N/A	#N/A	#N/A	#N/A	#N/A	#N/A	#N/A	#N/A	#N/A		#N/A	#N/A	0	#N/A	#N/A	#N/A	#N/A	#N/A	#N/A	#N/A	#N/A	#N/A	#N/A
	#N/A	#N/A	3.07032	#N/A	#N/A	#N/A	#N/A	#N/A	#N/A	#N/A	#N/A	#N/A	#N/A	#N/A	#N/A	#N/A	#N/A		#N/A	#N/A	50.1	#N/A	#N/A	#N/A	#N/A	#N/A	#N/A	#N/A	#N/A	#N/A	#N/A	#N/A	#N/A	#N/A	#N/A		#N/A	#N/A	#N/A	#N/A	#N/A	#N/A	#N/A	#N/A	#N/A	#N/A	#N/A	#N/A	#N/A
	#N/A	0.242417	#N/A	#N/A	#N/A	#N/A	#N/A	#N/A	#N/A	#N/A	#N/A	#N/A	#N/A	#N/A	#N/A	#N/A	#N/A		#N/A	32.4	#N/A	#N/A	#N/A	#N/A	#N/A	#N/A	#N/A	#N/A	#N/A	#N/A	#N/A	#N/A	#N/A	#N/A	#N/A		#N/A	#N/A	#N/A	#N/A	#N/A	#N/A	#N/A	#N/A	#N/A	#N/A	#N/A	#N/A	#N/A
	#N/A	#N/A	#N/A	0.440319	#N/A	#N/A	#N/A	#N/A	#N/A	#N/A	#N/A	#N/A	#N/A	#N/A	#N/A	#N/A	#N/A		#N/A	#N/A	#N/A	27.4	#N/A	#N/A	#N/A	#N/A	#N/A	#N/A	#N/A	#N/A	#N/A	#N/A	#N/A	#N/A	#N/A		#N/A	#N/A	#N/A	99	#N/A	#N/A	#N/A	#N/A	#N/A	#N/A	#N/A	#N/A	#N/A
	#N/A	#N/A	#N/A	#N/A	#N/A	#N/A	#N/A	#N/A	#N/A	#N/A	#N/A	#N/A	#N/A	#N/A	#N/A	0	#N/A		#N/A	#N/A	#N/A	#N/A	#N/A	#N/A	#N/A	#N/A	#N/A	#N/A	#N/A	#N/A	#N/A	#N/A	#N/A	0	#N/A		#N/A	#N/A	#N/A	#N/A	#N/A	#N/A	#N/A	#N/A	#N/A	#N/A	#N/A	#N/A	#N/A
	#N/A	#N/A	#N/A	#N/A	#N/A	#N/A	#N/A	#N/A	#N/A	#N/A	#N/A	#N/A	#N/A	#N/A	#N/A	0.00354349	#N/A		#N/A	#N/A	#N/A	#N/A	#N/A	#N/A	#N/A	#N/A	#N/A	#N/A	#N/A	#N/A	#N/A	#N/A	#N/A	1.2	#N/A		#N/A	#N/A	#N/A	#N/A	#N/A	#N/A	#N/A	#N/A	#N/A	#N/A	#N/A	#N/A	#N/A
	#N/A	#N/A	#N/A	#N/A	#N/A	#N/A	#N/A	#N/A	#N/A	#N/A	#N/A	#N/A	#N/A	#N/A	#N/A	0.622496	#N/A		#N/A	#N/A	#N/A	#N/A	#N/A	#N/A	#N/A	#N/A	#N/A	#N/A	#N/A	#N/A	#N/A	#N/A	#N/A	21.8	#N/A		#N/A	#N/A	#N/A	#N/A	#N/A	#N/A	#N/A	#N/A	#N/A	#N/A	#N/A	#N/A	#N/A
	#N/A	-2.50997e-06	#N/A	#N/A	#N/A	#N/A	#N/A	#N/A	#N/A	#N/A	#N/A	#N/A	#N/A	#N/A	#N/A	#N/A	#N/A		#N/A	0.332	#N/A	#N/A	#N/A	#N/A	#N/A	#N/A	#N/A	#N/A	#N/A	#N/A	#N/A	#N/A	#N/A	#N/A	#N/A		#N/A	68	#N/A	#N/A	#N/A	#N/A	#N/A	#N/A	#N/A	#N/A	#N/A	#N/A	#N/A
	#N/A	0	#N/A	#N/A	#N/A	#N/A	#N/A	#N/A	#N/A	#N/A	#N/A	#N/A	#N/A	#N/A	#N/A	#N/A	#N/A		#N/A	0	#N/A	#N/A	#N/A	#N/A	#N/A	#N/A	#N/A	#N/A	#N/A	#N/A	#N/A	#N/A	#N/A	#N/A	#N/A		#N/A	99	#N/A	#N/A	#N/A	#N/A	#N/A	#N/A	#N/A	#N/A	#N/A	#N/A	#N/A
	#N/A	0	#N/A	#N/A	#N/A	#N/A	#N/A	#N/A	#N/A	#N/A	#N/A	#N/A	#N/A	#N/A	#N/A	#N/A	#N/A		#N/A	0	#N/A	#N/A	#N/A	#N/A	#N/A	#N/A	#N/A	#N/A	#N/A	#N/A	#N/A	#N/A	#N/A	#N/A	#N/A		#N/A	93	#N/A	#N/A	#N/A	#N/A	#N/A	#N/A	#N/A	#N/A	#N/A	#N/A	#N/A
	#N/A	0	#N/A	#N/A	#N/A	#N/A	#N/A	#N/A	#N/A	#N/A	#N/A	#N/A	#N/A	#N/A	#N/A	#N/A	#N/A		#N/A	0.1	#N/A	#N/A	#N/A	#N/A	#N/A	#N/A	#N/A	#N/A	#N/A	#N/A	#N/A	#N/A	#N/A	#N/A	#N/A		#N/A	94	#N/A	#N/A	#N/A	#N/A	#N/A	#N/A	#N/A	#N/A	#N/A	#N/A	#N/A
	#N/A	0	#N/A	#N/A	#N/A	#N/A	#N/A	#N/A	#N/A	#N/A	#N/A	#N/A	#N/A	#N/A	#N/A	#N/A	#N/A		#N/A	0	#N/A	#N/A	#N/A	#N/A	#N/A	#N/A	#N/A	#N/A	#N/A	#N/A	#N/A	#N/A	#N/A	#N/A	#N/A		#N/A	96	#N/A	#N/A	#N/A	#N/A	#N/A	#N/A	#N/A	#N/A	#N/A	#N/A	#N/A
	#N/A	0	#N/A	#N/A	#N/A	#N/A	#N/A	#N/A	#N/A	#N/A	#N/A	#N/A	#N/A	#N/A	#N/A	#N/A	#N/A		#N/A	0	#N/A	#N/A	#N/A	#N/A	#N/A	#N/A	#N/A	#N/A	#N/A	#N/A	#N/A	#N/A	#N/A	#N/A	#N/A		#N/A	#N/A	#N/A	#N/A	#N/A	#N/A	#N/A	#N/A	#N/A	#N/A	#N/A	#N/A	#N/A
	#N/A	0	#N/A	#N/A	#N/A	#N/A	#N/A	#N/A	#N/A	#N/A	#N/A	#N/A	#N/A	#N/A	#N/A	#N/A	#N/A		#N/A	0	#N/A	#N/A	#N/A	#N/A	#N/A	#N/A	#N/A	#N/A	#N/A	#N/A	#N/A	#N/A	#N/A	#N/A	#N/A		#N/A	#N/A	#N/A	#N/A	#N/A	#N/A	#N/A	#N/A	#N/A	#N/A	#N/A	#N/A	#N/A
	#N/A	0	#N/A	#N/A	#N/A	#N/A	#N/A	#N/A	#N/A	#N/A	#N/A	#N/A	#N/A	#N/A	#N/A	#N/A	#N/A		#N/A	0	#N/A	#N/A	#N/A	#N/A	#N/A	#N/A	#N/A	#N/A	#N/A	#N/A	#N/A	#N/A	#N/A	#N/A	#N/A		#N/A	#N/A	#N/A	#N/A	#N/A	#N/A	#N/A	#N/A	#N/A	#N/A	#N/A	#N/A	#N/A
	#N/A	0	#N/A	#N/A	#N/A	#N/A	#N/A	#N/A	#N/A	#N/A	#N/A	#N/A	#N/A	#N/A	#N/A	#N/A	#N/A		#N/A	0	#N/A	#N/A	#N/A	#N/A	#N/A	#N/A	#N/A	#N/A	#N/A	#N/A	#N/A	#N/A	#N/A	#N/A	#N/A		#N/A	#N/A	#N/A	#N/A	#N/A	#N/A	#N/A	#N/A	#N/A	#N/A	#N/A	#N/A	#N/A
	#N/A	0	#N/A	#N/A	#N/A	#N/A	#N/A	#N/A	#N/A	#N/A	#N/A	#N/A	#N/A	#N/A	#N/A	#N/A	#N/A		#N/A	0	#N/A	#N/A	#N/A	#N/A	#N/A	#N/A	#N/A	#N/A	#N/A	#N/A	#N/A	#N/A	#N/A	#N/A	#N/A		#N/A	66	#N/A	#N/A	#N/A	#N/A	#N/A	#N/A	#N/A	#N/A	#N/A	#N/A	#N/A
	#N/A	0	#N/A	#N/A	#N/A	#N/A	#N/A	#N/A	#N/A	#N/A	#N/A	#N/A	#N/A	#N/A	#N/A	#N/A	#N/A		#N/A	0	#N/A	#N/A	#N/A	#N/A	#N/A	#N/A	#N/A	#N/A	#N/A	#N/A	#N/A	#N/A	#N/A	#N/A	#N/A		#N/A	92	#N/A	#N/A	#N/A	#N/A	#N/A	#N/A	#N/A	#N/A	#N/A	#N/A	#N/A
	#N/A	0	#N/A	#N/A	#N/A	#N/A	#N/A	#N/A	#N/A	#N/A	#N/A	#N/A	#N/A	#N/A	#N/A	#N/A	#N/A		#N/A	0	#N/A	#N/A	#N/A	#N/A	#N/A	#N/A	#N/A	#N/A	#N/A	#N/A	#N/A	#N/A	#N/A	#N/A	#N/A		#N/A	76	#N/A	#N/A	#N/A	#N/A	#N/A	#N/A	#N/A	#N/A	#N/A	#N/A	#N/A
	#N/A	0.318309	#N/A	#N/A	#N/A	#N/A	#N/A	#N/A	#N/A	#N/A	#N/A	#N/A	#N/A	#N/A	#N/A	#N/A	#N/A		#N/A	44.9	#N/A	#N/A	#N/A	#N/A	#N/A	#N/A	#N/A	#N/A	#N/A	#N/A	#N/A	#N/A	#N/A	#N/A	#N/A		#N/A	#N/A	#N/A	#N/A	#N/A	#N/A	#N/A	#N/A	#N/A	#N/A	#N/A	#N/A	#N/A
	0.567155	#N/A	#N/A	#N/A	#N/A	#N/A	#N/A	#N/A	#N/A	#N/A	#N/A	#N/A	#N/A	#N/A	#N/A	#N/A	#N/A		23.6	#N/A	#N/A	#N/A	#N/A	#N/A	#N/A	#N/A	#N/A	#N/A	#N/A	#N/A	#N/A	#N/A	#N/A	#N/A	#N/A		87	#N/A	#N/A	#N/A	#N/A	#N/A	#N/A	#N/A	#N/A	#N/A	#N/A	#N/A	#N/A
	0.0316266	#N/A	#N/A	#N/A	#N/A	#N/A	#N/A	#N/A	#N/A	#N/A	#N/A	#N/A	#N/A	#N/A	#N/A	#N/A	#N/A		3.4	#N/A	#N/A	#N/A	#N/A	#N/A	#N/A	#N/A	#N/A	#N/A	#N/A	#N/A	#N/A	#N/A	#N/A	#N/A	#N/A		#N/A	#N/A	#N/A	#N/A	#N/A	#N/A	#N/A	#N/A	#N/A	#N/A	#N/A	#N/A	#N/A
	5.14291	#N/A	#N/A	#N/A	#N/A	#N/A	#N/A	#N/A	#N/A	#N/A	#N/A	#N/A	#N/A	#N/A	#N/A	#N/A	#N/A		65.7	#N/A	#N/A	#N/A	#N/A	#N/A	#N/A	#N/A	#N/A	#N/A	#N/A	#N/A	#N/A	#N/A	#N/A	#N/A	#N/A		#N/A	#N/A	#N/A	#N/A	#N/A	#N/A	#N/A	#N/A	#N/A	#N/A	#N/A	#N/A	#N/A
	#N/A	#N/A	#N/A	#N/A	0.029249	#N/A	#N/A	#N/A	#N/A	#N/A	#N/A	#N/A	#N/A	#N/A	#N/A	#N/A	#N/A		#N/A	#N/A	#N/A	#N/A	25.2	#N/A	#N/A	#N/A	#N/A	#N/A	#N/A	#N/A	#N/A	#N/A	#N/A	#N/A	#N/A		#N/A	#N/A	#N/A	#N/A	#N/A	#N/A	#N/A	#N/A	#N/A	#N/A	#N/A	#N/A	#N/A
	#N/A	#N/A	#N/A	#N/A	0.0414351	#N/A	#N/A	#N/A	#N/A	#N/A	#N/A	#N/A	#N/A	#N/A	#N/A	#N/A	#N/A		#N/A	#N/A	#N/A	#N/A	7.7	#N/A	#N/A	#N/A	#N/A	#N/A	#N/A	#N/A	#N/A	#N/A	#N/A	#N/A	#N/A		#N/A	#N/A	#N/A	#N/A	#N/A	#N/A	#N/A	#N/A	#N/A	#N/A	#N/A	#N/A	#N/A
	#N/A	#N/A	#N/A	#N/A	#N/A	#N/A	#N/A	#N/A	0.510301	#N/A	#N/A	#N/A	#N/A	#N/A	#N/A	#N/A	#N/A		#N/A	#N/A	#N/A	#N/A	#N/A	#N/A	#N/A	#N/A	24.1	#N/A	#N/A	#N/A	#N/A	#N/A	#N/A	#N/A	#N/A		#N/A	#N/A	#N/A	#N/A	#N/A	#N/A	#N/A	#N/A	#N/A	#N/A	#N/A	#N/A	#N/A
	#N/A	#N/A	#N/A	#N/A	#N/A	#N/A	#N/A	#N/A	1.67421	#N/A	#N/A	#N/A	#N/A	#N/A	#N/A	#N/A	#N/A		#N/A	#N/A	#N/A	#N/A	#N/A	#N/A	#N/A	#N/A	43.3	#N/A	#N/A	#N/A	#N/A	#N/A	#N/A	#N/A	#N/A		#N/A	#N/A	#N/A	#N/A	#N/A	#N/A	#N/A	#N/A	#N/A	#N/A	#N/A	#N/A	#N/A
	#N/A	#N/A	#N/A	#N/A	#N/A	#N/A	#N/A	#N/A	0.765138	#N/A	#N/A	#N/A	#N/A	#N/A	#N/A	#N/A	#N/A		#N/A	#N/A	#N/A	#N/A	#N/A	#N/A	#N/A	#N/A	31.1	#N/A	#N/A	#N/A	#N/A	#N/A	#N/A	#N/A	#N/A		#N/A	#N/A	#N/A	#N/A	#N/A	#N/A	#N/A	#N/A	96	#N/A	#N/A	#N/A	#N/A
	#N/A	#N/A	#N/A	#N/A	#N/A	#N/A	#N/A	#N/A	2.00355	#N/A	#N/A	#N/A	#N/A	#N/A	#N/A	#N/A	#N/A		#N/A	#N/A	#N/A	#N/A	#N/A	#N/A	#N/A	#N/A	38.2	#N/A	#N/A	#N/A	#N/A	#N/A	#N/A	#N/A	#N/A		#N/A	#N/A	#N/A	#N/A	#N/A	#N/A	#N/A	#N/A	#N/A	#N/A	#N/A	#N/A	#N/A
	#N/A	#N/A	#N/A	#N/A	#N/A	#N/A	#N/A	#N/A	8.73238	#N/A	#N/A	#N/A	#N/A	#N/A	#N/A	#N/A	#N/A		#N/A	#N/A	#N/A	#N/A	#N/A	#N/A	#N/A	#N/A	67.2	#N/A	#N/A	#N/A	#N/A	#N/A	#N/A	#N/A	#N/A		#N/A	#N/A	#N/A	#N/A	#N/A	#N/A	#N/A	#N/A	#N/A	#N/A	#N/A	#N/A	#N/A
	#N/A	#N/A	#N/A	#N/A	#N/A	#N/A	#N/A	#N/A	#N/A	#N/A	#N/A	#N/A	#N/A	0.339764	#N/A	#N/A	#N/A		#N/A	#N/A	#N/A	#N/A	#N/A	#N/A	#N/A	#N/A	#N/A	#N/A	#N/A	#N/A	#N/A	26.8	#N/A	#N/A	#N/A		#N/A	#N/A	#N/A	#N/A	#N/A	#N/A	#N/A	#N/A	#N/A	#N/A	#N/A	#N/A	#N/A
	#N/A	#N/A	#N/A	#N/A	#N/A	#N/A	#N/A	#N/A	#N/A	#N/A	#N/A	#N/A	#N/A	3.56517	#N/A	#N/A	#N/A		#N/A	#N/A	#N/A	#N/A	#N/A	#N/A	#N/A	#N/A	#N/A	#N/A	#N/A	#N/A	#N/A	51.5	#N/A	#N/A	#N/A		#N/A	#N/A	#N/A	#N/A	#N/A	#N/A	#N/A	#N/A	#N/A	#N/A	#N/A	#N/A	#N/A
	#N/A	#N/A	#N/A	#N/A	#N/A	#N/A	#N/A	#N/A	#N/A	#N/A	#N/A	#N/A	#N/A	0.0318048	#N/A	#N/A	#N/A		#N/A	#N/A	#N/A	#N/A	#N/A	#N/A	#N/A	#N/A	#N/A	#N/A	#N/A	#N/A	#N/A	14.2	#N/A	#N/A	#N/A		#N/A	#N/A	#N/A	#N/A	#N/A	#N/A	#N/A	#N/A	#N/A	#N/A	#N/A	#N/A	#N/A
	#N/A	#N/A	#N/A	#N/A	#N/A	#N/A	#N/A	#N/A	#N/A	#N/A	#N/A	#N/A	#N/A	1.22429	#N/A	#N/A	#N/A		#N/A	#N/A	#N/A	#N/A	#N/A	#N/A	#N/A	#N/A	#N/A	#N/A	#N/A	#N/A	#N/A	38.6	#N/A	#N/A	#N/A		#N/A	#N/A	#N/A	#N/A	#N/A	#N/A	#N/A	#N/A	#N/A	#N/A	#N/A	#N/A	#N/A
	#N/A	#N/A	#N/A	#N/A	#N/A	#N/A	#N/A	#N/A	#N/A	#N/A	#N/A	#N/A	#N/A	#N/A	#N/A	0	#N/A		#N/A	#N/A	#N/A	#N/A	#N/A	#N/A	#N/A	#N/A	#N/A	#N/A	#N/A	#N/A	#N/A	#N/A	#N/A	0.1	#N/A		#N/A	#N/A	#N/A	#N/A	#N/A	#N/A	#N/A	#N/A	#N/A	#N/A	#N/A	#N/A	#N/A
	#N/A	#N/A	#N/A	#N/A	#N/A	#N/A	#N/A	#N/A	#N/A	#N/A	#N/A	#N/A	#N/A	#N/A	#N/A	0	#N/A		#N/A	#N/A	#N/A	#N/A	#N/A	#N/A	#N/A	#N/A	#N/A	#N/A	#N/A	#N/A	#N/A	#N/A	#N/A	0.1	#N/A		#N/A	#N/A	#N/A	#N/A	#N/A	#N/A	#N/A	#N/A	#N/A	#N/A	#N/A	#N/A	#N/A
	#N/A	#N/A	#N/A	0	#N/A	#N/A	#N/A	#N/A	#N/A	#N/A	#N/A	#N/A	#N/A	#N/A	#N/A	#N/A	#N/A		#N/A	#N/A	#N/A	0	#N/A	#N/A	#N/A	#N/A	#N/A	#N/A	#N/A	#N/A	#N/A	#N/A	#N/A	#N/A	#N/A		#N/A	#N/A	#N/A	88	#N/A	#N/A	#N/A	#N/A	#N/A	#N/A	#N/A	#N/A	#N/A
	#N/A	#N/A	#N/A	0	#N/A	#N/A	#N/A	#N/A	#N/A	#N/A	#N/A	#N/A	#N/A	#N/A	#N/A	#N/A	#N/A		#N/A	#N/A	#N/A	0	#N/A	#N/A	#N/A	#N/A	#N/A	#N/A	#N/A	#N/A	#N/A	#N/A	#N/A	#N/A	#N/A		#N/A	#N/A	#N/A	90	#N/A	#N/A	#N/A	#N/A	#N/A	#N/A	#N/A	#N/A	#N/A
	#N/A	#N/A	#N/A	0.68618	#N/A	#N/A	#N/A	#N/A	#N/A	#N/A	#N/A	#N/A	#N/A	#N/A	#N/A	#N/A	#N/A		#N/A	#N/A	#N/A	32.5	#N/A	#N/A	#N/A	#N/A	#N/A	#N/A	#N/A	#N/A	#N/A	#N/A	#N/A	#N/A	#N/A		#N/A	#N/A	#N/A	#N/A	#N/A	#N/A	#N/A	#N/A	#N/A	#N/A	#N/A	#N/A	#N/A
	#N/A	#N/A	#N/A	5.8774	#N/A	#N/A	#N/A	#N/A	#N/A	#N/A	#N/A	#N/A	#N/A	#N/A	#N/A	#N/A	#N/A		#N/A	#N/A	#N/A	65.8	#N/A	#N/A	#N/A	#N/A	#N/A	#N/A	#N/A	#N/A	#N/A	#N/A	#N/A	#N/A	#N/A		#N/A	#N/A	#N/A	#N/A	#N/A	#N/A	#N/A	#N/A	#N/A	#N/A	#N/A	#N/A	#N/A
	#N/A	#N/A	#N/A	#N/A	#N/A	#N/A	#N/A	#N/A	#N/A	#N/A	#N/A	#N/A	#N/A	#N/A	0	#N/A	#N/A		#N/A	#N/A	#N/A	#N/A	#N/A	#N/A	#N/A	#N/A	#N/A	#N/A	#N/A	#N/A	#N/A	#N/A	0	#N/A	#N/A		#N/A	#N/A	#N/A	#N/A	#N/A	#N/A	#N/A	#N/A	#N/A	#N/A	#N/A	#N/A	#N/A
	#N/A	#N/A	#N/A	3.7013	#N/A	#N/A	#N/A	#N/A	#N/A	#N/A	#N/A	#N/A	#N/A	#N/A	#N/A	#N/A	#N/A		#N/A	#N/A	#N/A	46.8	#N/A	#N/A	#N/A	#N/A	#N/A	#N/A	#N/A	#N/A	#N/A	#N/A	#N/A	#N/A	#N/A		#N/A	#N/A	#N/A	66	#N/A	#N/A	#N/A	#N/A	#N/A	#N/A	#N/A	#N/A	#N/A
	#N/A	#N/A	#N/A	15.5041	#N/A	#N/A	#N/A	#N/A	#N/A	#N/A	#N/A	#N/A	#N/A	#N/A	#N/A	#N/A	#N/A		#N/A	#N/A	#N/A	93.5	#N/A	#N/A	#N/A	#N/A	#N/A	#N/A	#N/A	#N/A	#N/A	#N/A	#N/A	#N/A	#N/A		#N/A	#N/A	#N/A	#N/A	#N/A	#N/A	#N/A	#N/A	#N/A	#N/A	#N/A	#N/A	#N/A
	3.29493	#N/A	#N/A	#N/A	#N/A	#N/A	#N/A	#N/A	#N/A	#N/A	#N/A	#N/A	#N/A	#N/A	#N/A	#N/A	#N/A		56.3	#N/A	#N/A	#N/A	#N/A	#N/A	#N/A	#N/A	#N/A	#N/A	#N/A	#N/A	#N/A	#N/A	#N/A	#N/A	#N/A		#N/A	#N/A	#N/A	#N/A	#N/A	#N/A	#N/A	#N/A	#N/A	#N/A	#N/A	#N/A	#N/A
	4.04885	#N/A	#N/A	#N/A	#N/A	#N/A	#N/A	#N/A	#N/A	#N/A	#N/A	#N/A	#N/A	#N/A	#N/A	#N/A	#N/A		60.9	#N/A	#N/A	#N/A	#N/A	#N/A	#N/A	#N/A	#N/A	#N/A	#N/A	#N/A	#N/A	#N/A	#N/A	#N/A	#N/A		#N/A	#N/A	#N/A	#N/A	#N/A	#N/A	#N/A	#N/A	#N/A	#N/A	#N/A	#N/A	#N/A
	#N/A	#N/A	3.51549	#N/A	#N/A	#N/A	#N/A	#N/A	#N/A	#N/A	#N/A	#N/A	#N/A	#N/A	#N/A	#N/A	#N/A		#N/A	#N/A	52.6	#N/A	#N/A	#N/A	#N/A	#N/A	#N/A	#N/A	#N/A	#N/A	#N/A	#N/A	#N/A	#N/A	#N/A		#N/A	#N/A	#N/A	#N/A	#N/A	#N/A	#N/A	#N/A	#N/A	#N/A	#N/A	#N/A	#N/A
	#N/A	#N/A	16.3137	#N/A	#N/A	#N/A	#N/A	#N/A	#N/A	#N/A	#N/A	#N/A	#N/A	#N/A	#N/A	#N/A	#N/A		#N/A	#N/A	72.6	#N/A	#N/A	#N/A	#N/A	#N/A	#N/A	#N/A	#N/A	#N/A	#N/A	#N/A	#N/A	#N/A	#N/A		#N/A	#N/A	#N/A	#N/A	#N/A	#N/A	#N/A	#N/A	#N/A	#N/A	#N/A	#N/A	#N/A
	#N/A	#N/A	9.91634	#N/A	#N/A	#N/A	#N/A	#N/A	#N/A	#N/A	#N/A	#N/A	#N/A	#N/A	#N/A	#N/A	#N/A		#N/A	#N/A	89.3	#N/A	#N/A	#N/A	#N/A	#N/A	#N/A	#N/A	#N/A	#N/A	#N/A	#N/A	#N/A	#N/A	#N/A		#N/A	#N/A	#N/A	#N/A	#N/A	#N/A	#N/A	#N/A	#N/A	#N/A	#N/A	#N/A	#N/A
	#N/A	#N/A	14.6977	#N/A	#N/A	#N/A	#N/A	#N/A	#N/A	#N/A	#N/A	#N/A	#N/A	#N/A	#N/A	#N/A	#N/A		#N/A	#N/A	92	#N/A	#N/A	#N/A	#N/A	#N/A	#N/A	#N/A	#N/A	#N/A	#N/A	#N/A	#N/A	#N/A	#N/A		#N/A	#N/A	#N/A	#N/A	#N/A	#N/A	#N/A	#N/A	#N/A	#N/A	#N/A	#N/A	#N/A
	0.0816698	#N/A	#N/A	#N/A	#N/A	#N/A	#N/A	#N/A	#N/A	#N/A	#N/A	#N/A	#N/A	#N/A	#N/A	#N/A	#N/A		2.4	#N/A	#N/A	#N/A	#N/A	#N/A	#N/A	#N/A	#N/A	#N/A	#N/A	#N/A	#N/A	#N/A	#N/A	#N/A	#N/A		76	#N/A	#N/A	#N/A	#N/A	#N/A	#N/A	#N/A	#N/A	#N/A	#N/A	#N/A	#N/A
	22.2576	#N/A	#N/A	#N/A	#N/A	#N/A	#N/A	#N/A	#N/A	#N/A	#N/A	#N/A	#N/A	#N/A	#N/A	#N/A	#N/A		114.4	#N/A	#N/A	#N/A	#N/A	#N/A	#N/A	#N/A	#N/A	#N/A	#N/A	#N/A	#N/A	#N/A	#N/A	#N/A	#N/A		#N/A	#N/A	#N/A	#N/A	#N/A	#N/A	#N/A	#N/A	#N/A	#N/A	#N/A	#N/A	#N/A
	#N/A	#N/A	#N/A	#N/A	#N/A	#N/A	#N/A	#N/A	#N/A	#N/A	#N/A	#N/A	#N/A	#N/A	#N/A	0.0038221	#N/A		#N/A	#N/A	#N/A	#N/A	#N/A	#N/A	#N/A	#N/A	#N/A	#N/A	#N/A	#N/A	#N/A	#N/A	#N/A	2.8	#N/A		#N/A	#N/A	#N/A	#N/A	#N/A	#N/A	#N/A	#N/A	#N/A	#N/A	#N/A	#N/A	#N/A
	#N/A	#N/A	#N/A	#N/A	#N/A	#N/A	#N/A	#N/A	0.598517	#N/A	#N/A	#N/A	#N/A	#N/A	#N/A	#N/A	#N/A		#N/A	#N/A	#N/A	#N/A	#N/A	#N/A	#N/A	#N/A	27.9	#N/A	#N/A	#N/A	#N/A	#N/A	#N/A	#N/A	#N/A		#N/A	#N/A	#N/A	#N/A	#N/A	#N/A	#N/A	#N/A	#N/A	#N/A	#N/A	#N/A	#N/A
	#N/A	#N/A	#N/A	#N/A	#N/A	#N/A	#N/A	#N/A	0.838089	#N/A	#N/A	#N/A	#N/A	#N/A	#N/A	#N/A	#N/A		#N/A	#N/A	#N/A	#N/A	#N/A	#N/A	#N/A	#N/A	26	#N/A	#N/A	#N/A	#N/A	#N/A	#N/A	#N/A	#N/A		#N/A	#N/A	#N/A	#N/A	#N/A	#N/A	#N/A	#N/A	#N/A	#N/A	#N/A	#N/A	#N/A
	#N/A	#N/A	#N/A	#N/A	#N/A	#N/A	#N/A	#N/A	0.62526	#N/A	#N/A	#N/A	#N/A	#N/A	#N/A	#N/A	#N/A		#N/A	#N/A	#N/A	#N/A	#N/A	#N/A	#N/A	#N/A	26.1	#N/A	#N/A	#N/A	#N/A	#N/A	#N/A	#N/A	#N/A		#N/A	#N/A	#N/A	#N/A	#N/A	#N/A	#N/A	#N/A	#N/A	#N/A	#N/A	#N/A	#N/A
	#N/A	#N/A	#N/A	#N/A	#N/A	#N/A	#N/A	#N/A	#N/A	#N/A	#N/A	#N/A	#N/A	#N/A	#N/A	0	#N/A		#N/A	#N/A	#N/A	#N/A	#N/A	#N/A	#N/A	#N/A	#N/A	#N/A	#N/A	#N/A	#N/A	#N/A	#N/A	0.4	#N/A		#N/A	#N/A	#N/A	#N/A	#N/A	#N/A	#N/A	#N/A	#N/A	#N/A	#N/A	#N/A	#N/A
	#N/A	#N/A	#N/A	#N/A	#N/A	#N/A	#N/A	#N/A	#N/A	#N/A	#N/A	#N/A	#N/A	#N/A	#N/A	0.709665	#N/A		#N/A	#N/A	#N/A	#N/A	#N/A	#N/A	#N/A	#N/A	#N/A	#N/A	#N/A	#N/A	#N/A	#N/A	#N/A	23.7	#N/A		#N/A	#N/A	#N/A	#N/A	#N/A	#N/A	#N/A	#N/A	#N/A	#N/A	#N/A	#N/A	#N/A
	#N/A	#N/A	#N/A	#N/A	#N/A	#N/A	#N/A	#N/A	#N/A	#N/A	#N/A	#N/A	#N/A	#N/A	#N/A	0.271952	#N/A		#N/A	#N/A	#N/A	#N/A	#N/A	#N/A	#N/A	#N/A	#N/A	#N/A	#N/A	#N/A	#N/A	#N/A	#N/A	16.9	#N/A		#N/A	#N/A	#N/A	#N/A	#N/A	#N/A	#N/A	#N/A	#N/A	#N/A	#N/A	#N/A	#N/A
	#N/A	#N/A	#N/A	#N/A	#N/A	#N/A	#N/A	#N/A	#N/A	#N/A	#N/A	#N/A	#N/A	#N/A	#N/A	0.119872	#N/A		#N/A	#N/A	#N/A	#N/A	#N/A	#N/A	#N/A	#N/A	#N/A	#N/A	#N/A	#N/A	#N/A	#N/A	#N/A	0.1	#N/A		#N/A	#N/A	#N/A	#N/A	#N/A	#N/A	#N/A	#N/A	#N/A	#N/A	#N/A	#N/A	#N/A
	#N/A	#N/A	#N/A	#N/A	#N/A	#N/A	#N/A	#N/A	#N/A	#N/A	#N/A	#N/A	#N/A	#N/A	#N/A	1.22448	#N/A		#N/A	#N/A	#N/A	#N/A	#N/A	#N/A	#N/A	#N/A	#N/A	#N/A	#N/A	#N/A	#N/A	#N/A	#N/A	33.8	#N/A		#N/A	#N/A	#N/A	#N/A	#N/A	#N/A	#N/A	#N/A	#N/A	#N/A	#N/A	#N/A	#N/A
	#N/A	#N/A	#N/A	#N/A	#N/A	#N/A	#N/A	#N/A	#N/A	#N/A	0.142103	#N/A	#N/A	#N/A	#N/A	#N/A	#N/A		#N/A	#N/A	#N/A	#N/A	#N/A	#N/A	#N/A	#N/A	#N/A	#N/A	4.6	#N/A	#N/A	#N/A	#N/A	#N/A	#N/A		#N/A	#N/A	#N/A	#N/A	#N/A	#N/A	#N/A	#N/A	#N/A	#N/A	#N/A	#N/A	#N/A
	#N/A	#N/A	#N/A	#N/A	#N/A	#N/A	#N/A	#N/A	#N/A	#N/A	#N/A	3.00789	#N/A	#N/A	#N/A	#N/A	#N/A		#N/A	#N/A	#N/A	#N/A	#N/A	#N/A	#N/A	#N/A	#N/A	#N/A	#N/A	51.1	#N/A	#N/A	#N/A	#N/A	#N/A		#N/A	#N/A	#N/A	#N/A	#N/A	#N/A	#N/A	#N/A	#N/A	#N/A	#N/A	#N/A	#N/A
	#N/A	#N/A	#N/A	#N/A	#N/A	#N/A	#N/A	#N/A	#N/A	#N/A	0.1152	#N/A	#N/A	#N/A	#N/A	#N/A	#N/A		#N/A	#N/A	#N/A	#N/A	#N/A	#N/A	#N/A	#N/A	#N/A	#N/A	2.52	#N/A	#N/A	#N/A	#N/A	#N/A	#N/A		#N/A	#N/A	#N/A	#N/A	#N/A	#N/A	#N/A	#N/A	#N/A	#N/A	#N/A	#N/A	#N/A
	#N/A	#N/A	#N/A	#N/A	#N/A	#N/A	#N/A	#N/A	#N/A	#N/A	#N/A	#N/A	#N/A	#N/A	#N/A	1.40246	#N/A		#N/A	#N/A	#N/A	#N/A	#N/A	#N/A	#N/A	#N/A	#N/A	#N/A	#N/A	#N/A	#N/A	#N/A	#N/A	33.6	#N/A		#N/A	#N/A	#N/A	#N/A	#N/A	#N/A	#N/A	#N/A	#N/A	#N/A	#N/A	#N/A	#N/A
	#N/A	#N/A	#N/A	#N/A	#N/A	#N/A	#N/A	#N/A	#N/A	#N/A	#N/A	#N/A	#N/A	#N/A	#N/A	5.30994	#N/A		#N/A	#N/A	#N/A	#N/A	#N/A	#N/A	#N/A	#N/A	#N/A	#N/A	#N/A	#N/A	#N/A	#N/A	#N/A	68.2	#N/A		#N/A	#N/A	#N/A	#N/A	#N/A	#N/A	#N/A	#N/A	#N/A	#N/A	#N/A	#N/A	#N/A
	#N/A	#N/A	#N/A	#N/A	#N/A	#N/A	#N/A	#N/A	#N/A	#N/A	#N/A	#N/A	#N/A	#N/A	#N/A	#N/A	0		#N/A	#N/A	#N/A	#N/A	#N/A	#N/A	#N/A	#N/A	#N/A	#N/A	#N/A	#N/A	#N/A	#N/A	#N/A	#N/A	0		#N/A	#N/A	#N/A	#N/A	#N/A	#N/A	#N/A	#N/A	#N/A	#N/A	#N/A	#N/A	#N/A
	#N/A	#N/A	#N/A	#N/A	#N/A	#N/A	#N/A	#N/A	#N/A	#N/A	#N/A	#N/A	#N/A	#N/A	#N/A	#N/A	1.757e-05		#N/A	#N/A	#N/A	#N/A	#N/A	#N/A	#N/A	#N/A	#N/A	#N/A	#N/A	#N/A	#N/A	#N/A	#N/A	#N/A	0		#N/A	#N/A	#N/A	#N/A	#N/A	#N/A	#N/A	#N/A	#N/A	#N/A	#N/A	#N/A	#N/A
	#N/A	#N/A	#N/A	#N/A	#N/A	#N/A	#N/A	#N/A	#N/A	#N/A	#N/A	#N/A	#N/A	#N/A	#N/A	#N/A	8.78501e-06		#N/A	#N/A	#N/A	#N/A	#N/A	#N/A	#N/A	#N/A	#N/A	#N/A	#N/A	#N/A	#N/A	#N/A	#N/A	#N/A	0		#N/A	#N/A	#N/A	#N/A	#N/A	#N/A	#N/A	#N/A	#N/A	#N/A	#N/A	#N/A	#N/A
	#N/A	#N/A	#N/A	#N/A	#N/A	#N/A	#N/A	#N/A	#N/A	#N/A	#N/A	#N/A	#N/A	#N/A	#N/A	#N/A	0.122858		#N/A	#N/A	#N/A	#N/A	#N/A	#N/A	#N/A	#N/A	#N/A	#N/A	#N/A	#N/A	#N/A	#N/A	#N/A	#N/A	27.8		#N/A	#N/A	#N/A	#N/A	#N/A	#N/A	#N/A	#N/A	#N/A	#N/A	#N/A	#N/A	#N/A
	#N/A	#N/A	#N/A	#N/A	#N/A	#N/A	#N/A	#N/A	#N/A	#N/A	#N/A	#N/A	#N/A	#N/A	#N/A	#N/A	3.70225e-05		#N/A	#N/A	#N/A	#N/A	#N/A	#N/A	#N/A	#N/A	#N/A	#N/A	#N/A	#N/A	#N/A	#N/A	#N/A	#N/A	0		#N/A	#N/A	#N/A	#N/A	#N/A	#N/A	#N/A	#N/A	#N/A	#N/A	#N/A	#N/A	#N/A
	#N/A	#N/A	#N/A	#N/A	#N/A	#N/A	#N/A	#N/A	#N/A	#N/A	#N/A	#N/A	#N/A	#N/A	#N/A	#N/A	0.00156059		#N/A	#N/A	#N/A	#N/A	#N/A	#N/A	#N/A	#N/A	#N/A	#N/A	#N/A	#N/A	#N/A	#N/A	#N/A	#N/A	10.8		#N/A	#N/A	#N/A	#N/A	#N/A	#N/A	#N/A	#N/A	#N/A	#N/A	#N/A	#N/A	#N/A
	#N/A	#N/A	#N/A	#N/A	#N/A	#N/A	#N/A	#N/A	#N/A	#N/A	#N/A	#N/A	#N/A	#N/A	#N/A	#N/A	0		#N/A	#N/A	#N/A	#N/A	#N/A	#N/A	#N/A	#N/A	#N/A	#N/A	#N/A	#N/A	#N/A	#N/A	#N/A	#N/A	0		#N/A	#N/A	#N/A	#N/A	#N/A	#N/A	#N/A	#N/A	#N/A	#N/A	#N/A	#N/A	#N/A
	#N/A	#N/A	#N/A	#N/A	#N/A	#N/A	#N/A	#N/A	#N/A	#N/A	#N/A	#N/A	#N/A	#N/A	#N/A	#N/A	0.0538627		#N/A	#N/A	#N/A	#N/A	#N/A	#N/A	#N/A	#N/A	#N/A	#N/A	#N/A	#N/A	#N/A	#N/A	#N/A	#N/A	18.8		#N/A	#N/A	#N/A	#N/A	#N/A	#N/A	#N/A	#N/A	#N/A	#N/A	#N/A	#N/A	#N/A
	#N/A	#N/A	#N/A	#N/A	#N/A	#N/A	#N/A	#N/A	#N/A	#N/A	#N/A	#N/A	#N/A	#N/A	#N/A	#N/A	-1.757e-05		#N/A	#N/A	#N/A	#N/A	#N/A	#N/A	#N/A	#N/A	#N/A	#N/A	#N/A	#N/A	#N/A	#N/A	#N/A	#N/A	0		#N/A	#N/A	#N/A	#N/A	#N/A	#N/A	#N/A	#N/A	#N/A	#N/A	#N/A	#N/A	#N/A
	#N/A	#N/A	#N/A	#N/A	#N/A	#N/A	#N/A	#N/A	#N/A	#N/A	#N/A	#N/A	#N/A	#N/A	#N/A	#N/A	0.922813		#N/A	#N/A	#N/A	#N/A	#N/A	#N/A	#N/A	#N/A	#N/A	#N/A	#N/A	#N/A	#N/A	#N/A	#N/A	#N/A	35.1		#N/A	#N/A	#N/A	#N/A	#N/A	#N/A	#N/A	#N/A	#N/A	#N/A	#N/A	#N/A	#N/A
	#N/A	#N/A	#N/A	#N/A	0.0423795	#N/A	#N/A	#N/A	#N/A	#N/A	#N/A	#N/A	#N/A	#N/A	#N/A	#N/A	#N/A		#N/A	#N/A	#N/A	#N/A	7.8	#N/A	#N/A	#N/A	#N/A	#N/A	#N/A	#N/A	#N/A	#N/A	#N/A	#N/A	#N/A		#N/A	#N/A	#N/A	#N/A	#N/A	#N/A	#N/A	#N/A	#N/A	#N/A	#N/A	#N/A	#N/A
	#N/A	#N/A	#N/A	#N/A	#N/A	2.48926	#N/A	#N/A	#N/A	#N/A	#N/A	#N/A	#N/A	#N/A	#N/A	#N/A	#N/A		#N/A	#N/A	#N/A	#N/A	#N/A	55.8	#N/A	#N/A	#N/A	#N/A	#N/A	#N/A	#N/A	#N/A	#N/A	#N/A	#N/A		#N/A	#N/A	#N/A	#N/A	#N/A	#N/A	#N/A	#N/A	#N/A	#N/A	#N/A	#N/A	#N/A
	#N/A	#N/A	#N/A	#N/A	#N/A	10.5978	#N/A	#N/A	#N/A	#N/A	#N/A	#N/A	#N/A	#N/A	#N/A	#N/A	#N/A		#N/A	#N/A	#N/A	#N/A	#N/A	111	#N/A	#N/A	#N/A	#N/A	#N/A	#N/A	#N/A	#N/A	#N/A	#N/A	#N/A		#N/A	#N/A	#N/A	#N/A	#N/A	#N/A	#N/A	#N/A	#N/A	#N/A	#N/A	#N/A	#N/A
	#N/A	#N/A	#N/A	#N/A	0.324033	#N/A	#N/A	#N/A	#N/A	#N/A	#N/A	#N/A	#N/A	#N/A	#N/A	#N/A	#N/A		#N/A	#N/A	#N/A	#N/A	17.6	#N/A	#N/A	#N/A	#N/A	#N/A	#N/A	#N/A	#N/A	#N/A	#N/A	#N/A	#N/A		#N/A	#N/A	#N/A	#N/A	#N/A	#N/A	#N/A	#N/A	#N/A	#N/A	#N/A	#N/A	#N/A
	3.06708	#N/A	#N/A	#N/A	#N/A	#N/A	#N/A	#N/A	#N/A	#N/A	#N/A	#N/A	#N/A	#N/A	#N/A	#N/A	#N/A		43.2	#N/A	#N/A	#N/A	#N/A	#N/A	#N/A	#N/A	#N/A	#N/A	#N/A	#N/A	#N/A	#N/A	#N/A	#N/A	#N/A		#N/A	#N/A	#N/A	#N/A	#N/A	#N/A	#N/A	#N/A	#N/A	#N/A	#N/A	#N/A	#N/A
	2.23086	#N/A	#N/A	#N/A	#N/A	#N/A	#N/A	#N/A	#N/A	#N/A	#N/A	#N/A	#N/A	#N/A	#N/A	#N/A	#N/A		36.6	#N/A	#N/A	#N/A	#N/A	#N/A	#N/A	#N/A	#N/A	#N/A	#N/A	#N/A	#N/A	#N/A	#N/A	#N/A	#N/A		#N/A	#N/A	#N/A	#N/A	#N/A	#N/A	#N/A	#N/A	#N/A	#N/A	#N/A	#N/A	#N/A
	6.27859	#N/A	#N/A	#N/A	#N/A	#N/A	#N/A	#N/A	#N/A	#N/A	#N/A	#N/A	#N/A	#N/A	#N/A	#N/A	#N/A		48.9	#N/A	#N/A	#N/A	#N/A	#N/A	#N/A	#N/A	#N/A	#N/A	#N/A	#N/A	#N/A	#N/A	#N/A	#N/A	#N/A		#N/A	#N/A	#N/A	#N/A	#N/A	#N/A	#N/A	#N/A	#N/A	#N/A	#N/A	#N/A	#N/A
	9.5392	#N/A	#N/A	#N/A	#N/A	#N/A	#N/A	#N/A	#N/A	#N/A	#N/A	#N/A	#N/A	#N/A	#N/A	#N/A	#N/A		142	#N/A	#N/A	#N/A	#N/A	#N/A	#N/A	#N/A	#N/A	#N/A	#N/A	#N/A	#N/A	#N/A	#N/A	#N/A	#N/A		#N/A	#N/A	#N/A	#N/A	#N/A	#N/A	#N/A	#N/A	#N/A	#N/A	#N/A	#N/A	#N/A
	#N/A	#N/A	#N/A	#N/A	#N/A	#N/A	0	#N/A	#N/A	#N/A	#N/A	#N/A	#N/A	#N/A	#N/A	#N/A	#N/A		#N/A	#N/A	#N/A	#N/A	#N/A	#N/A	0	#N/A	#N/A	#N/A	#N/A	#N/A	#N/A	#N/A	#N/A	#N/A	#N/A		#N/A	#N/A	#N/A	#N/A	#N/A	#N/A	#N/A	#N/A	#N/A	#N/A	#N/A	#N/A	#N/A
	#N/A	#N/A	#N/A	#N/A	#N/A	#N/A	0	#N/A	#N/A	#N/A	#N/A	#N/A	#N/A	#N/A	#N/A	#N/A	#N/A		#N/A	#N/A	#N/A	#N/A	#N/A	#N/A	0	#N/A	#N/A	#N/A	#N/A	#N/A	#N/A	#N/A	#N/A	#N/A	#N/A		#N/A	#N/A	#N/A	#N/A	#N/A	#N/A	#N/A	#N/A	#N/A	#N/A	#N/A	#N/A	#N/A
	#N/A	#N/A	#N/A	#N/A	#N/A	#N/A	#N/A	2.009	#N/A	#N/A	#N/A	#N/A	#N/A	#N/A	#N/A	#N/A	#N/A		#N/A	#N/A	#N/A	#N/A	#N/A	#N/A	#N/A	50.1	#N/A	#N/A	#N/A	#N/A	#N/A	#N/A	#N/A	#N/A	#N/A		#N/A	#N/A	#N/A	#N/A	#N/A	#N/A	#N/A	#N/A	#N/A	#N/A	#N/A	#N/A	#N/A
	#N/A	#N/A	#N/A	#N/A	#N/A	#N/A	#N/A	11.9176	#N/A	#N/A	#N/A	#N/A	#N/A	#N/A	#N/A	#N/A	#N/A		#N/A	#N/A	#N/A	#N/A	#N/A	#N/A	#N/A	110	#N/A	#N/A	#N/A	#N/A	#N/A	#N/A	#N/A	#N/A	#N/A		#N/A	#N/A	#N/A	#N/A	#N/A	#N/A	#N/A	#N/A	#N/A	#N/A	#N/A	#N/A	#N/A
	#N/A	#N/A	#N/A	#N/A	#N/A	#N/A	#N/A	#N/A	#N/A	#N/A	#N/A	#N/A	9.21086	#N/A	#N/A	#N/A	#N/A		#N/A	#N/A	#N/A	#N/A	#N/A	#N/A	#N/A	#N/A	#N/A	#N/A	#N/A	#N/A	89.5	#N/A	#N/A	#N/A	#N/A		#N/A	#N/A	#N/A	#N/A	#N/A	#N/A	#N/A	#N/A	#N/A	#N/A	#N/A	#N/A	#N/A
	#N/A	#N/A	#N/A	#N/A	#N/A	#N/A	#N/A	#N/A	#N/A	#N/A	#N/A	#N/A	19.565	#N/A	#N/A	#N/A	#N/A		#N/A	#N/A	#N/A	#N/A	#N/A	#N/A	#N/A	#N/A	#N/A	#N/A	#N/A	#N/A	91.3	#N/A	#N/A	#N/A	#N/A		#N/A	#N/A	#N/A	#N/A	#N/A	#N/A	#N/A	#N/A	#N/A	#N/A	#N/A	#N/A	#N/A
	#N/A	#N/A	#N/A	#N/A	#N/A	#N/A	#N/A	0.370733	#N/A	#N/A	#N/A	#N/A	#N/A	#N/A	#N/A	#N/A	#N/A		#N/A	#N/A	#N/A	#N/A	#N/A	#N/A	#N/A	21.6	#N/A	#N/A	#N/A	#N/A	#N/A	#N/A	#N/A	#N/A	#N/A		#N/A	#N/A	#N/A	#N/A	#N/A	#N/A	#N/A	#N/A	#N/A	#N/A	#N/A	#N/A	#N/A
	#N/A	0	#N/A	#N/A	#N/A	#N/A	#N/A	#N/A	#N/A	#N/A	#N/A	#N/A	#N/A	#N/A	#N/A	#N/A	#N/A		#N/A	0	#N/A	#N/A	#N/A	#N/A	#N/A	#N/A	#N/A	#N/A	#N/A	#N/A	#N/A	#N/A	#N/A	#N/A	#N/A		#N/A	93	#N/A	#N/A	#N/A	#N/A	#N/A	#N/A	#N/A	#N/A	#N/A	#N/A	#N/A
	#N/A	0	#N/A	#N/A	#N/A	#N/A	#N/A	#N/A	#N/A	#N/A	#N/A	#N/A	#N/A	#N/A	#N/A	#N/A	#N/A		#N/A	0	#N/A	#N/A	#N/A	#N/A	#N/A	#N/A	#N/A	#N/A	#N/A	#N/A	#N/A	#N/A	#N/A	#N/A	#N/A		#N/A	68	#N/A	#N/A	#N/A	#N/A	#N/A	#N/A	#N/A	#N/A	#N/A	#N/A	#N/A
	#N/A	0.0477634	#N/A	#N/A	#N/A	#N/A	#N/A	#N/A	#N/A	#N/A	#N/A	#N/A	#N/A	#N/A	#N/A	#N/A	#N/A		#N/A	7.7	#N/A	#N/A	#N/A	#N/A	#N/A	#N/A	#N/A	#N/A	#N/A	#N/A	#N/A	#N/A	#N/A	#N/A	#N/A		#N/A	80	#N/A	#N/A	#N/A	#N/A	#N/A	#N/A	#N/A	#N/A	#N/A	#N/A	#N/A
	#N/A	0.0481506	#N/A	#N/A	#N/A	#N/A	#N/A	#N/A	#N/A	#N/A	#N/A	#N/A	#N/A	#N/A	#N/A	#N/A	#N/A		#N/A	7.8	#N/A	#N/A	#N/A	#N/A	#N/A	#N/A	#N/A	#N/A	#N/A	#N/A	#N/A	#N/A	#N/A	#N/A	#N/A		#N/A	75	#N/A	#N/A	#N/A	#N/A	#N/A	#N/A	#N/A	#N/A	#N/A	#N/A	#N/A
	#N/A	1.757e-05	#N/A	#N/A	#N/A	#N/A	#N/A	#N/A	#N/A	#N/A	#N/A	#N/A	#N/A	#N/A	#N/A	#N/A	#N/A		#N/A	0.2	#N/A	#N/A	#N/A	#N/A	#N/A	#N/A	#N/A	#N/A	#N/A	#N/A	#N/A	#N/A	#N/A	#N/A	#N/A		#N/A	80	#N/A	#N/A	#N/A	#N/A	#N/A	#N/A	#N/A	#N/A	#N/A	#N/A	#N/A
	#N/A	-5.64744e-06	#N/A	#N/A	#N/A	#N/A	#N/A	#N/A	#N/A	#N/A	#N/A	#N/A	#N/A	#N/A	#N/A	#N/A	#N/A		#N/A	0.1	#N/A	#N/A	#N/A	#N/A	#N/A	#N/A	#N/A	#N/A	#N/A	#N/A	#N/A	#N/A	#N/A	#N/A	#N/A		#N/A	89	#N/A	#N/A	#N/A	#N/A	#N/A	#N/A	#N/A	#N/A	#N/A	#N/A	#N/A
	#N/A	0.000171307	#N/A	#N/A	#N/A	#N/A	#N/A	#N/A	#N/A	#N/A	#N/A	#N/A	#N/A	#N/A	#N/A	#N/A	#N/A		#N/A	0.5	#N/A	#N/A	#N/A	#N/A	#N/A	#N/A	#N/A	#N/A	#N/A	#N/A	#N/A	#N/A	#N/A	#N/A	#N/A		#N/A	89	#N/A	#N/A	#N/A	#N/A	#N/A	#N/A	#N/A	#N/A	#N/A	#N/A	#N/A
	#N/A	#N/A	#N/A	#N/A	#N/A	#N/A	#N/A	#N/A	0.744674	#N/A	#N/A	#N/A	#N/A	#N/A	#N/A	#N/A	#N/A		#N/A	#N/A	#N/A	#N/A	#N/A	#N/A	#N/A	#N/A	29.1	#N/A	#N/A	#N/A	#N/A	#N/A	#N/A	#N/A	#N/A		#N/A	#N/A	#N/A	#N/A	#N/A	#N/A	#N/A	#N/A	0	#N/A	#N/A	#N/A	#N/A
	#N/A	0.0222047	#N/A	#N/A	#N/A	#N/A	#N/A	#N/A	#N/A	#N/A	#N/A	#N/A	#N/A	#N/A	#N/A	#N/A	#N/A		#N/A	6.6	#N/A	#N/A	#N/A	#N/A	#N/A	#N/A	#N/A	#N/A	#N/A	#N/A	#N/A	#N/A	#N/A	#N/A	#N/A		#N/A	84	#N/A	#N/A	#N/A	#N/A	#N/A	#N/A	#N/A	#N/A	#N/A	#N/A	#N/A
	#N/A	0	#N/A	#N/A	#N/A	#N/A	#N/A	#N/A	#N/A	#N/A	#N/A	#N/A	#N/A	#N/A	#N/A	#N/A	#N/A		#N/A	0	#N/A	#N/A	#N/A	#N/A	#N/A	#N/A	#N/A	#N/A	#N/A	#N/A	#N/A	#N/A	#N/A	#N/A	#N/A		#N/A	0	#N/A	#N/A	#N/A	#N/A	#N/A	#N/A	#N/A	#N/A	#N/A	#N/A	#N/A
	#N/A	#N/A	#N/A	#N/A	#N/A	#N/A	#N/A	#N/A	0.915051	#N/A	#N/A	#N/A	#N/A	#N/A	#N/A	#N/A	#N/A		#N/A	#N/A	#N/A	#N/A	#N/A	#N/A	#N/A	#N/A	28.5	#N/A	#N/A	#N/A	#N/A	#N/A	#N/A	#N/A	#N/A		#N/A	#N/A	#N/A	#N/A	#N/A	#N/A	#N/A	#N/A	86	#N/A	#N/A	#N/A	#N/A
	#N/A	#N/A	#N/A	#N/A	#N/A	#N/A	#N/A	#N/A	0.871196	#N/A	#N/A	#N/A	#N/A	#N/A	#N/A	#N/A	#N/A		#N/A	#N/A	#N/A	#N/A	#N/A	#N/A	#N/A	#N/A	27.5	#N/A	#N/A	#N/A	#N/A	#N/A	#N/A	#N/A	#N/A		#N/A	#N/A	#N/A	#N/A	#N/A	#N/A	#N/A	#N/A	83	#N/A	#N/A	#N/A	#N/A
	#N/A	#N/A	#N/A	#N/A	#N/A	#N/A	#N/A	#N/A	#N/A	#N/A	#N/A	#N/A	#N/A	#N/A	#N/A	0	#N/A		#N/A	#N/A	#N/A	#N/A	#N/A	#N/A	#N/A	#N/A	#N/A	#N/A	#N/A	#N/A	#N/A	#N/A	#N/A	0	#N/A		#N/A	#N/A	#N/A	#N/A	#N/A	#N/A	#N/A	#N/A	#N/A	#N/A	#N/A	#N/A	#N/A
	#N/A	#N/A	#N/A	#N/A	#N/A	#N/A	#N/A	#N/A	#N/A	#N/A	#N/A	#N/A	#N/A	#N/A	#N/A	0	#N/A		#N/A	#N/A	#N/A	#N/A	#N/A	#N/A	#N/A	#N/A	#N/A	#N/A	#N/A	#N/A	#N/A	#N/A	#N/A	0.2	#N/A		#N/A	#N/A	#N/A	#N/A	#N/A	#N/A	#N/A	#N/A	#N/A	#N/A	#N/A	#N/A	#N/A
	#N/A	#N/A	#N/A	#N/A	#N/A	#N/A	#N/A	#N/A	#N/A	#N/A	#N/A	#N/A	#N/A	#N/A	#N/A	0	#N/A		#N/A	#N/A	#N/A	#N/A	#N/A	#N/A	#N/A	#N/A	#N/A	#N/A	#N/A	#N/A	#N/A	#N/A	#N/A	0.4	#N/A		#N/A	#N/A	#N/A	#N/A	#N/A	#N/A	#N/A	#N/A	#N/A	#N/A	#N/A	#N/A	#N/A
	#N/A	#N/A	#N/A	#N/A	#N/A	#N/A	#N/A	#N/A	#N/A	#N/A	#N/A	#N/A	#N/A	#N/A	#N/A	-0.00176704	#N/A		#N/A	#N/A	#N/A	#N/A	#N/A	#N/A	#N/A	#N/A	#N/A	#N/A	#N/A	#N/A	#N/A	#N/A	#N/A	5.3	#N/A		#N/A	#N/A	#N/A	#N/A	#N/A	#N/A	#N/A	#N/A	#N/A	#N/A	#N/A	#N/A	#N/A
	#N/A	#N/A	#N/A	#N/A	#N/A	#N/A	#N/A	#N/A	#N/A	#N/A	#N/A	#N/A	#N/A	#N/A	#N/A	0	#N/A		#N/A	#N/A	#N/A	#N/A	#N/A	#N/A	#N/A	#N/A	#N/A	#N/A	#N/A	#N/A	#N/A	#N/A	#N/A	0.5	#N/A		#N/A	#N/A	#N/A	#N/A	#N/A	#N/A	#N/A	#N/A	#N/A	#N/A	#N/A	#N/A	#N/A
	#N/A	#N/A	#N/A	#N/A	#N/A	#N/A	#N/A	#N/A	#N/A	#N/A	#N/A	#N/A	#N/A	#N/A	#N/A	0	#N/A		#N/A	#N/A	#N/A	#N/A	#N/A	#N/A	#N/A	#N/A	#N/A	#N/A	#N/A	#N/A	#N/A	#N/A	#N/A	0	#N/A		#N/A	#N/A	#N/A	#N/A	#N/A	#N/A	#N/A	#N/A	#N/A	#N/A	#N/A	#N/A	#N/A
	#N/A	#N/A	#N/A	#N/A	#N/A	#N/A	#N/A	#N/A	#N/A	#N/A	#N/A	#N/A	#N/A	#N/A	#N/A	0	#N/A		#N/A	#N/A	#N/A	#N/A	#N/A	#N/A	#N/A	#N/A	#N/A	#N/A	#N/A	#N/A	#N/A	#N/A	#N/A	0	#N/A		#N/A	#N/A	#N/A	#N/A	#N/A	#N/A	#N/A	#N/A	#N/A	#N/A	#N/A	#N/A	#N/A
	#N/A	#N/A	#N/A	#N/A	#N/A	#N/A	#N/A	#N/A	#N/A	#N/A	#N/A	#N/A	#N/A	#N/A	#N/A	0	#N/A		#N/A	#N/A	#N/A	#N/A	#N/A	#N/A	#N/A	#N/A	#N/A	#N/A	#N/A	#N/A	#N/A	#N/A	#N/A	0.1	#N/A		#N/A	#N/A	#N/A	#N/A	#N/A	#N/A	#N/A	#N/A	#N/A	#N/A	#N/A	#N/A	#N/A
	#N/A	#N/A	#N/A	#N/A	#N/A	#N/A	#N/A	#N/A	#N/A	#N/A	#N/A	#N/A	#N/A	#N/A	#N/A	0	#N/A		#N/A	#N/A	#N/A	#N/A	#N/A	#N/A	#N/A	#N/A	#N/A	#N/A	#N/A	#N/A	#N/A	#N/A	#N/A	0	#N/A		#N/A	#N/A	#N/A	#N/A	#N/A	#N/A	#N/A	#N/A	#N/A	#N/A	#N/A	#N/A	#N/A
	#N/A	#N/A	#N/A	#N/A	#N/A	#N/A	#N/A	#N/A	#N/A	#N/A	#N/A	#N/A	#N/A	#N/A	#N/A	0	#N/A		#N/A	#N/A	#N/A	#N/A	#N/A	#N/A	#N/A	#N/A	#N/A	#N/A	#N/A	#N/A	#N/A	#N/A	#N/A	0	#N/A		#N/A	#N/A	#N/A	#N/A	#N/A	#N/A	#N/A	#N/A	#N/A	#N/A	#N/A	#N/A	#N/A
	#N/A	#N/A	#N/A	#N/A	#N/A	#N/A	#N/A	#N/A	#N/A	#N/A	#N/A	#N/A	#N/A	#N/A	#N/A	0	#N/A		#N/A	#N/A	#N/A	#N/A	#N/A	#N/A	#N/A	#N/A	#N/A	#N/A	#N/A	#N/A	#N/A	#N/A	#N/A	0	#N/A		#N/A	#N/A	#N/A	#N/A	#N/A	#N/A	#N/A	#N/A	#N/A	#N/A	#N/A	#N/A	#N/A
	#N/A	#N/A	#N/A	#N/A	#N/A	#N/A	#N/A	#N/A	#N/A	#N/A	#N/A	#N/A	#N/A	#N/A	#N/A	#N/A	0		#N/A	#N/A	#N/A	#N/A	#N/A	#N/A	#N/A	#N/A	#N/A	#N/A	#N/A	#N/A	#N/A	#N/A	#N/A	#N/A	0.1		#N/A	#N/A	#N/A	#N/A	#N/A	#N/A	#N/A	#N/A	#N/A	#N/A	#N/A	#N/A	#N/A
	#N/A	#N/A	#N/A	#N/A	#N/A	#N/A	#N/A	#N/A	#N/A	#N/A	#N/A	#N/A	#N/A	#N/A	#N/A	#N/A	0		#N/A	#N/A	#N/A	#N/A	#N/A	#N/A	#N/A	#N/A	#N/A	#N/A	#N/A	#N/A	#N/A	#N/A	#N/A	#N/A	0.1		#N/A	#N/A	#N/A	#N/A	#N/A	#N/A	#N/A	#N/A	#N/A	#N/A	#N/A	#N/A	#N/A
	#N/A	3.20025e-05	#N/A	#N/A	#N/A	#N/A	#N/A	#N/A	#N/A	#N/A	#N/A	#N/A	#N/A	#N/A	#N/A	#N/A	#N/A		#N/A	0.3	#N/A	#N/A	#N/A	#N/A	#N/A	#N/A	#N/A	#N/A	#N/A	#N/A	#N/A	#N/A	#N/A	#N/A	#N/A		#N/A	83	#N/A	#N/A	#N/A	#N/A	#N/A	#N/A	#N/A	#N/A	#N/A	#N/A	#N/A
	#N/A	0.00273904	#N/A	#N/A	#N/A	#N/A	#N/A	#N/A	#N/A	#N/A	#N/A	#N/A	#N/A	#N/A	#N/A	#N/A	#N/A		#N/A	1.1	#N/A	#N/A	#N/A	#N/A	#N/A	#N/A	#N/A	#N/A	#N/A	#N/A	#N/A	#N/A	#N/A	#N/A	#N/A		#N/A	74	#N/A	#N/A	#N/A	#N/A	#N/A	#N/A	#N/A	#N/A	#N/A	#N/A	#N/A
	#N/A	0	#N/A	#N/A	#N/A	#N/A	#N/A	#N/A	#N/A	#N/A	#N/A	#N/A	#N/A	#N/A	#N/A	#N/A	#N/A		#N/A	0	#N/A	#N/A	#N/A	#N/A	#N/A	#N/A	#N/A	#N/A	#N/A	#N/A	#N/A	#N/A	#N/A	#N/A	#N/A		#N/A	94	#N/A	#N/A	#N/A	#N/A	#N/A	#N/A	#N/A	#N/A	#N/A	#N/A	#N/A
	#N/A	0	#N/A	#N/A	#N/A	#N/A	#N/A	#N/A	#N/A	#N/A	#N/A	#N/A	#N/A	#N/A	#N/A	#N/A	#N/A		#N/A	0	#N/A	#N/A	#N/A	#N/A	#N/A	#N/A	#N/A	#N/A	#N/A	#N/A	#N/A	#N/A	#N/A	#N/A	#N/A		#N/A	74	#N/A	#N/A	#N/A	#N/A	#N/A	#N/A	#N/A	#N/A	#N/A	#N/A	#N/A
	#N/A	0.000581065	#N/A	#N/A	#N/A	#N/A	#N/A	#N/A	#N/A	#N/A	#N/A	#N/A	#N/A	#N/A	#N/A	#N/A	#N/A		#N/A	0.6	#N/A	#N/A	#N/A	#N/A	#N/A	#N/A	#N/A	#N/A	#N/A	#N/A	#N/A	#N/A	#N/A	#N/A	#N/A		#N/A	63	#N/A	#N/A	#N/A	#N/A	#N/A	#N/A	#N/A	#N/A	#N/A	#N/A	#N/A
	#N/A	8.09475e-05	#N/A	#N/A	#N/A	#N/A	#N/A	#N/A	#N/A	#N/A	#N/A	#N/A	#N/A	#N/A	#N/A	#N/A	#N/A		#N/A	0	#N/A	#N/A	#N/A	#N/A	#N/A	#N/A	#N/A	#N/A	#N/A	#N/A	#N/A	#N/A	#N/A	#N/A	#N/A		#N/A	79	#N/A	#N/A	#N/A	#N/A	#N/A	#N/A	#N/A	#N/A	#N/A	#N/A	#N/A
	#N/A	0.000841477	#N/A	#N/A	#N/A	#N/A	#N/A	#N/A	#N/A	#N/A	#N/A	#N/A	#N/A	#N/A	#N/A	#N/A	#N/A		#N/A	0.8	#N/A	#N/A	#N/A	#N/A	#N/A	#N/A	#N/A	#N/A	#N/A	#N/A	#N/A	#N/A	#N/A	#N/A	#N/A		#N/A	93	#N/A	#N/A	#N/A	#N/A	#N/A	#N/A	#N/A	#N/A	#N/A	#N/A	#N/A
	#N/A	0.105805	#N/A	#N/A	#N/A	#N/A	#N/A	#N/A	#N/A	#N/A	#N/A	#N/A	#N/A	#N/A	#N/A	#N/A	#N/A		#N/A	22.9	#N/A	#N/A	#N/A	#N/A	#N/A	#N/A	#N/A	#N/A	#N/A	#N/A	#N/A	#N/A	#N/A	#N/A	#N/A		#N/A	87	#N/A	#N/A	#N/A	#N/A	#N/A	#N/A	#N/A	#N/A	#N/A	#N/A	#N/A
	#N/A	0	#N/A	#N/A	#N/A	#N/A	#N/A	#N/A	#N/A	#N/A	#N/A	#N/A	#N/A	#N/A	#N/A	#N/A	#N/A		#N/A	0	#N/A	#N/A	#N/A	#N/A	#N/A	#N/A	#N/A	#N/A	#N/A	#N/A	#N/A	#N/A	#N/A	#N/A	#N/A		#N/A	54	#N/A	#N/A	#N/A	#N/A	#N/A	#N/A	#N/A	#N/A	#N/A	#N/A	#N/A
	#N/A	0.00174445	#N/A	#N/A	#N/A	#N/A	#N/A	#N/A	#N/A	#N/A	#N/A	#N/A	#N/A	#N/A	#N/A	#N/A	#N/A		#N/A	0.8	#N/A	#N/A	#N/A	#N/A	#N/A	#N/A	#N/A	#N/A	#N/A	#N/A	#N/A	#N/A	#N/A	#N/A	#N/A		#N/A	95	#N/A	#N/A	#N/A	#N/A	#N/A	#N/A	#N/A	#N/A	#N/A	#N/A	#N/A
	#N/A	0.0257375	#N/A	#N/A	#N/A	#N/A	#N/A	#N/A	#N/A	#N/A	#N/A	#N/A	#N/A	#N/A	#N/A	#N/A	#N/A		#N/A	1.2	#N/A	#N/A	#N/A	#N/A	#N/A	#N/A	#N/A	#N/A	#N/A	#N/A	#N/A	#N/A	#N/A	#N/A	#N/A		#N/A	73	#N/A	#N/A	#N/A	#N/A	#N/A	#N/A	#N/A	#N/A	#N/A	#N/A	#N/A
	#N/A	0.00209585	#N/A	#N/A	#N/A	#N/A	#N/A	#N/A	#N/A	#N/A	#N/A	#N/A	#N/A	#N/A	#N/A	#N/A	#N/A		#N/A	1.3	#N/A	#N/A	#N/A	#N/A	#N/A	#N/A	#N/A	#N/A	#N/A	#N/A	#N/A	#N/A	#N/A	#N/A	#N/A		#N/A	35	#N/A	#N/A	#N/A	#N/A	#N/A	#N/A	#N/A	#N/A	#N/A	#N/A	#N/A
	#N/A	-1.255e-05	#N/A	#N/A	#N/A	#N/A	#N/A	#N/A	#N/A	#N/A	#N/A	#N/A	#N/A	#N/A	#N/A	#N/A	#N/A		#N/A	0.1	#N/A	#N/A	#N/A	#N/A	#N/A	#N/A	#N/A	#N/A	#N/A	#N/A	#N/A	#N/A	#N/A	#N/A	#N/A		#N/A	72	#N/A	#N/A	#N/A	#N/A	#N/A	#N/A	#N/A	#N/A	#N/A	#N/A	#N/A
	#N/A	0	#N/A	#N/A	#N/A	#N/A	#N/A	#N/A	#N/A	#N/A	#N/A	#N/A	#N/A	#N/A	#N/A	#N/A	#N/A		#N/A	1	#N/A	#N/A	#N/A	#N/A	#N/A	#N/A	#N/A	#N/A	#N/A	#N/A	#N/A	#N/A	#N/A	#N/A	#N/A		#N/A	60	#N/A	#N/A	#N/A	#N/A	#N/A	#N/A	#N/A	#N/A	#N/A	#N/A	#N/A
	#N/A	0.000225273	#N/A	#N/A	#N/A	#N/A	#N/A	#N/A	#N/A	#N/A	#N/A	#N/A	#N/A	#N/A	#N/A	#N/A	#N/A		#N/A	0.7	#N/A	#N/A	#N/A	#N/A	#N/A	#N/A	#N/A	#N/A	#N/A	#N/A	#N/A	#N/A	#N/A	#N/A	#N/A		#N/A	85	#N/A	#N/A	#N/A	#N/A	#N/A	#N/A	#N/A	#N/A	#N/A	#N/A	#N/A
	#N/A	#N/A	#N/A	#N/A	0.00886657	#N/A	#N/A	#N/A	#N/A	#N/A	#N/A	#N/A	#N/A	#N/A	#N/A	#N/A	#N/A		#N/A	#N/A	#N/A	#N/A	2	#N/A	#N/A	#N/A	#N/A	#N/A	#N/A	#N/A	#N/A	#N/A	#N/A	#N/A	#N/A		#N/A	#N/A	#N/A	#N/A	90	#N/A	#N/A	#N/A	#N/A	#N/A	#N/A	#N/A	#N/A
	#N/A	#N/A	#N/A	#N/A	0.00345439	#N/A	#N/A	#N/A	#N/A	#N/A	#N/A	#N/A	#N/A	#N/A	#N/A	#N/A	#N/A		#N/A	#N/A	#N/A	#N/A	1	#N/A	#N/A	#N/A	#N/A	#N/A	#N/A	#N/A	#N/A	#N/A	#N/A	#N/A	#N/A		#N/A	#N/A	#N/A	#N/A	79	#N/A	#N/A	#N/A	#N/A	#N/A	#N/A	#N/A	#N/A
	#N/A	#N/A	#N/A	#N/A	#N/A	#N/A	#N/A	#N/A	#N/A	#N/A	#N/A	#N/A	#N/A	#N/A	0.0215766	#N/A	#N/A		#N/A	#N/A	#N/A	#N/A	#N/A	#N/A	#N/A	#N/A	#N/A	#N/A	#N/A	#N/A	#N/A	#N/A	17.3	#N/A	#N/A		#N/A	#N/A	#N/A	#N/A	#N/A	#N/A	#N/A	#N/A	#N/A	#N/A	#N/A	#N/A	#N/A
	#N/A	#N/A	#N/A	#N/A	#N/A	#N/A	#N/A	#N/A	#N/A	#N/A	#N/A	#N/A	#N/A	#N/A	#N/A	0	#N/A		#N/A	#N/A	#N/A	#N/A	#N/A	#N/A	#N/A	#N/A	#N/A	#N/A	#N/A	#N/A	#N/A	#N/A	#N/A	0	#N/A		#N/A	#N/A	#N/A	#N/A	#N/A	#N/A	#N/A	#N/A	#N/A	#N/A	#N/A	#N/A	#N/A
	#N/A	#N/A	#N/A	#N/A	#N/A	#N/A	#N/A	#N/A	#N/A	#N/A	#N/A	#N/A	#N/A	#N/A	#N/A	0.22056	#N/A		#N/A	#N/A	#N/A	#N/A	#N/A	#N/A	#N/A	#N/A	#N/A	#N/A	#N/A	#N/A	#N/A	#N/A	#N/A	16.4	#N/A		#N/A	#N/A	#N/A	#N/A	#N/A	#N/A	#N/A	#N/A	#N/A	#N/A	#N/A	#N/A	#N/A
	#N/A	#N/A	#N/A	#N/A	0.018446	#N/A	#N/A	#N/A	#N/A	#N/A	#N/A	#N/A	#N/A	#N/A	#N/A	#N/A	#N/A		#N/A	#N/A	#N/A	#N/A	1.9	#N/A	#N/A	#N/A	#N/A	#N/A	#N/A	#N/A	#N/A	#N/A	#N/A	#N/A	#N/A		#N/A	#N/A	#N/A	#N/A	87	#N/A	#N/A	#N/A	#N/A	#N/A	#N/A	#N/A	#N/A
	#N/A	#N/A	#N/A	#N/A	#N/A	#N/A	0	#N/A	#N/A	#N/A	#N/A	#N/A	#N/A	#N/A	#N/A	#N/A	#N/A		#N/A	#N/A	#N/A	#N/A	#N/A	#N/A	0	#N/A	#N/A	#N/A	#N/A	#N/A	#N/A	#N/A	#N/A	#N/A	#N/A		#N/A	#N/A	#N/A	#N/A	#N/A	#N/A	75	#N/A	#N/A	#N/A	#N/A	#N/A	#N/A
	#N/A	#N/A	#N/A	#N/A	#N/A	#N/A	0	#N/A	#N/A	#N/A	#N/A	#N/A	#N/A	#N/A	#N/A	#N/A	#N/A		#N/A	#N/A	#N/A	#N/A	#N/A	#N/A	0	#N/A	#N/A	#N/A	#N/A	#N/A	#N/A	#N/A	#N/A	#N/A	#N/A		#N/A	#N/A	#N/A	#N/A	#N/A	#N/A	80	#N/A	#N/A	#N/A	#N/A	#N/A	#N/A
	#N/A	#N/A	#N/A	#N/A	#N/A	#N/A	0.0194481	#N/A	#N/A	#N/A	#N/A	#N/A	#N/A	#N/A	#N/A	#N/A	#N/A		#N/A	#N/A	#N/A	#N/A	#N/A	#N/A	1.1	#N/A	#N/A	#N/A	#N/A	#N/A	#N/A	#N/A	#N/A	#N/A	#N/A		#N/A	#N/A	#N/A	#N/A	#N/A	#N/A	80	#N/A	#N/A	#N/A	#N/A	#N/A	#N/A
	#N/A	#N/A	#N/A	#N/A	#N/A	#N/A	0	#N/A	#N/A	#N/A	#N/A	#N/A	#N/A	#N/A	#N/A	#N/A	#N/A		#N/A	#N/A	#N/A	#N/A	#N/A	#N/A	0	#N/A	#N/A	#N/A	#N/A	#N/A	#N/A	#N/A	#N/A	#N/A	#N/A		#N/A	#N/A	#N/A	#N/A	#N/A	#N/A	90	#N/A	#N/A	#N/A	#N/A	#N/A	#N/A
	#N/A	#N/A	#N/A	#N/A	#N/A	#N/A	0.00297498	#N/A	#N/A	#N/A	#N/A	#N/A	#N/A	#N/A	#N/A	#N/A	#N/A		#N/A	#N/A	#N/A	#N/A	#N/A	#N/A	9.5	#N/A	#N/A	#N/A	#N/A	#N/A	#N/A	#N/A	#N/A	#N/A	#N/A		#N/A	#N/A	#N/A	#N/A	#N/A	#N/A	70	#N/A	#N/A	#N/A	#N/A	#N/A	#N/A
	#N/A	#N/A	#N/A	#N/A	#N/A	#N/A	0.00781049	#N/A	#N/A	#N/A	#N/A	#N/A	#N/A	#N/A	#N/A	#N/A	#N/A		#N/A	#N/A	#N/A	#N/A	#N/A	#N/A	5.6	#N/A	#N/A	#N/A	#N/A	#N/A	#N/A	#N/A	#N/A	#N/A	#N/A		#N/A	#N/A	#N/A	#N/A	#N/A	#N/A	30	#N/A	#N/A	#N/A	#N/A	#N/A	#N/A
	#N/A	#N/A	#N/A	#N/A	#N/A	#N/A	0	#N/A	#N/A	#N/A	#N/A	#N/A	#N/A	#N/A	#N/A	#N/A	#N/A		#N/A	#N/A	#N/A	#N/A	#N/A	#N/A	0	#N/A	#N/A	#N/A	#N/A	#N/A	#N/A	#N/A	#N/A	#N/A	#N/A		#N/A	#N/A	#N/A	#N/A	#N/A	#N/A	65	#N/A	#N/A	#N/A	#N/A	#N/A	#N/A
	#N/A	#N/A	#N/A	#N/A	#N/A	#N/A	-3.76503e-06	#N/A	#N/A	#N/A	#N/A	#N/A	#N/A	#N/A	#N/A	#N/A	#N/A		#N/A	#N/A	#N/A	#N/A	#N/A	#N/A	0	#N/A	#N/A	#N/A	#N/A	#N/A	#N/A	#N/A	#N/A	#N/A	#N/A		#N/A	#N/A	#N/A	#N/A	#N/A	#N/A	75	#N/A	#N/A	#N/A	#N/A	#N/A	#N/A
	#N/A	#N/A	#N/A	#N/A	#N/A	#N/A	9.41247e-06	#N/A	#N/A	#N/A	#N/A	#N/A	#N/A	#N/A	#N/A	#N/A	#N/A		#N/A	#N/A	#N/A	#N/A	#N/A	#N/A	0.2	#N/A	#N/A	#N/A	#N/A	#N/A	#N/A	#N/A	#N/A	#N/A	#N/A		#N/A	#N/A	#N/A	#N/A	#N/A	#N/A	45	#N/A	#N/A	#N/A	#N/A	#N/A	#N/A
	#N/A	#N/A	#N/A	#N/A	#N/A	#N/A	0	#N/A	#N/A	#N/A	#N/A	#N/A	#N/A	#N/A	#N/A	#N/A	#N/A		#N/A	#N/A	#N/A	#N/A	#N/A	#N/A	0	#N/A	#N/A	#N/A	#N/A	#N/A	#N/A	#N/A	#N/A	#N/A	#N/A		#N/A	#N/A	#N/A	#N/A	#N/A	#N/A	72	#N/A	#N/A	#N/A	#N/A	#N/A	#N/A
	#N/A	#N/A	#N/A	#N/A	#N/A	#N/A	0	#N/A	#N/A	#N/A	#N/A	#N/A	#N/A	#N/A	#N/A	#N/A	#N/A		#N/A	#N/A	#N/A	#N/A	#N/A	#N/A	0	#N/A	#N/A	#N/A	#N/A	#N/A	#N/A	#N/A	#N/A	#N/A	#N/A		#N/A	#N/A	#N/A	#N/A	#N/A	#N/A	70	#N/A	#N/A	#N/A	#N/A	#N/A	#N/A
	#N/A	#N/A	#N/A	#N/A	#N/A	#N/A	0	#N/A	#N/A	#N/A	#N/A	#N/A	#N/A	#N/A	#N/A	#N/A	#N/A		#N/A	#N/A	#N/A	#N/A	#N/A	#N/A	0	#N/A	#N/A	#N/A	#N/A	#N/A	#N/A	#N/A	#N/A	#N/A	#N/A		#N/A	#N/A	#N/A	#N/A	#N/A	#N/A	60	#N/A	#N/A	#N/A	#N/A	#N/A	#N/A
	#N/A	#N/A	#N/A	#N/A	#N/A	#N/A	#N/A	#N/A	#N/A	#N/A	#N/A	#N/A	#N/A	#N/A	#N/A	0.00809412	#N/A		#N/A	#N/A	#N/A	#N/A	#N/A	#N/A	#N/A	#N/A	#N/A	#N/A	#N/A	#N/A	#N/A	#N/A	#N/A	3.3	#N/A		#N/A	#N/A	#N/A	#N/A	#N/A	#N/A	#N/A	#N/A	#N/A	#N/A	#N/A	#N/A	#N/A
	#N/A	#N/A	#N/A	#N/A	#N/A	#N/A	#N/A	#N/A	#N/A	#N/A	#N/A	#N/A	#N/A	#N/A	#N/A	0.00227218	#N/A		#N/A	#N/A	#N/A	#N/A	#N/A	#N/A	#N/A	#N/A	#N/A	#N/A	#N/A	#N/A	#N/A	#N/A	#N/A	1.6	#N/A		#N/A	#N/A	#N/A	#N/A	#N/A	#N/A	#N/A	#N/A	#N/A	#N/A	#N/A	#N/A	#N/A
	#N/A	#N/A	#N/A	#N/A	#N/A	#N/A	#N/A	#N/A	#N/A	#N/A	#N/A	#N/A	#N/A	#N/A	#N/A	0.0002008	#N/A		#N/A	#N/A	#N/A	#N/A	#N/A	#N/A	#N/A	#N/A	#N/A	#N/A	#N/A	#N/A	#N/A	#N/A	#N/A	0.4	#N/A		#N/A	#N/A	#N/A	#N/A	#N/A	#N/A	#N/A	#N/A	#N/A	#N/A	#N/A	#N/A	#N/A
	#N/A	#N/A	#N/A	#N/A	#N/A	#N/A	#N/A	#N/A	#N/A	#N/A	#N/A	#N/A	#N/A	#N/A	#N/A	0.00279488	#N/A		#N/A	#N/A	#N/A	#N/A	#N/A	#N/A	#N/A	#N/A	#N/A	#N/A	#N/A	#N/A	#N/A	#N/A	#N/A	1.5	#N/A		#N/A	#N/A	#N/A	#N/A	#N/A	#N/A	#N/A	#N/A	#N/A	#N/A	#N/A	#N/A	#N/A
	#N/A	#N/A	#N/A	3.71981	#N/A	#N/A	#N/A	#N/A	#N/A	#N/A	#N/A	#N/A	#N/A	#N/A	#N/A	#N/A	#N/A		#N/A	#N/A	#N/A	46.9	#N/A	#N/A	#N/A	#N/A	#N/A	#N/A	#N/A	#N/A	#N/A	#N/A	#N/A	#N/A	#N/A		#N/A	#N/A	#N/A	96	#N/A	#N/A	#N/A	#N/A	#N/A	#N/A	#N/A	#N/A	#N/A
	#N/A	#N/A	#N/A	#N/A	#N/A	#N/A	#N/A	#N/A	#N/A	#N/A	#N/A	#N/A	#N/A	#N/A	#N/A	2.61716	#N/A		#N/A	#N/A	#N/A	#N/A	#N/A	#N/A	#N/A	#N/A	#N/A	#N/A	#N/A	#N/A	#N/A	#N/A	#N/A	40.5	#N/A		#N/A	#N/A	#N/A	#N/A	#N/A	#N/A	#N/A	#N/A	#N/A	#N/A	#N/A	#N/A	#N/A
	#N/A	#N/A	#N/A	#N/A	#N/A	#N/A	#N/A	#N/A	#N/A	#N/A	#N/A	#N/A	#N/A	#N/A	#N/A	0.000419798	#N/A		#N/A	#N/A	#N/A	#N/A	#N/A	#N/A	#N/A	#N/A	#N/A	#N/A	#N/A	#N/A	#N/A	#N/A	#N/A	5.4	#N/A		#N/A	#N/A	#N/A	#N/A	#N/A	#N/A	#N/A	#N/A	#N/A	#N/A	#N/A	#N/A	#N/A
	#N/A	#N/A	#N/A	1.05751	#N/A	#N/A	#N/A	#N/A	#N/A	#N/A	#N/A	#N/A	#N/A	#N/A	#N/A	#N/A	#N/A		#N/A	#N/A	#N/A	25.4	#N/A	#N/A	#N/A	#N/A	#N/A	#N/A	#N/A	#N/A	#N/A	#N/A	#N/A	#N/A	#N/A		#N/A	#N/A	#N/A	81	#N/A	#N/A	#N/A	#N/A	#N/A	#N/A	#N/A	#N/A	#N/A
	#N/A	#N/A	#N/A	#N/A	#N/A	#N/A	#N/A	#N/A	#N/A	#N/A	#N/A	#N/A	#N/A	#N/A	#N/A	0.0831312	#N/A		#N/A	#N/A	#N/A	#N/A	#N/A	#N/A	#N/A	#N/A	#N/A	#N/A	#N/A	#N/A	#N/A	#N/A	#N/A	19.6	#N/A		#N/A	#N/A	#N/A	#N/A	#N/A	#N/A	#N/A	#N/A	#N/A	#N/A	#N/A	#N/A	#N/A
	#N/A	#N/A	#N/A	#N/A	#N/A	#N/A	#N/A	#N/A	#N/A	#N/A	#N/A	#N/A	#N/A	#N/A	#N/A	0	#N/A		#N/A	#N/A	#N/A	#N/A	#N/A	#N/A	#N/A	#N/A	#N/A	#N/A	#N/A	#N/A	#N/A	#N/A	#N/A	0	#N/A		#N/A	#N/A	#N/A	#N/A	#N/A	#N/A	#N/A	#N/A	#N/A	#N/A	#N/A	#N/A	#N/A
	#N/A	#N/A	#N/A	#N/A	#N/A	#N/A	#N/A	#N/A	#N/A	#N/A	#N/A	#N/A	#N/A	#N/A	#N/A	0	#N/A		#N/A	#N/A	#N/A	#N/A	#N/A	#N/A	#N/A	#N/A	#N/A	#N/A	#N/A	#N/A	#N/A	#N/A	#N/A	0	#N/A		#N/A	#N/A	#N/A	#N/A	#N/A	#N/A	#N/A	#N/A	#N/A	#N/A	#N/A	#N/A	#N/A
	#N/A	#N/A	#N/A	#N/A	#N/A	#N/A	#N/A	#N/A	#N/A	#N/A	#N/A	#N/A	#N/A	#N/A	#N/A	0	#N/A		#N/A	#N/A	#N/A	#N/A	#N/A	#N/A	#N/A	#N/A	#N/A	#N/A	#N/A	#N/A	#N/A	#N/A	#N/A	0.1	#N/A		#N/A	#N/A	#N/A	#N/A	#N/A	#N/A	#N/A	#N/A	#N/A	#N/A	#N/A	#N/A	#N/A
	#N/A	#N/A	#N/A	#N/A	#N/A	#N/A	#N/A	#N/A	#N/A	#N/A	#N/A	#N/A	#N/A	#N/A	#N/A	0	#N/A		#N/A	#N/A	#N/A	#N/A	#N/A	#N/A	#N/A	#N/A	#N/A	#N/A	#N/A	#N/A	#N/A	#N/A	#N/A	0.1	#N/A		#N/A	#N/A	#N/A	#N/A	#N/A	#N/A	#N/A	#N/A	#N/A	#N/A	#N/A	#N/A	#N/A
	#N/A	#N/A	#N/A	#N/A	#N/A	#N/A	#N/A	#N/A	#N/A	#N/A	#N/A	#N/A	#N/A	#N/A	#N/A	#N/A	0.016886		#N/A	#N/A	#N/A	#N/A	#N/A	#N/A	#N/A	#N/A	#N/A	#N/A	#N/A	#N/A	#N/A	#N/A	#N/A	#N/A	4.6		#N/A	#N/A	#N/A	#N/A	#N/A	#N/A	#N/A	#N/A	#N/A	#N/A	#N/A	#N/A	#N/A
	#N/A	#N/A	#N/A	#N/A	#N/A	#N/A	#N/A	#N/A	#N/A	#N/A	#N/A	#N/A	#N/A	#N/A	#N/A	#N/A	0.189207		#N/A	#N/A	#N/A	#N/A	#N/A	#N/A	#N/A	#N/A	#N/A	#N/A	#N/A	#N/A	#N/A	#N/A	#N/A	#N/A	23.9		#N/A	#N/A	#N/A	#N/A	#N/A	#N/A	#N/A	#N/A	#N/A	#N/A	#N/A	#N/A	#N/A
	#N/A	#N/A	#N/A	#N/A	#N/A	#N/A	#N/A	#N/A	#N/A	#N/A	#N/A	#N/A	#N/A	#N/A	#N/A	#N/A	0.206782		#N/A	#N/A	#N/A	#N/A	#N/A	#N/A	#N/A	#N/A	#N/A	#N/A	#N/A	#N/A	#N/A	#N/A	#N/A	#N/A	27.3		#N/A	#N/A	#N/A	#N/A	#N/A	#N/A	#N/A	#N/A	#N/A	#N/A	#N/A	#N/A	#N/A
	#N/A	#N/A	#N/A	#N/A	#N/A	#N/A	#N/A	#N/A	#N/A	#N/A	#N/A	#N/A	#N/A	#N/A	#N/A	#N/A	0.134916		#N/A	#N/A	#N/A	#N/A	#N/A	#N/A	#N/A	#N/A	#N/A	#N/A	#N/A	#N/A	#N/A	#N/A	#N/A	#N/A	23.6		#N/A	#N/A	#N/A	#N/A	#N/A	#N/A	#N/A	#N/A	#N/A	#N/A	#N/A	#N/A	#N/A
	#N/A	#N/A	#N/A	0	#N/A	#N/A	#N/A	#N/A	#N/A	#N/A	#N/A	#N/A	#N/A	#N/A	#N/A	#N/A	#N/A		#N/A	#N/A	#N/A	0	#N/A	#N/A	#N/A	#N/A	#N/A	#N/A	#N/A	#N/A	#N/A	#N/A	#N/A	#N/A	#N/A		#N/A	#N/A	#N/A	96	#N/A	#N/A	#N/A	#N/A	#N/A	#N/A	#N/A	#N/A	#N/A
	#N/A	#N/A	#N/A	0	#N/A	#N/A	#N/A	#N/A	#N/A	#N/A	#N/A	#N/A	#N/A	#N/A	#N/A	#N/A	#N/A		#N/A	#N/A	#N/A	0	#N/A	#N/A	#N/A	#N/A	#N/A	#N/A	#N/A	#N/A	#N/A	#N/A	#N/A	#N/A	#N/A		#N/A	#N/A	#N/A	92	#N/A	#N/A	#N/A	#N/A	#N/A	#N/A	#N/A	#N/A	#N/A
	#N/A	#N/A	#N/A	0	#N/A	#N/A	#N/A	#N/A	#N/A	#N/A	#N/A	#N/A	#N/A	#N/A	#N/A	#N/A	#N/A		#N/A	#N/A	#N/A	0	#N/A	#N/A	#N/A	#N/A	#N/A	#N/A	#N/A	#N/A	#N/A	#N/A	#N/A	#N/A	#N/A		#N/A	#N/A	#N/A	92	#N/A	#N/A	#N/A	#N/A	#N/A	#N/A	#N/A	#N/A	#N/A
	#N/A	#N/A	#N/A	0	#N/A	#N/A	#N/A	#N/A	#N/A	#N/A	#N/A	#N/A	#N/A	#N/A	#N/A	#N/A	#N/A		#N/A	#N/A	#N/A	0	#N/A	#N/A	#N/A	#N/A	#N/A	#N/A	#N/A	#N/A	#N/A	#N/A	#N/A	#N/A	#N/A		#N/A	#N/A	#N/A	92	#N/A	#N/A	#N/A	#N/A	#N/A	#N/A	#N/A	#N/A	#N/A
	#N/A	#N/A	#N/A	#N/A	#N/A	#N/A	#N/A	#N/A	#N/A	#N/A	#N/A	#N/A	#N/A	#N/A	#N/A	0.00201616	#N/A		#N/A	#N/A	#N/A	#N/A	#N/A	#N/A	#N/A	#N/A	#N/A	#N/A	#N/A	#N/A	#N/A	#N/A	#N/A	1.4	#N/A		#N/A	#N/A	#N/A	#N/A	#N/A	#N/A	#N/A	#N/A	#N/A	#N/A	#N/A	#N/A	#N/A
	#N/A	#N/A	#N/A	#N/A	#N/A	#N/A	#N/A	#N/A	#N/A	#N/A	#N/A	#N/A	#N/A	#N/A	#N/A	0.25852	#N/A		#N/A	#N/A	#N/A	#N/A	#N/A	#N/A	#N/A	#N/A	#N/A	#N/A	#N/A	#N/A	#N/A	#N/A	#N/A	29.6	#N/A		#N/A	#N/A	#N/A	#N/A	#N/A	#N/A	#N/A	#N/A	#N/A	#N/A	#N/A	#N/A	#N/A
	#N/A	#N/A	#N/A	#N/A	#N/A	#N/A	#N/A	#N/A	#N/A	#N/A	#N/A	#N/A	#N/A	#N/A	#N/A	0.815003	#N/A		#N/A	#N/A	#N/A	#N/A	#N/A	#N/A	#N/A	#N/A	#N/A	#N/A	#N/A	#N/A	#N/A	#N/A	#N/A	41.8	#N/A		#N/A	#N/A	#N/A	#N/A	#N/A	#N/A	#N/A	#N/A	#N/A	#N/A	#N/A	#N/A	#N/A
	#N/A	#N/A	#N/A	#N/A	#N/A	#N/A	#N/A	#N/A	#N/A	#N/A	#N/A	#N/A	#N/A	#N/A	#N/A	0.00429147	#N/A		#N/A	#N/A	#N/A	#N/A	#N/A	#N/A	#N/A	#N/A	#N/A	#N/A	#N/A	#N/A	#N/A	#N/A	#N/A	1.8	#N/A		#N/A	#N/A	#N/A	#N/A	#N/A	#N/A	#N/A	#N/A	#N/A	#N/A	#N/A	#N/A	#N/A
	#N/A	#N/A	#N/A	#N/A	#N/A	#N/A	#N/A	#N/A	#N/A	#N/A	#N/A	#N/A	#N/A	#N/A	#N/A	0.00266248	#N/A		#N/A	#N/A	#N/A	#N/A	#N/A	#N/A	#N/A	#N/A	#N/A	#N/A	#N/A	#N/A	#N/A	#N/A	#N/A	1.5	#N/A		#N/A	#N/A	#N/A	#N/A	#N/A	#N/A	#N/A	#N/A	#N/A	#N/A	#N/A	#N/A	#N/A
	#N/A	#N/A	#N/A	#N/A	#N/A	#N/A	#N/A	#N/A	#N/A	#N/A	#N/A	#N/A	#N/A	#N/A	#N/A	0	#N/A		#N/A	#N/A	#N/A	#N/A	#N/A	#N/A	#N/A	#N/A	#N/A	#N/A	#N/A	#N/A	#N/A	#N/A	#N/A	0.1	#N/A		#N/A	#N/A	#N/A	#N/A	#N/A	#N/A	#N/A	#N/A	#N/A	#N/A	#N/A	#N/A	#N/A
	#N/A	#N/A	#N/A	#N/A	#N/A	#N/A	#N/A	#N/A	#N/A	#N/A	#N/A	#N/A	#N/A	#N/A	#N/A	0	#N/A		#N/A	#N/A	#N/A	#N/A	#N/A	#N/A	#N/A	#N/A	#N/A	#N/A	#N/A	#N/A	#N/A	#N/A	#N/A	1	#N/A		#N/A	#N/A	#N/A	#N/A	#N/A	#N/A	#N/A	#N/A	#N/A	#N/A	#N/A	#N/A	#N/A
	#N/A	#N/A	#N/A	#N/A	#N/A	#N/A	#N/A	#N/A	#N/A	#N/A	#N/A	#N/A	#N/A	#N/A	#N/A	0.0021586	#N/A		#N/A	#N/A	#N/A	#N/A	#N/A	#N/A	#N/A	#N/A	#N/A	#N/A	#N/A	#N/A	#N/A	#N/A	#N/A	1.3	#N/A		#N/A	#N/A	#N/A	#N/A	#N/A	#N/A	#N/A	#N/A	#N/A	#N/A	#N/A	#N/A	#N/A
	#N/A	#N/A	#N/A	#N/A	#N/A	#N/A	#N/A	#N/A	#N/A	#N/A	#N/A	#N/A	#N/A	#N/A	#N/A	0.0020149	#N/A		#N/A	#N/A	#N/A	#N/A	#N/A	#N/A	#N/A	#N/A	#N/A	#N/A	#N/A	#N/A	#N/A	#N/A	#N/A	1.4	#N/A		#N/A	#N/A	#N/A	#N/A	#N/A	#N/A	#N/A	#N/A	#N/A	#N/A	#N/A	#N/A	#N/A
	#N/A	#N/A	#N/A	0.472954	#N/A	#N/A	#N/A	#N/A	#N/A	#N/A	#N/A	#N/A	#N/A	#N/A	#N/A	#N/A	#N/A		#N/A	#N/A	#N/A	27.6	#N/A	#N/A	#N/A	#N/A	#N/A	#N/A	#N/A	#N/A	#N/A	#N/A	#N/A	#N/A	#N/A		#N/A	#N/A	#N/A	72	#N/A	#N/A	#N/A	#N/A	#N/A	#N/A	#N/A	#N/A	#N/A
	#N/A	#N/A	#N/A	0.370502	#N/A	#N/A	#N/A	#N/A	#N/A	#N/A	#N/A	#N/A	#N/A	#N/A	#N/A	#N/A	#N/A		#N/A	#N/A	#N/A	26.2	#N/A	#N/A	#N/A	#N/A	#N/A	#N/A	#N/A	#N/A	#N/A	#N/A	#N/A	#N/A	#N/A		#N/A	#N/A	#N/A	48	#N/A	#N/A	#N/A	#N/A	#N/A	#N/A	#N/A	#N/A	#N/A
	#N/A	#N/A	#N/A	1.90786	#N/A	#N/A	#N/A	#N/A	#N/A	#N/A	#N/A	#N/A	#N/A	#N/A	#N/A	#N/A	#N/A		#N/A	#N/A	#N/A	36	#N/A	#N/A	#N/A	#N/A	#N/A	#N/A	#N/A	#N/A	#N/A	#N/A	#N/A	#N/A	#N/A		#N/A	#N/A	#N/A	62	#N/A	#N/A	#N/A	#N/A	#N/A	#N/A	#N/A	#N/A	#N/A
	#N/A	#N/A	#N/A	0.419847	#N/A	#N/A	#N/A	#N/A	#N/A	#N/A	#N/A	#N/A	#N/A	#N/A	#N/A	#N/A	#N/A		#N/A	#N/A	#N/A	27.3	#N/A	#N/A	#N/A	#N/A	#N/A	#N/A	#N/A	#N/A	#N/A	#N/A	#N/A	#N/A	#N/A		#N/A	#N/A	#N/A	41	#N/A	#N/A	#N/A	#N/A	#N/A	#N/A	#N/A	#N/A	#N/A
	#N/A	#N/A	#N/A	0.343542	#N/A	#N/A	#N/A	#N/A	#N/A	#N/A	#N/A	#N/A	#N/A	#N/A	#N/A	#N/A	#N/A		#N/A	#N/A	#N/A	25	#N/A	#N/A	#N/A	#N/A	#N/A	#N/A	#N/A	#N/A	#N/A	#N/A	#N/A	#N/A	#N/A		#N/A	#N/A	#N/A	60	#N/A	#N/A	#N/A	#N/A	#N/A	#N/A	#N/A	#N/A	#N/A
	#N/A	#N/A	#N/A	3.82092	#N/A	#N/A	#N/A	#N/A	#N/A	#N/A	#N/A	#N/A	#N/A	#N/A	#N/A	#N/A	#N/A		#N/A	#N/A	#N/A	44.2	#N/A	#N/A	#N/A	#N/A	#N/A	#N/A	#N/A	#N/A	#N/A	#N/A	#N/A	#N/A	#N/A		#N/A	#N/A	#N/A	42	#N/A	#N/A	#N/A	#N/A	#N/A	#N/A	#N/A	#N/A	#N/A
	#N/A	#N/A	#N/A	0.348404	#N/A	#N/A	#N/A	#N/A	#N/A	#N/A	#N/A	#N/A	#N/A	#N/A	#N/A	#N/A	#N/A		#N/A	#N/A	#N/A	24.5	#N/A	#N/A	#N/A	#N/A	#N/A	#N/A	#N/A	#N/A	#N/A	#N/A	#N/A	#N/A	#N/A		#N/A	#N/A	#N/A	66	#N/A	#N/A	#N/A	#N/A	#N/A	#N/A	#N/A	#N/A	#N/A
	#N/A	#N/A	#N/A	0.410425	#N/A	#N/A	#N/A	#N/A	#N/A	#N/A	#N/A	#N/A	#N/A	#N/A	#N/A	#N/A	#N/A		#N/A	#N/A	#N/A	26.5	#N/A	#N/A	#N/A	#N/A	#N/A	#N/A	#N/A	#N/A	#N/A	#N/A	#N/A	#N/A	#N/A		#N/A	#N/A	#N/A	37	#N/A	#N/A	#N/A	#N/A	#N/A	#N/A	#N/A	#N/A	#N/A
	#N/A	#N/A	#N/A	3.52853	#N/A	#N/A	#N/A	#N/A	#N/A	#N/A	#N/A	#N/A	#N/A	#N/A	#N/A	#N/A	#N/A		#N/A	#N/A	#N/A	47.5	#N/A	#N/A	#N/A	#N/A	#N/A	#N/A	#N/A	#N/A	#N/A	#N/A	#N/A	#N/A	#N/A		#N/A	#N/A	#N/A	19	#N/A	#N/A	#N/A	#N/A	#N/A	#N/A	#N/A	#N/A	#N/A
	#N/A	#N/A	#N/A	0.350624	#N/A	#N/A	#N/A	#N/A	#N/A	#N/A	#N/A	#N/A	#N/A	#N/A	#N/A	#N/A	#N/A		#N/A	#N/A	#N/A	25.7	#N/A	#N/A	#N/A	#N/A	#N/A	#N/A	#N/A	#N/A	#N/A	#N/A	#N/A	#N/A	#N/A		#N/A	#N/A	#N/A	31	#N/A	#N/A	#N/A	#N/A	#N/A	#N/A	#N/A	#N/A	#N/A
	#N/A	#N/A	#N/A	0.361352	#N/A	#N/A	#N/A	#N/A	#N/A	#N/A	#N/A	#N/A	#N/A	#N/A	#N/A	#N/A	#N/A		#N/A	#N/A	#N/A	25.9	#N/A	#N/A	#N/A	#N/A	#N/A	#N/A	#N/A	#N/A	#N/A	#N/A	#N/A	#N/A	#N/A		#N/A	#N/A	#N/A	67	#N/A	#N/A	#N/A	#N/A	#N/A	#N/A	#N/A	#N/A	#N/A
	#N/A	#N/A	#N/A	4.4735	#N/A	#N/A	#N/A	#N/A	#N/A	#N/A	#N/A	#N/A	#N/A	#N/A	#N/A	#N/A	#N/A		#N/A	#N/A	#N/A	51.2	#N/A	#N/A	#N/A	#N/A	#N/A	#N/A	#N/A	#N/A	#N/A	#N/A	#N/A	#N/A	#N/A		#N/A	#N/A	#N/A	0	#N/A	#N/A	#N/A	#N/A	#N/A	#N/A	#N/A	#N/A	#N/A
	#N/A	#N/A	#N/A	#N/A	#N/A	#N/A	#N/A	#N/A	#N/A	#N/A	#N/A	#N/A	#N/A	#N/A	0.0380993	#N/A	#N/A		#N/A	#N/A	#N/A	#N/A	#N/A	#N/A	#N/A	#N/A	#N/A	#N/A	#N/A	#N/A	#N/A	#N/A	7.4	#N/A	#N/A		#N/A	#N/A	#N/A	#N/A	#N/A	#N/A	#N/A	#N/A	#N/A	#N/A	#N/A	#N/A	#N/A
	#N/A	#N/A	#N/A	#N/A	#N/A	#N/A	#N/A	#N/A	2.35796	#N/A	#N/A	#N/A	#N/A	#N/A	#N/A	#N/A	#N/A		#N/A	#N/A	#N/A	#N/A	#N/A	#N/A	#N/A	#N/A	45.5	#N/A	#N/A	#N/A	#N/A	#N/A	#N/A	#N/A	#N/A		#N/A	#N/A	#N/A	#N/A	#N/A	#N/A	#N/A	#N/A	46	#N/A	#N/A	#N/A	#N/A
	#N/A	#N/A	#N/A	#N/A	#N/A	#N/A	#N/A	#N/A	0.277584	#N/A	#N/A	#N/A	#N/A	#N/A	#N/A	#N/A	#N/A		#N/A	#N/A	#N/A	#N/A	#N/A	#N/A	#N/A	#N/A	23.9	#N/A	#N/A	#N/A	#N/A	#N/A	#N/A	#N/A	#N/A		#N/A	#N/A	#N/A	#N/A	#N/A	#N/A	#N/A	#N/A	90	#N/A	#N/A	#N/A	#N/A
	#N/A	#N/A	#N/A	#N/A	#N/A	#N/A	#N/A	#N/A	#N/A	4.69796	#N/A	#N/A	#N/A	#N/A	#N/A	#N/A	#N/A		#N/A	#N/A	#N/A	#N/A	#N/A	#N/A	#N/A	#N/A	#N/A	55.5	#N/A	#N/A	#N/A	#N/A	#N/A	#N/A	#N/A		#N/A	#N/A	#N/A	#N/A	#N/A	#N/A	#N/A	#N/A	#N/A	58	#N/A	#N/A	#N/A
	1.67654	#N/A	#N/A	#N/A	#N/A	#N/A	#N/A	#N/A	#N/A	#N/A	#N/A	#N/A	#N/A	#N/A	#N/A	#N/A	#N/A		49.9	#N/A	#N/A	#N/A	#N/A	#N/A	#N/A	#N/A	#N/A	#N/A	#N/A	#N/A	#N/A	#N/A	#N/A	#N/A	#N/A		0	#N/A	#N/A	#N/A	#N/A	#N/A	#N/A	#N/A	#N/A	#N/A	#N/A	#N/A	#N/A
	#N/A	#N/A	#N/A	#N/A	#N/A	#N/A	#N/A	#N/A	#N/A	5.33446	#N/A	#N/A	#N/A	#N/A	#N/A	#N/A	#N/A		#N/A	#N/A	#N/A	#N/A	#N/A	#N/A	#N/A	#N/A	#N/A	54.5	#N/A	#N/A	#N/A	#N/A	#N/A	#N/A	#N/A		#N/A	#N/A	#N/A	#N/A	#N/A	#N/A	#N/A	#N/A	#N/A	65	#N/A	#N/A	#N/A
	10.7688	#N/A	#N/A	#N/A	#N/A	#N/A	#N/A	#N/A	#N/A	#N/A	#N/A	#N/A	#N/A	#N/A	#N/A	#N/A	#N/A		105.9	#N/A	#N/A	#N/A	#N/A	#N/A	#N/A	#N/A	#N/A	#N/A	#N/A	#N/A	#N/A	#N/A	#N/A	#N/A	#N/A		0	#N/A	#N/A	#N/A	#N/A	#N/A	#N/A	#N/A	#N/A	#N/A	#N/A	#N/A	#N/A
	#N/A	#N/A	#N/A	#N/A	#N/A	#N/A	#N/A	#N/A	#N/A	2.27435	#N/A	#N/A	#N/A	#N/A	#N/A	#N/A	#N/A		#N/A	#N/A	#N/A	#N/A	#N/A	#N/A	#N/A	#N/A	#N/A	33.5	#N/A	#N/A	#N/A	#N/A	#N/A	#N/A	#N/A		#N/A	#N/A	#N/A	#N/A	#N/A	#N/A	#N/A	#N/A	#N/A	47	#N/A	#N/A	#N/A
	6.87665	#N/A	#N/A	#N/A	#N/A	#N/A	#N/A	#N/A	#N/A	#N/A	#N/A	#N/A	#N/A	#N/A	#N/A	#N/A	#N/A		48.4	#N/A	#N/A	#N/A	#N/A	#N/A	#N/A	#N/A	#N/A	#N/A	#N/A	#N/A	#N/A	#N/A	#N/A	#N/A	#N/A		0	#N/A	#N/A	#N/A	#N/A	#N/A	#N/A	#N/A	#N/A	#N/A	#N/A	#N/A	#N/A
	#N/A	#N/A	#N/A	#N/A	#N/A	#N/A	#N/A	#N/A	#N/A	#N/A	#N/A	#N/A	#N/A	#N/A	#N/A	0	#N/A		#N/A	#N/A	#N/A	#N/A	#N/A	#N/A	#N/A	#N/A	#N/A	#N/A	#N/A	#N/A	#N/A	#N/A	#N/A	0.1	#N/A		#N/A	#N/A	#N/A	#N/A	#N/A	#N/A	#N/A	#N/A	#N/A	#N/A	#N/A	#N/A	#N/A
	#N/A	#N/A	#N/A	#N/A	#N/A	#N/A	#N/A	#N/A	#N/A	#N/A	#N/A	#N/A	#N/A	#N/A	#N/A	0.025452	#N/A		#N/A	#N/A	#N/A	#N/A	#N/A	#N/A	#N/A	#N/A	#N/A	#N/A	#N/A	#N/A	#N/A	#N/A	#N/A	3.1	#N/A		#N/A	#N/A	#N/A	#N/A	#N/A	#N/A	#N/A	#N/A	#N/A	#N/A	#N/A	#N/A	#N/A
	#N/A	#N/A	#N/A	#N/A	#N/A	#N/A	#N/A	#N/A	#N/A	#N/A	#N/A	#N/A	#N/A	#N/A	#N/A	0.00857604	#N/A		#N/A	#N/A	#N/A	#N/A	#N/A	#N/A	#N/A	#N/A	#N/A	#N/A	#N/A	#N/A	#N/A	#N/A	#N/A	2.6	#N/A		#N/A	#N/A	#N/A	#N/A	#N/A	#N/A	#N/A	#N/A	#N/A	#N/A	#N/A	#N/A	#N/A
	#N/A	#N/A	#N/A	#N/A	#N/A	#N/A	#N/A	#N/A	#N/A	#N/A	#N/A	#N/A	#N/A	#N/A	#N/A	0.00285575	#N/A		#N/A	#N/A	#N/A	#N/A	#N/A	#N/A	#N/A	#N/A	#N/A	#N/A	#N/A	#N/A	#N/A	#N/A	#N/A	1.6	#N/A		#N/A	#N/A	#N/A	#N/A	#N/A	#N/A	#N/A	#N/A	#N/A	#N/A	#N/A	#N/A	#N/A
	#N/A	#N/A	#N/A	#N/A	#N/A	#N/A	#N/A	#N/A	#N/A	3.68589	#N/A	#N/A	#N/A	#N/A	#N/A	#N/A	#N/A		#N/A	#N/A	#N/A	#N/A	#N/A	#N/A	#N/A	#N/A	#N/A	42.4	#N/A	#N/A	#N/A	#N/A	#N/A	#N/A	#N/A		#N/A	#N/A	#N/A	#N/A	#N/A	#N/A	#N/A	#N/A	#N/A	#N/A	#N/A	#N/A	#N/A
	#N/A	#N/A	#N/A	#N/A	#N/A	#N/A	#N/A	#N/A	#N/A	8.24163	#N/A	#N/A	#N/A	#N/A	#N/A	#N/A	#N/A		#N/A	#N/A	#N/A	#N/A	#N/A	#N/A	#N/A	#N/A	#N/A	67.9	#N/A	#N/A	#N/A	#N/A	#N/A	#N/A	#N/A		#N/A	#N/A	#N/A	#N/A	#N/A	#N/A	#N/A	#N/A	#N/A	#N/A	#N/A	#N/A	#N/A
	#N/A	#N/A	#N/A	#N/A	#N/A	#N/A	#N/A	#N/A	1.97829	#N/A	#N/A	#N/A	#N/A	#N/A	#N/A	#N/A	#N/A		#N/A	#N/A	#N/A	#N/A	#N/A	#N/A	#N/A	#N/A	57.1	#N/A	#N/A	#N/A	#N/A	#N/A	#N/A	#N/A	#N/A		#N/A	#N/A	#N/A	#N/A	#N/A	#N/A	#N/A	#N/A	#N/A	#N/A	#N/A	#N/A	#N/A
	#N/A	#N/A	#N/A	#N/A	#N/A	#N/A	#N/A	#N/A	#N/A	#N/A	#N/A	#N/A	#N/A	#N/A	#N/A	#N/A	0		#N/A	#N/A	#N/A	#N/A	#N/A	#N/A	#N/A	#N/A	#N/A	#N/A	#N/A	#N/A	#N/A	#N/A	#N/A	#N/A	0		#N/A	#N/A	#N/A	#N/A	#N/A	#N/A	#N/A	#N/A	#N/A	#N/A	#N/A	#N/A	#N/A
	#N/A	#N/A	#N/A	#N/A	#N/A	#N/A	#N/A	#N/A	#N/A	#N/A	#N/A	#N/A	#N/A	#N/A	#N/A	#N/A	0		#N/A	#N/A	#N/A	#N/A	#N/A	#N/A	#N/A	#N/A	#N/A	#N/A	#N/A	#N/A	#N/A	#N/A	#N/A	#N/A	0		#N/A	#N/A	#N/A	#N/A	#N/A	#N/A	#N/A	#N/A	#N/A	#N/A	#N/A	#N/A	#N/A
	#N/A	#N/A	#N/A	#N/A	#N/A	3.09116	#N/A	#N/A	#N/A	#N/A	#N/A	#N/A	#N/A	#N/A	#N/A	#N/A	#N/A		#N/A	#N/A	#N/A	#N/A	#N/A	33.5	#N/A	#N/A	#N/A	#N/A	#N/A	#N/A	#N/A	#N/A	#N/A	#N/A	#N/A		#N/A	#N/A	#N/A	#N/A	#N/A	#N/A	#N/A	#N/A	#N/A	#N/A	#N/A	#N/A	#N/A
	#N/A	#N/A	#N/A	#N/A	0.039353	#N/A	#N/A	#N/A	#N/A	#N/A	#N/A	#N/A	#N/A	#N/A	#N/A	#N/A	#N/A		#N/A	#N/A	#N/A	#N/A	5.6	#N/A	#N/A	#N/A	#N/A	#N/A	#N/A	#N/A	#N/A	#N/A	#N/A	#N/A	#N/A		#N/A	#N/A	#N/A	#N/A	#N/A	#N/A	#N/A	#N/A	#N/A	#N/A	#N/A	#N/A	#N/A
	#N/A	#N/A	#N/A	#N/A	#N/A	#N/A	#N/A	#N/A	#N/A	11.2313	#N/A	#N/A	#N/A	#N/A	#N/A	#N/A	#N/A		#N/A	#N/A	#N/A	#N/A	#N/A	#N/A	#N/A	#N/A	#N/A	83.1	#N/A	#N/A	#N/A	#N/A	#N/A	#N/A	#N/A		#N/A	#N/A	#N/A	#N/A	#N/A	#N/A	#N/A	#N/A	#N/A	#N/A	#N/A	#N/A	#N/A
	#N/A	#N/A	#N/A	#N/A	#N/A	#N/A	#N/A	#N/A	#N/A	3.4004	#N/A	#N/A	#N/A	#N/A	#N/A	#N/A	#N/A		#N/A	#N/A	#N/A	#N/A	#N/A	#N/A	#N/A	#N/A	#N/A	43.8	#N/A	#N/A	#N/A	#N/A	#N/A	#N/A	#N/A		#N/A	#N/A	#N/A	#N/A	#N/A	#N/A	#N/A	#N/A	#N/A	#N/A	#N/A	#N/A	#N/A
	#N/A	#N/A	#N/A	#N/A	#N/A	#N/A	#N/A	#N/A	#N/A	5.33549	#N/A	#N/A	#N/A	#N/A	#N/A	#N/A	#N/A		#N/A	#N/A	#N/A	#N/A	#N/A	#N/A	#N/A	#N/A	#N/A	55.4	#N/A	#N/A	#N/A	#N/A	#N/A	#N/A	#N/A		#N/A	#N/A	#N/A	#N/A	#N/A	#N/A	#N/A	#N/A	#N/A	#N/A	#N/A	#N/A	#N/A
	#N/A	#N/A	#N/A	#N/A	#N/A	#N/A	#N/A	#N/A	#N/A	15.8137	#N/A	#N/A	#N/A	#N/A	#N/A	#N/A	#N/A		#N/A	#N/A	#N/A	#N/A	#N/A	#N/A	#N/A	#N/A	#N/A	89.4	#N/A	#N/A	#N/A	#N/A	#N/A	#N/A	#N/A		#N/A	#N/A	#N/A	#N/A	#N/A	#N/A	#N/A	#N/A	#N/A	#N/A	#N/A	#N/A	#N/A
	#N/A	#N/A	#N/A	#N/A	#N/A	#N/A	#N/A	#N/A	0.609426	#N/A	#N/A	#N/A	#N/A	#N/A	#N/A	#N/A	#N/A		#N/A	#N/A	#N/A	#N/A	#N/A	#N/A	#N/A	#N/A	28.6	#N/A	#N/A	#N/A	#N/A	#N/A	#N/A	#N/A	#N/A		#N/A	#N/A	#N/A	#N/A	#N/A	#N/A	#N/A	#N/A	#N/A	#N/A	#N/A	#N/A	#N/A
	#N/A	#N/A	#N/A	#N/A	#N/A	#N/A	#N/A	#N/A	#N/A	5.69896	#N/A	#N/A	#N/A	#N/A	#N/A	#N/A	#N/A		#N/A	#N/A	#N/A	#N/A	#N/A	#N/A	#N/A	#N/A	#N/A	55.4	#N/A	#N/A	#N/A	#N/A	#N/A	#N/A	#N/A		#N/A	#N/A	#N/A	#N/A	#N/A	#N/A	#N/A	#N/A	#N/A	#N/A	#N/A	#N/A	#N/A
	#N/A	#N/A	#N/A	#N/A	#N/A	#N/A	#N/A	#N/A	#N/A	11.1032	#N/A	#N/A	#N/A	#N/A	#N/A	#N/A	#N/A		#N/A	#N/A	#N/A	#N/A	#N/A	#N/A	#N/A	#N/A	#N/A	106.8	#N/A	#N/A	#N/A	#N/A	#N/A	#N/A	#N/A		#N/A	#N/A	#N/A	#N/A	#N/A	#N/A	#N/A	#N/A	#N/A	#N/A	#N/A	#N/A	#N/A
	#N/A	#N/A	#N/A	#N/A	#N/A	#N/A	#N/A	#N/A	2.09954	#N/A	#N/A	#N/A	#N/A	#N/A	#N/A	#N/A	#N/A		#N/A	#N/A	#N/A	#N/A	#N/A	#N/A	#N/A	#N/A	48.4	#N/A	#N/A	#N/A	#N/A	#N/A	#N/A	#N/A	#N/A		#N/A	#N/A	#N/A	#N/A	#N/A	#N/A	#N/A	#N/A	#N/A	#N/A	#N/A	#N/A	#N/A
	#N/A	#N/A	#N/A	#N/A	#N/A	#N/A	#N/A	#N/A	0.668071	#N/A	#N/A	#N/A	#N/A	#N/A	#N/A	#N/A	#N/A		#N/A	#N/A	#N/A	#N/A	#N/A	#N/A	#N/A	#N/A	28.8	#N/A	#N/A	#N/A	#N/A	#N/A	#N/A	#N/A	#N/A		#N/A	#N/A	#N/A	#N/A	#N/A	#N/A	#N/A	#N/A	#N/A	#N/A	#N/A	#N/A	#N/A
	#N/A	#N/A	#N/A	#N/A	#N/A	#N/A	#N/A	#N/A	#N/A	3.89681	#N/A	#N/A	#N/A	#N/A	#N/A	#N/A	#N/A		#N/A	#N/A	#N/A	#N/A	#N/A	#N/A	#N/A	#N/A	#N/A	42.2	#N/A	#N/A	#N/A	#N/A	#N/A	#N/A	#N/A		#N/A	#N/A	#N/A	#N/A	#N/A	#N/A	#N/A	#N/A	#N/A	#N/A	#N/A	#N/A	#N/A
	#N/A	#N/A	#N/A	#N/A	#N/A	#N/A	#N/A	#N/A	2.54344	#N/A	#N/A	#N/A	#N/A	#N/A	#N/A	#N/A	#N/A		#N/A	#N/A	#N/A	#N/A	#N/A	#N/A	#N/A	#N/A	54.5	#N/A	#N/A	#N/A	#N/A	#N/A	#N/A	#N/A	#N/A		#N/A	#N/A	#N/A	#N/A	#N/A	#N/A	#N/A	#N/A	#N/A	#N/A	#N/A	#N/A	#N/A
	#N/A	#N/A	#N/A	#N/A	#N/A	#N/A	#N/A	#N/A	#N/A	9.07676	#N/A	#N/A	#N/A	#N/A	#N/A	#N/A	#N/A		#N/A	#N/A	#N/A	#N/A	#N/A	#N/A	#N/A	#N/A	#N/A	64.5	#N/A	#N/A	#N/A	#N/A	#N/A	#N/A	#N/A		#N/A	#N/A	#N/A	#N/A	#N/A	#N/A	#N/A	#N/A	#N/A	#N/A	#N/A	#N/A	#N/A
	#N/A	#N/A	#N/A	#N/A	#N/A	#N/A	#N/A	#N/A	2.16303	#N/A	#N/A	#N/A	#N/A	#N/A	#N/A	#N/A	#N/A		#N/A	#N/A	#N/A	#N/A	#N/A	#N/A	#N/A	#N/A	53.3	#N/A	#N/A	#N/A	#N/A	#N/A	#N/A	#N/A	#N/A		#N/A	#N/A	#N/A	#N/A	#N/A	#N/A	#N/A	#N/A	#N/A	#N/A	#N/A	#N/A	#N/A
	#N/A	#N/A	#N/A	#N/A	#N/A	#N/A	#N/A	#N/A	#N/A	7.52171	#N/A	#N/A	#N/A	#N/A	#N/A	#N/A	#N/A		#N/A	#N/A	#N/A	#N/A	#N/A	#N/A	#N/A	#N/A	#N/A	61	#N/A	#N/A	#N/A	#N/A	#N/A	#N/A	#N/A		#N/A	#N/A	#N/A	#N/A	#N/A	#N/A	#N/A	#N/A	#N/A	#N/A	#N/A	#N/A	#N/A
	#N/A	#N/A	#N/A	#N/A	#N/A	#N/A	#N/A	#N/A	#N/A	14.9864	#N/A	#N/A	#N/A	#N/A	#N/A	#N/A	#N/A		#N/A	#N/A	#N/A	#N/A	#N/A	#N/A	#N/A	#N/A	#N/A	94.2	#N/A	#N/A	#N/A	#N/A	#N/A	#N/A	#N/A		#N/A	#N/A	#N/A	#N/A	#N/A	#N/A	#N/A	#N/A	#N/A	#N/A	#N/A	#N/A	#N/A
	#N/A	#N/A	#N/A	#N/A	#N/A	#N/A	#N/A	#N/A	2.10372	#N/A	#N/A	#N/A	#N/A	#N/A	#N/A	#N/A	#N/A		#N/A	#N/A	#N/A	#N/A	#N/A	#N/A	#N/A	#N/A	34.1	#N/A	#N/A	#N/A	#N/A	#N/A	#N/A	#N/A	#N/A		#N/A	#N/A	#N/A	#N/A	#N/A	#N/A	#N/A	#N/A	#N/A	#N/A	#N/A	#N/A	#N/A
	#N/A	#N/A	#N/A	#N/A	#N/A	#N/A	#N/A	#N/A	8.02361	#N/A	#N/A	#N/A	#N/A	#N/A	#N/A	#N/A	#N/A		#N/A	#N/A	#N/A	#N/A	#N/A	#N/A	#N/A	#N/A	52.9	#N/A	#N/A	#N/A	#N/A	#N/A	#N/A	#N/A	#N/A		#N/A	#N/A	#N/A	#N/A	#N/A	#N/A	#N/A	#N/A	#N/A	#N/A	#N/A	#N/A	#N/A
	0	#N/A	#N/A	#N/A	#N/A	#N/A	#N/A	#N/A	#N/A	#N/A	#N/A	#N/A	#N/A	#N/A	#N/A	#N/A	#N/A		0	#N/A	#N/A	#N/A	#N/A	#N/A	#N/A	#N/A	#N/A	#N/A	#N/A	#N/A	#N/A	#N/A	#N/A	#N/A	#N/A		#N/A	#N/A	#N/A	#N/A	#N/A	#N/A	#N/A	#N/A	#N/A	#N/A	#N/A	#N/A	#N/A
	#N/A	0.0009538	#N/A	#N/A	#N/A	#N/A	#N/A	#N/A	#N/A	#N/A	#N/A	#N/A	#N/A	#N/A	#N/A	#N/A	#N/A		#N/A	1	#N/A	#N/A	#N/A	#N/A	#N/A	#N/A	#N/A	#N/A	#N/A	#N/A	#N/A	#N/A	#N/A	#N/A	#N/A		#N/A	#N/A	#N/A	#N/A	#N/A	#N/A	#N/A	#N/A	#N/A	#N/A	#N/A	#N/A	#N/A
	8.82235	#N/A	#N/A	#N/A	#N/A	#N/A	#N/A	#N/A	#N/A	#N/A	#N/A	#N/A	#N/A	#N/A	#N/A	#N/A	#N/A		116.8	#N/A	#N/A	#N/A	#N/A	#N/A	#N/A	#N/A	#N/A	#N/A	#N/A	#N/A	#N/A	#N/A	#N/A	#N/A	#N/A		#N/A	#N/A	#N/A	#N/A	#N/A	#N/A	#N/A	#N/A	#N/A	#N/A	#N/A	#N/A	#N/A
	#N/A	#N/A	3.09801	#N/A	#N/A	#N/A	#N/A	#N/A	#N/A	#N/A	#N/A	#N/A	#N/A	#N/A	#N/A	#N/A	#N/A		#N/A	#N/A	50.1	#N/A	#N/A	#N/A	#N/A	#N/A	#N/A	#N/A	#N/A	#N/A	#N/A	#N/A	#N/A	#N/A	#N/A		#N/A	#N/A	0	#N/A	#N/A	#N/A	#N/A	#N/A	#N/A	#N/A	#N/A	#N/A	#N/A
	#N/A	0.00193646	#N/A	#N/A	#N/A	#N/A	#N/A	#N/A	#N/A	#N/A	#N/A	#N/A	#N/A	#N/A	#N/A	#N/A	#N/A		#N/A	0.7	#N/A	#N/A	#N/A	#N/A	#N/A	#N/A	#N/A	#N/A	#N/A	#N/A	#N/A	#N/A	#N/A	#N/A	#N/A		#N/A	86	#N/A	#N/A	#N/A	#N/A	#N/A	#N/A	#N/A	#N/A	#N/A	#N/A	#N/A
	#N/A	0.000272335	#N/A	#N/A	#N/A	#N/A	#N/A	#N/A	#N/A	#N/A	#N/A	#N/A	#N/A	#N/A	#N/A	#N/A	#N/A		#N/A	0.2	#N/A	#N/A	#N/A	#N/A	#N/A	#N/A	#N/A	#N/A	#N/A	#N/A	#N/A	#N/A	#N/A	#N/A	#N/A		#N/A	0	#N/A	#N/A	#N/A	#N/A	#N/A	#N/A	#N/A	#N/A	#N/A	#N/A	#N/A
	#N/A	0	#N/A	#N/A	#N/A	#N/A	#N/A	#N/A	#N/A	#N/A	#N/A	#N/A	#N/A	#N/A	#N/A	#N/A	#N/A		#N/A	0	#N/A	#N/A	#N/A	#N/A	#N/A	#N/A	#N/A	#N/A	#N/A	#N/A	#N/A	#N/A	#N/A	#N/A	#N/A		#N/A	#N/A	#N/A	#N/A	#N/A	#N/A	#N/A	#N/A	#N/A	#N/A	#N/A	#N/A	#N/A
	4.26959	#N/A	#N/A	#N/A	#N/A	#N/A	#N/A	#N/A	#N/A	#N/A	#N/A	#N/A	#N/A	#N/A	#N/A	#N/A	#N/A		88.6	#N/A	#N/A	#N/A	#N/A	#N/A	#N/A	#N/A	#N/A	#N/A	#N/A	#N/A	#N/A	#N/A	#N/A	#N/A	#N/A		#N/A	#N/A	#N/A	#N/A	#N/A	#N/A	#N/A	#N/A	#N/A	#N/A	#N/A	#N/A	#N/A
	#N/A	0	#N/A	#N/A	#N/A	#N/A	#N/A	#N/A	#N/A	#N/A	#N/A	#N/A	#N/A	#N/A	#N/A	#N/A	#N/A		#N/A	0	#N/A	#N/A	#N/A	#N/A	#N/A	#N/A	#N/A	#N/A	#N/A	#N/A	#N/A	#N/A	#N/A	#N/A	#N/A		#N/A	#N/A	#N/A	#N/A	#N/A	#N/A	#N/A	#N/A	#N/A	#N/A	#N/A	#N/A	#N/A
	#N/A	#N/A	#N/A	#N/A	#N/A	#N/A	#N/A	#N/A	#N/A	4.41501	#N/A	#N/A	#N/A	#N/A	#N/A	#N/A	#N/A		#N/A	#N/A	#N/A	#N/A	#N/A	#N/A	#N/A	#N/A	#N/A	51.4	#N/A	#N/A	#N/A	#N/A	#N/A	#N/A	#N/A		#N/A	#N/A	#N/A	#N/A	#N/A	#N/A	#N/A	#N/A	#N/A	0	#N/A	#N/A	#N/A
	1.73824	#N/A	#N/A	#N/A	#N/A	#N/A	#N/A	#N/A	#N/A	#N/A	#N/A	#N/A	#N/A	#N/A	#N/A	#N/A	#N/A		51.2	#N/A	#N/A	#N/A	#N/A	#N/A	#N/A	#N/A	#N/A	#N/A	#N/A	#N/A	#N/A	#N/A	#N/A	#N/A	#N/A		0	#N/A	#N/A	#N/A	#N/A	#N/A	#N/A	#N/A	#N/A	#N/A	#N/A	#N/A	#N/A
	#N/A	#N/A	#N/A	#N/A	#N/A	#N/A	#N/A	#N/A	0.633673	#N/A	#N/A	#N/A	#N/A	#N/A	#N/A	#N/A	#N/A		#N/A	#N/A	#N/A	#N/A	#N/A	#N/A	#N/A	#N/A	27.9	#N/A	#N/A	#N/A	#N/A	#N/A	#N/A	#N/A	#N/A		#N/A	#N/A	#N/A	#N/A	#N/A	#N/A	#N/A	#N/A	82	#N/A	#N/A	#N/A	#N/A
	#N/A	#N/A	#N/A	#N/A	#N/A	#N/A	#N/A	#N/A	0.778458	#N/A	#N/A	#N/A	#N/A	#N/A	#N/A	#N/A	#N/A		#N/A	#N/A	#N/A	#N/A	#N/A	#N/A	#N/A	#N/A	24.6	#N/A	#N/A	#N/A	#N/A	#N/A	#N/A	#N/A	#N/A		#N/A	#N/A	#N/A	#N/A	#N/A	#N/A	#N/A	#N/A	99	#N/A	#N/A	#N/A	#N/A
	#N/A	#N/A	#N/A	#N/A	#N/A	#N/A	#N/A	#N/A	0.682678	#N/A	#N/A	#N/A	#N/A	#N/A	#N/A	#N/A	#N/A		#N/A	#N/A	#N/A	#N/A	#N/A	#N/A	#N/A	#N/A	28.6	#N/A	#N/A	#N/A	#N/A	#N/A	#N/A	#N/A	#N/A		#N/A	#N/A	#N/A	#N/A	#N/A	#N/A	#N/A	#N/A	0	#N/A	#N/A	#N/A	#N/A
	#N/A	0.0544833	#N/A	#N/A	#N/A	#N/A	#N/A	#N/A	#N/A	#N/A	#N/A	#N/A	#N/A	#N/A	#N/A	#N/A	#N/A		#N/A	2.7	#N/A	#N/A	#N/A	#N/A	#N/A	#N/A	#N/A	#N/A	#N/A	#N/A	#N/A	#N/A	#N/A	#N/A	#N/A		#N/A	67	#N/A	#N/A	#N/A	#N/A	#N/A	#N/A	#N/A	#N/A	#N/A	#N/A	#N/A
	#N/A	#N/A	#N/A	#N/A	#N/A	#N/A	#N/A	#N/A	2.77183	#N/A	#N/A	#N/A	#N/A	#N/A	#N/A	#N/A	#N/A		#N/A	#N/A	#N/A	#N/A	#N/A	#N/A	#N/A	#N/A	50.5	#N/A	#N/A	#N/A	#N/A	#N/A	#N/A	#N/A	#N/A		#N/A	#N/A	#N/A	#N/A	#N/A	#N/A	#N/A	#N/A	0	#N/A	#N/A	#N/A	#N/A
	#N/A	0.0559805	#N/A	#N/A	#N/A	#N/A	#N/A	#N/A	#N/A	#N/A	#N/A	#N/A	#N/A	#N/A	#N/A	#N/A	#N/A		#N/A	0.6	#N/A	#N/A	#N/A	#N/A	#N/A	#N/A	#N/A	#N/A	#N/A	#N/A	#N/A	#N/A	#N/A	#N/A	#N/A		#N/A	85	#N/A	#N/A	#N/A	#N/A	#N/A	#N/A	#N/A	#N/A	#N/A	#N/A	#N/A
	#N/A	#N/A	#N/A	#N/A	#N/A	#N/A	#N/A	#N/A	2.6486	#N/A	#N/A	#N/A	#N/A	#N/A	#N/A	#N/A	#N/A		#N/A	#N/A	#N/A	#N/A	#N/A	#N/A	#N/A	#N/A	49.2	#N/A	#N/A	#N/A	#N/A	#N/A	#N/A	#N/A	#N/A		#N/A	#N/A	#N/A	#N/A	#N/A	#N/A	#N/A	#N/A	0	#N/A	#N/A	#N/A	#N/A
	#N/A	0.0371712	#N/A	#N/A	#N/A	#N/A	#N/A	#N/A	#N/A	#N/A	#N/A	#N/A	#N/A	#N/A	#N/A	#N/A	#N/A		#N/A	1.3	#N/A	#N/A	#N/A	#N/A	#N/A	#N/A	#N/A	#N/A	#N/A	#N/A	#N/A	#N/A	#N/A	#N/A	#N/A		#N/A	63	#N/A	#N/A	#N/A	#N/A	#N/A	#N/A	#N/A	#N/A	#N/A	#N/A	#N/A
	#N/A	#N/A	#N/A	#N/A	#N/A	#N/A	#N/A	#N/A	0.793102	#N/A	#N/A	#N/A	#N/A	#N/A	#N/A	#N/A	#N/A		#N/A	#N/A	#N/A	#N/A	#N/A	#N/A	#N/A	#N/A	30.1	#N/A	#N/A	#N/A	#N/A	#N/A	#N/A	#N/A	#N/A		#N/A	#N/A	#N/A	#N/A	#N/A	#N/A	#N/A	#N/A	73	#N/A	#N/A	#N/A	#N/A
	#N/A	0.0547525	#N/A	#N/A	#N/A	#N/A	#N/A	#N/A	#N/A	#N/A	#N/A	#N/A	#N/A	#N/A	#N/A	#N/A	#N/A		#N/A	5.8	#N/A	#N/A	#N/A	#N/A	#N/A	#N/A	#N/A	#N/A	#N/A	#N/A	#N/A	#N/A	#N/A	#N/A	#N/A		#N/A	0	#N/A	#N/A	#N/A	#N/A	#N/A	#N/A	#N/A	#N/A	#N/A	#N/A	#N/A
	#N/A	#N/A	#N/A	#N/A	#N/A	#N/A	#N/A	#N/A	0.736095	#N/A	#N/A	#N/A	#N/A	#N/A	#N/A	#N/A	#N/A		#N/A	#N/A	#N/A	#N/A	#N/A	#N/A	#N/A	#N/A	29.3	#N/A	#N/A	#N/A	#N/A	#N/A	#N/A	#N/A	#N/A		#N/A	#N/A	#N/A	#N/A	#N/A	#N/A	#N/A	#N/A	0	#N/A	#N/A	#N/A	#N/A
	#N/A	0.0672291	#N/A	#N/A	#N/A	#N/A	#N/A	#N/A	#N/A	#N/A	#N/A	#N/A	#N/A	#N/A	#N/A	#N/A	#N/A		#N/A	6.2	#N/A	#N/A	#N/A	#N/A	#N/A	#N/A	#N/A	#N/A	#N/A	#N/A	#N/A	#N/A	#N/A	#N/A	#N/A		#N/A	96	#N/A	#N/A	#N/A	#N/A	#N/A	#N/A	#N/A	#N/A	#N/A	#N/A	#N/A
	#N/A	#N/A	#N/A	#N/A	#N/A	#N/A	#N/A	#N/A	0.491777	#N/A	#N/A	#N/A	#N/A	#N/A	#N/A	#N/A	#N/A		#N/A	#N/A	#N/A	#N/A	#N/A	#N/A	#N/A	#N/A	24.7	#N/A	#N/A	#N/A	#N/A	#N/A	#N/A	#N/A	#N/A		#N/A	#N/A	#N/A	#N/A	#N/A	#N/A	#N/A	#N/A	0	#N/A	#N/A	#N/A	#N/A
	#N/A	0.0429668	#N/A	#N/A	#N/A	#N/A	#N/A	#N/A	#N/A	#N/A	#N/A	#N/A	#N/A	#N/A	#N/A	#N/A	#N/A		#N/A	4.6	#N/A	#N/A	#N/A	#N/A	#N/A	#N/A	#N/A	#N/A	#N/A	#N/A	#N/A	#N/A	#N/A	#N/A	#N/A		#N/A	63	#N/A	#N/A	#N/A	#N/A	#N/A	#N/A	#N/A	#N/A	#N/A	#N/A	#N/A
	#N/A	#N/A	#N/A	#N/A	#N/A	#N/A	#N/A	#N/A	0.796747	#N/A	#N/A	#N/A	#N/A	#N/A	#N/A	#N/A	#N/A		#N/A	#N/A	#N/A	#N/A	#N/A	#N/A	#N/A	#N/A	30.4	#N/A	#N/A	#N/A	#N/A	#N/A	#N/A	#N/A	#N/A		#N/A	#N/A	#N/A	#N/A	#N/A	#N/A	#N/A	#N/A	0	#N/A	#N/A	#N/A	#N/A
	#N/A	0.0401142	#N/A	#N/A	#N/A	#N/A	#N/A	#N/A	#N/A	#N/A	#N/A	#N/A	#N/A	#N/A	#N/A	#N/A	#N/A		#N/A	8.5	#N/A	#N/A	#N/A	#N/A	#N/A	#N/A	#N/A	#N/A	#N/A	#N/A	#N/A	#N/A	#N/A	#N/A	#N/A		#N/A	68	#N/A	#N/A	#N/A	#N/A	#N/A	#N/A	#N/A	#N/A	#N/A	#N/A	#N/A
	#N/A	#N/A	#N/A	#N/A	#N/A	#N/A	#N/A	#N/A	#N/A	4.65414	#N/A	#N/A	#N/A	#N/A	#N/A	#N/A	#N/A		#N/A	#N/A	#N/A	#N/A	#N/A	#N/A	#N/A	#N/A	#N/A	48.3	#N/A	#N/A	#N/A	#N/A	#N/A	#N/A	#N/A		#N/A	#N/A	#N/A	#N/A	#N/A	#N/A	#N/A	#N/A	#N/A	0	#N/A	#N/A	#N/A
	10.7818	#N/A	#N/A	#N/A	#N/A	#N/A	#N/A	#N/A	#N/A	#N/A	#N/A	#N/A	#N/A	#N/A	#N/A	#N/A	#N/A		103.5	#N/A	#N/A	#N/A	#N/A	#N/A	#N/A	#N/A	#N/A	#N/A	#N/A	#N/A	#N/A	#N/A	#N/A	#N/A	#N/A		0	#N/A	#N/A	#N/A	#N/A	#N/A	#N/A	#N/A	#N/A	#N/A	#N/A	#N/A	#N/A
	#N/A	#N/A	#N/A	#N/A	#N/A	#N/A	#N/A	#N/A	#N/A	11.1567	#N/A	#N/A	#N/A	#N/A	#N/A	#N/A	#N/A		#N/A	#N/A	#N/A	#N/A	#N/A	#N/A	#N/A	#N/A	#N/A	85	#N/A	#N/A	#N/A	#N/A	#N/A	#N/A	#N/A		#N/A	#N/A	#N/A	#N/A	#N/A	#N/A	#N/A	#N/A	#N/A	0	#N/A	#N/A	#N/A
	1.71702	#N/A	#N/A	#N/A	#N/A	#N/A	#N/A	#N/A	#N/A	#N/A	#N/A	#N/A	#N/A	#N/A	#N/A	#N/A	#N/A		50.6	#N/A	#N/A	#N/A	#N/A	#N/A	#N/A	#N/A	#N/A	#N/A	#N/A	#N/A	#N/A	#N/A	#N/A	#N/A	#N/A		64	#N/A	#N/A	#N/A	#N/A	#N/A	#N/A	#N/A	#N/A	#N/A	#N/A	#N/A	#N/A
	#N/A	#N/A	#N/A	#N/A	#N/A	#N/A	#N/A	#N/A	#N/A	12.6092	#N/A	#N/A	#N/A	#N/A	#N/A	#N/A	#N/A		#N/A	#N/A	#N/A	#N/A	#N/A	#N/A	#N/A	#N/A	#N/A	76.1	#N/A	#N/A	#N/A	#N/A	#N/A	#N/A	#N/A		#N/A	#N/A	#N/A	#N/A	#N/A	#N/A	#N/A	#N/A	#N/A	0	#N/A	#N/A	#N/A
	11.8054	#N/A	#N/A	#N/A	#N/A	#N/A	#N/A	#N/A	#N/A	#N/A	#N/A	#N/A	#N/A	#N/A	#N/A	#N/A	#N/A		104.6	#N/A	#N/A	#N/A	#N/A	#N/A	#N/A	#N/A	#N/A	#N/A	#N/A	#N/A	#N/A	#N/A	#N/A	#N/A	#N/A		0	#N/A	#N/A	#N/A	#N/A	#N/A	#N/A	#N/A	#N/A	#N/A	#N/A	#N/A	#N/A
	#N/A	#N/A	#N/A	#N/A	#N/A	#N/A	#N/A	#N/A	#N/A	4.68693	#N/A	#N/A	#N/A	#N/A	#N/A	#N/A	#N/A		#N/A	#N/A	#N/A	#N/A	#N/A	#N/A	#N/A	#N/A	#N/A	54.2	#N/A	#N/A	#N/A	#N/A	#N/A	#N/A	#N/A		#N/A	#N/A	#N/A	#N/A	#N/A	#N/A	#N/A	#N/A	#N/A	0	#N/A	#N/A	#N/A
	1.70057	#N/A	#N/A	#N/A	#N/A	#N/A	#N/A	#N/A	#N/A	#N/A	#N/A	#N/A	#N/A	#N/A	#N/A	#N/A	#N/A		49.2	#N/A	#N/A	#N/A	#N/A	#N/A	#N/A	#N/A	#N/A	#N/A	#N/A	#N/A	#N/A	#N/A	#N/A	#N/A	#N/A		54	#N/A	#N/A	#N/A	#N/A	#N/A	#N/A	#N/A	#N/A	#N/A	#N/A	#N/A	#N/A
	#N/A	#N/A	#N/A	#N/A	#N/A	#N/A	#N/A	#N/A	#N/A	4.81335	#N/A	#N/A	#N/A	#N/A	#N/A	#N/A	#N/A		#N/A	#N/A	#N/A	#N/A	#N/A	#N/A	#N/A	#N/A	#N/A	50.1	#N/A	#N/A	#N/A	#N/A	#N/A	#N/A	#N/A		#N/A	#N/A	#N/A	#N/A	#N/A	#N/A	#N/A	#N/A	#N/A	#N/A	#N/A	#N/A	#N/A
	1.66597	#N/A	#N/A	#N/A	#N/A	#N/A	#N/A	#N/A	#N/A	#N/A	#N/A	#N/A	#N/A	#N/A	#N/A	#N/A	#N/A		70.3	#N/A	#N/A	#N/A	#N/A	#N/A	#N/A	#N/A	#N/A	#N/A	#N/A	#N/A	#N/A	#N/A	#N/A	#N/A	#N/A		#N/A	#N/A	#N/A	#N/A	#N/A	#N/A	#N/A	#N/A	#N/A	#N/A	#N/A	#N/A	#N/A
	7.39235	#N/A	#N/A	#N/A	#N/A	#N/A	#N/A	#N/A	#N/A	#N/A	#N/A	#N/A	#N/A	#N/A	#N/A	#N/A	#N/A		82.5	#N/A	#N/A	#N/A	#N/A	#N/A	#N/A	#N/A	#N/A	#N/A	#N/A	#N/A	#N/A	#N/A	#N/A	#N/A	#N/A		#N/A	#N/A	#N/A	#N/A	#N/A	#N/A	#N/A	#N/A	#N/A	#N/A	#N/A	#N/A	#N/A
	#N/A	#N/A	#N/A	#N/A	#N/A	#N/A	#N/A	#N/A	0.809859	#N/A	#N/A	#N/A	#N/A	#N/A	#N/A	#N/A	#N/A		#N/A	#N/A	#N/A	#N/A	#N/A	#N/A	#N/A	#N/A	30.1	#N/A	#N/A	#N/A	#N/A	#N/A	#N/A	#N/A	#N/A		#N/A	#N/A	#N/A	#N/A	#N/A	#N/A	#N/A	#N/A	#N/A	#N/A	#N/A	#N/A	#N/A
	#N/A	0.0577105	#N/A	#N/A	#N/A	#N/A	#N/A	#N/A	#N/A	#N/A	#N/A	#N/A	#N/A	#N/A	#N/A	#N/A	#N/A		#N/A	5.6	#N/A	#N/A	#N/A	#N/A	#N/A	#N/A	#N/A	#N/A	#N/A	#N/A	#N/A	#N/A	#N/A	#N/A	#N/A		#N/A	#N/A	#N/A	#N/A	#N/A	#N/A	#N/A	#N/A	#N/A	#N/A	#N/A	#N/A	#N/A
[truncated: 76 more columns]
